# Supplementary material for: Global-scale computational analysis of genomic sequences reveals the recombination pattern and coevolution dynamics of cereal-infecting geminiviruses
Source: PubMed Central journal article supplement (PMC4311259; doi:10.1038/srep08153), 2015-01-30
Supplement: srep08153-s1.pdf [file srep08153-s1.pdf]

## Supporting Information for

Global-scale computational analysis of genomic sequences reveals the recombination pattern and coevolution dynamics of cereal-infecting geminiviruses

Beilei Wu<sup>1</sup>, Xiaonan Shang<sup>1</sup>, Jörg Schubert<sup>2</sup>, Antje Habekuß<sup>3</sup>, Santiago F. Elena<sup>4</sup>,  
Xifeng Wang<sup>1\*</sup>

<sup>1</sup>*State Key Laboratory for Biology of Plant Diseases and Insect Pests, Institute of Plant Protection, Chinese Academy of Agricultural Sciences, Beijing 100193, China*

<sup>2</sup>*Institute for Biosafety in Plant Biotechnology, Federal Research Institute for Cultivated Plants, Julius Kuehn Institute, Erwin-Baur-Straße 27, 06484, Quedlinburg, Germany*

<sup>3</sup>*Institute for Resistance Research and Stress Tolerance, Federal Research Institute for Cultivated Plants, Julius Kuehn Institute, Erwin-Baur-Straße 27, 06484, Quedlinburg, Germany*

<sup>4</sup>*Instituto de Biología Molecular y Celular de Plantas (CSIC-UPV), Campus UPV CPI 8E, Ingeniero Fausto Elio s/n, 46022 Valencia, Spain*

\*Corresponding author: Email: [xfwang@ippcaas.cn](mailto:xfwang@ippcaas.cn)

**Supplementary Figure S1. Phylogenetic maximum credibility clade (MCC) tree for the 230 isolates of cereal-infecting geminiviruses.**

Posterior probability values indicate support for each node, and time scale is shown at the bottom of tree. The isolates painted by the yellow color were the representatives of the strains suggested by Muhire *et al.* (2013). The different strains of WDV were clustered by the vertical virgule of purple color. The branches of WDV-specific group, WDV-specific group and ODV were colored by orange, blue and deep red respectively.

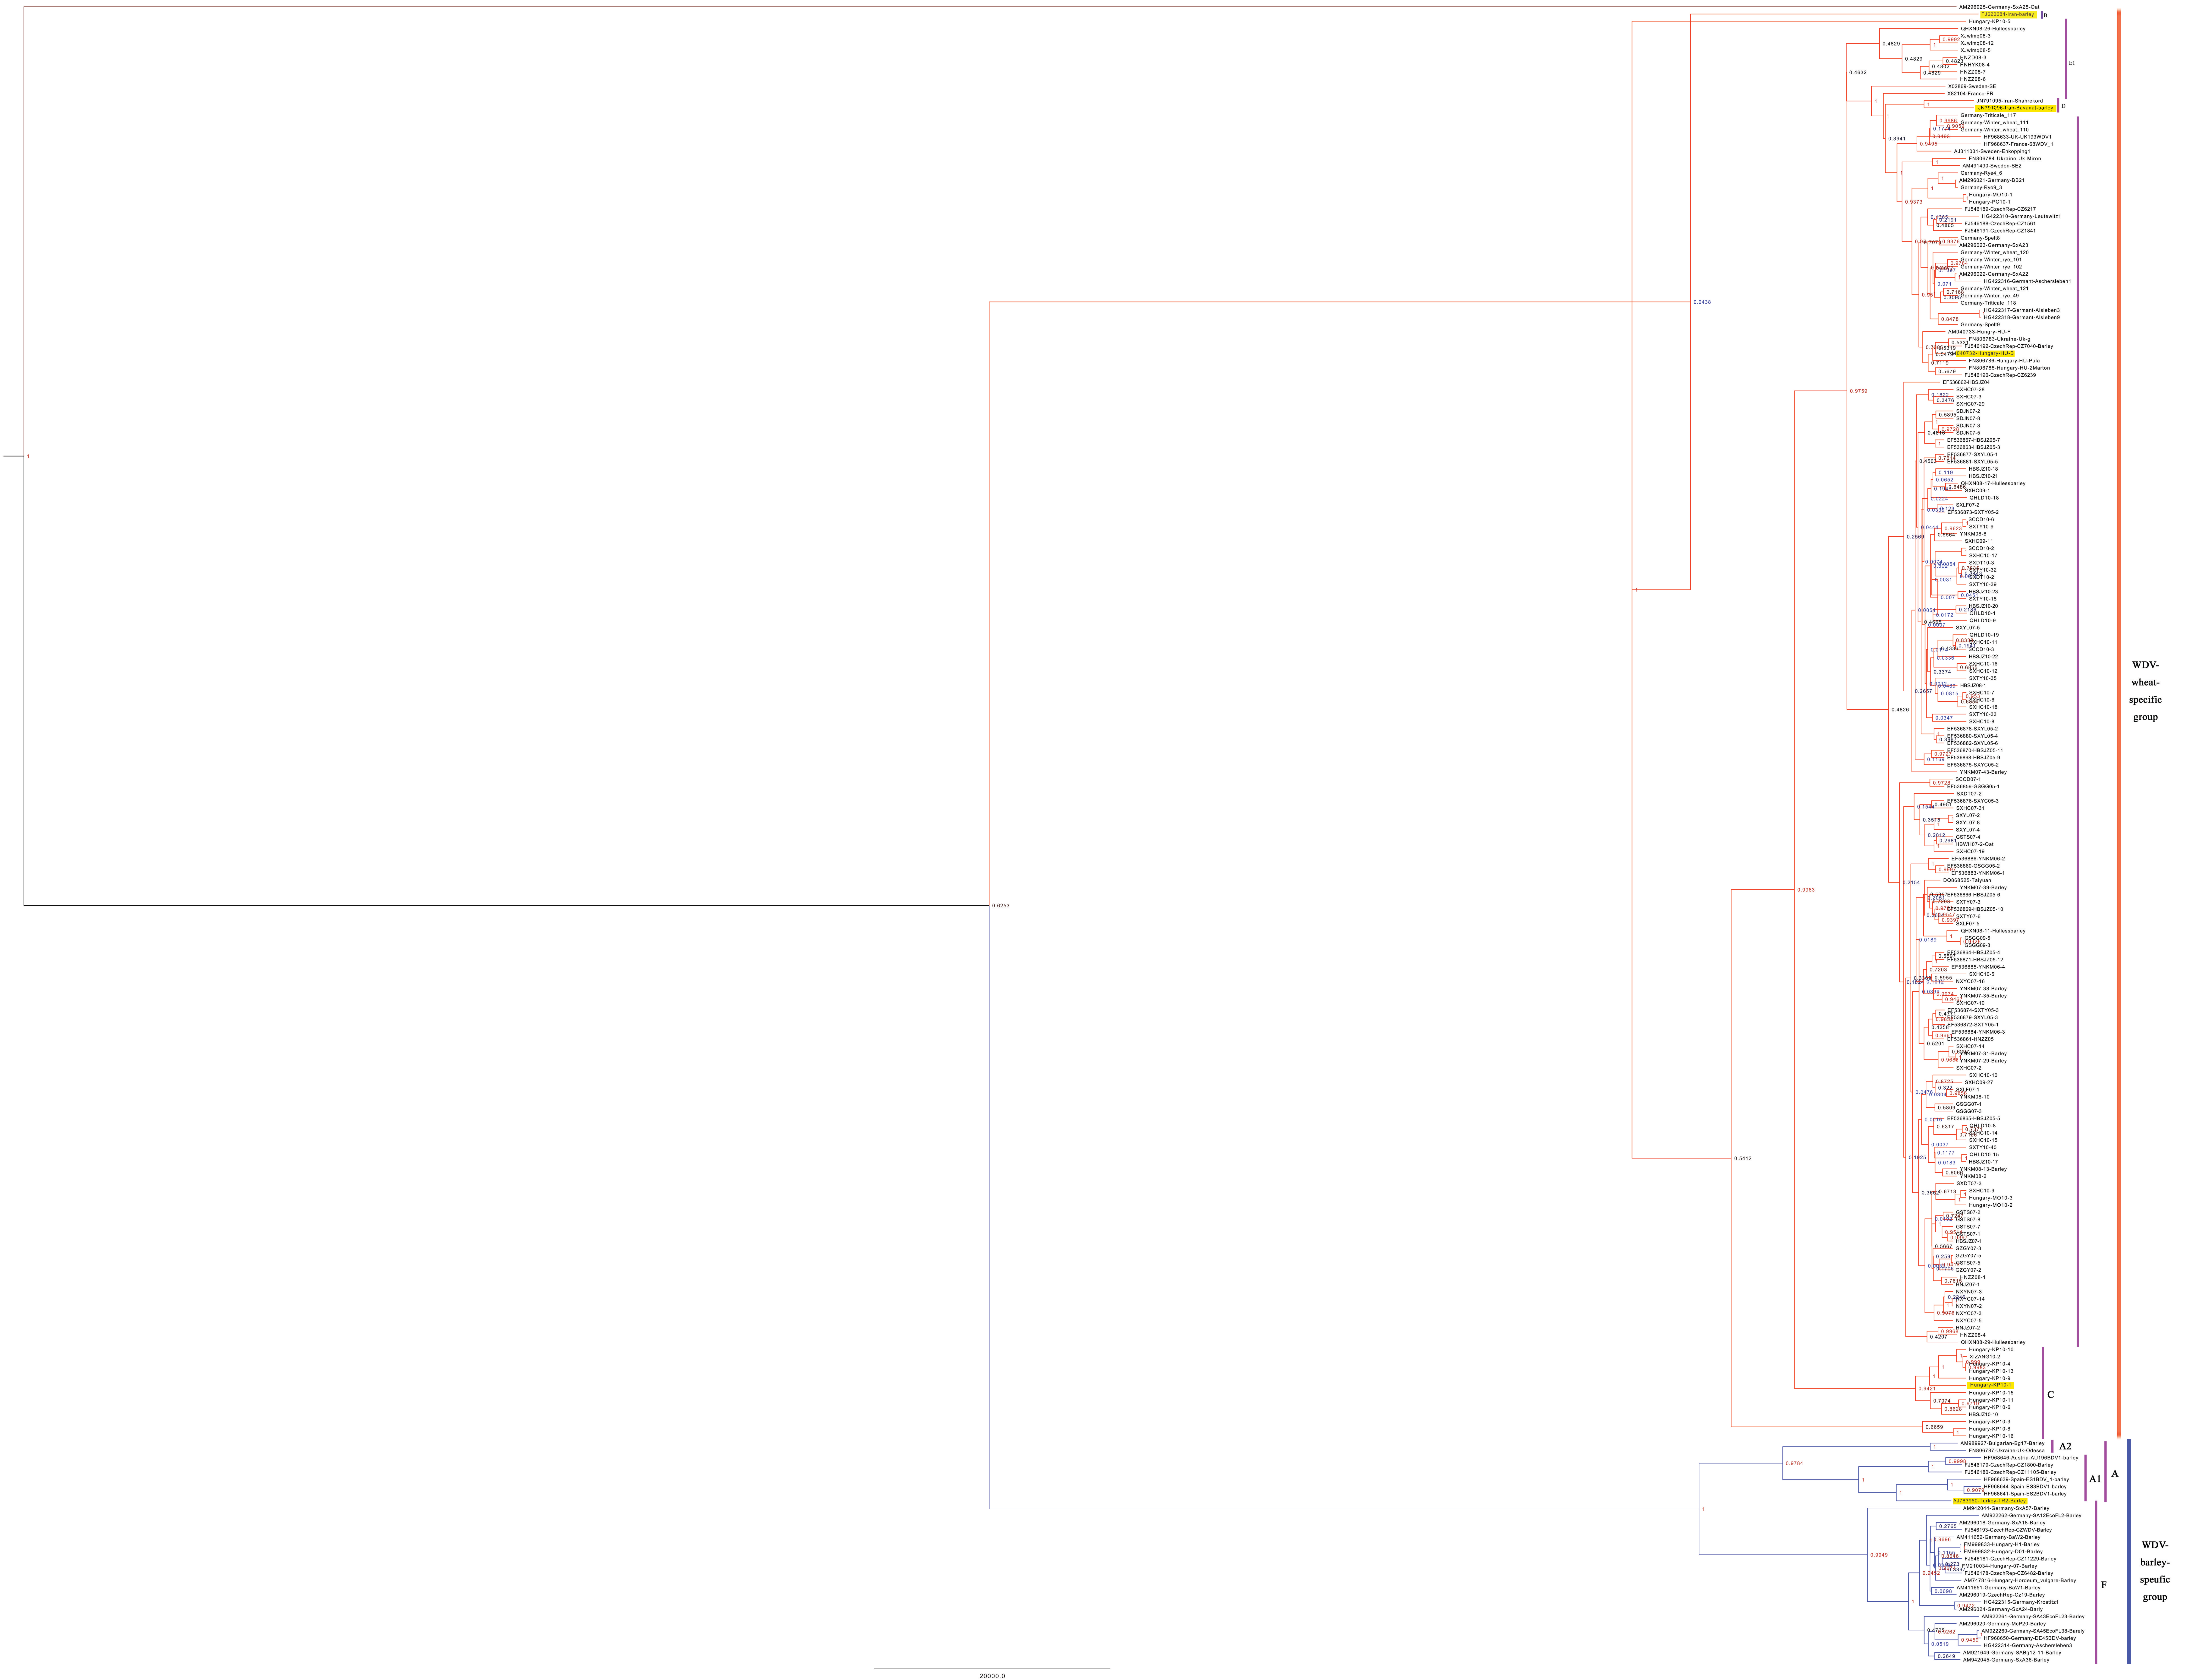

WDV-wheat-specific group

WDV-barley-specific group

**Supplementary Figure S2. Phylogenetic maximum credibility clade (MCC) tree of *mp*, *cp*, *rep*, LIR and SIR+intron for 209 isolates of cereal-infecting geminiviruses.**

Posterior probability values indicate support for each node, and time scale is shown at the bottom of tree. The branches of WDV-wheat-specific group, WDV-barley-specific group and ODV were colored by orange, blue and deep red respectively. A: *mp* gene; B: *cp* gene; C: *rep* gene; D: LIR region; E: SIR+intron region.

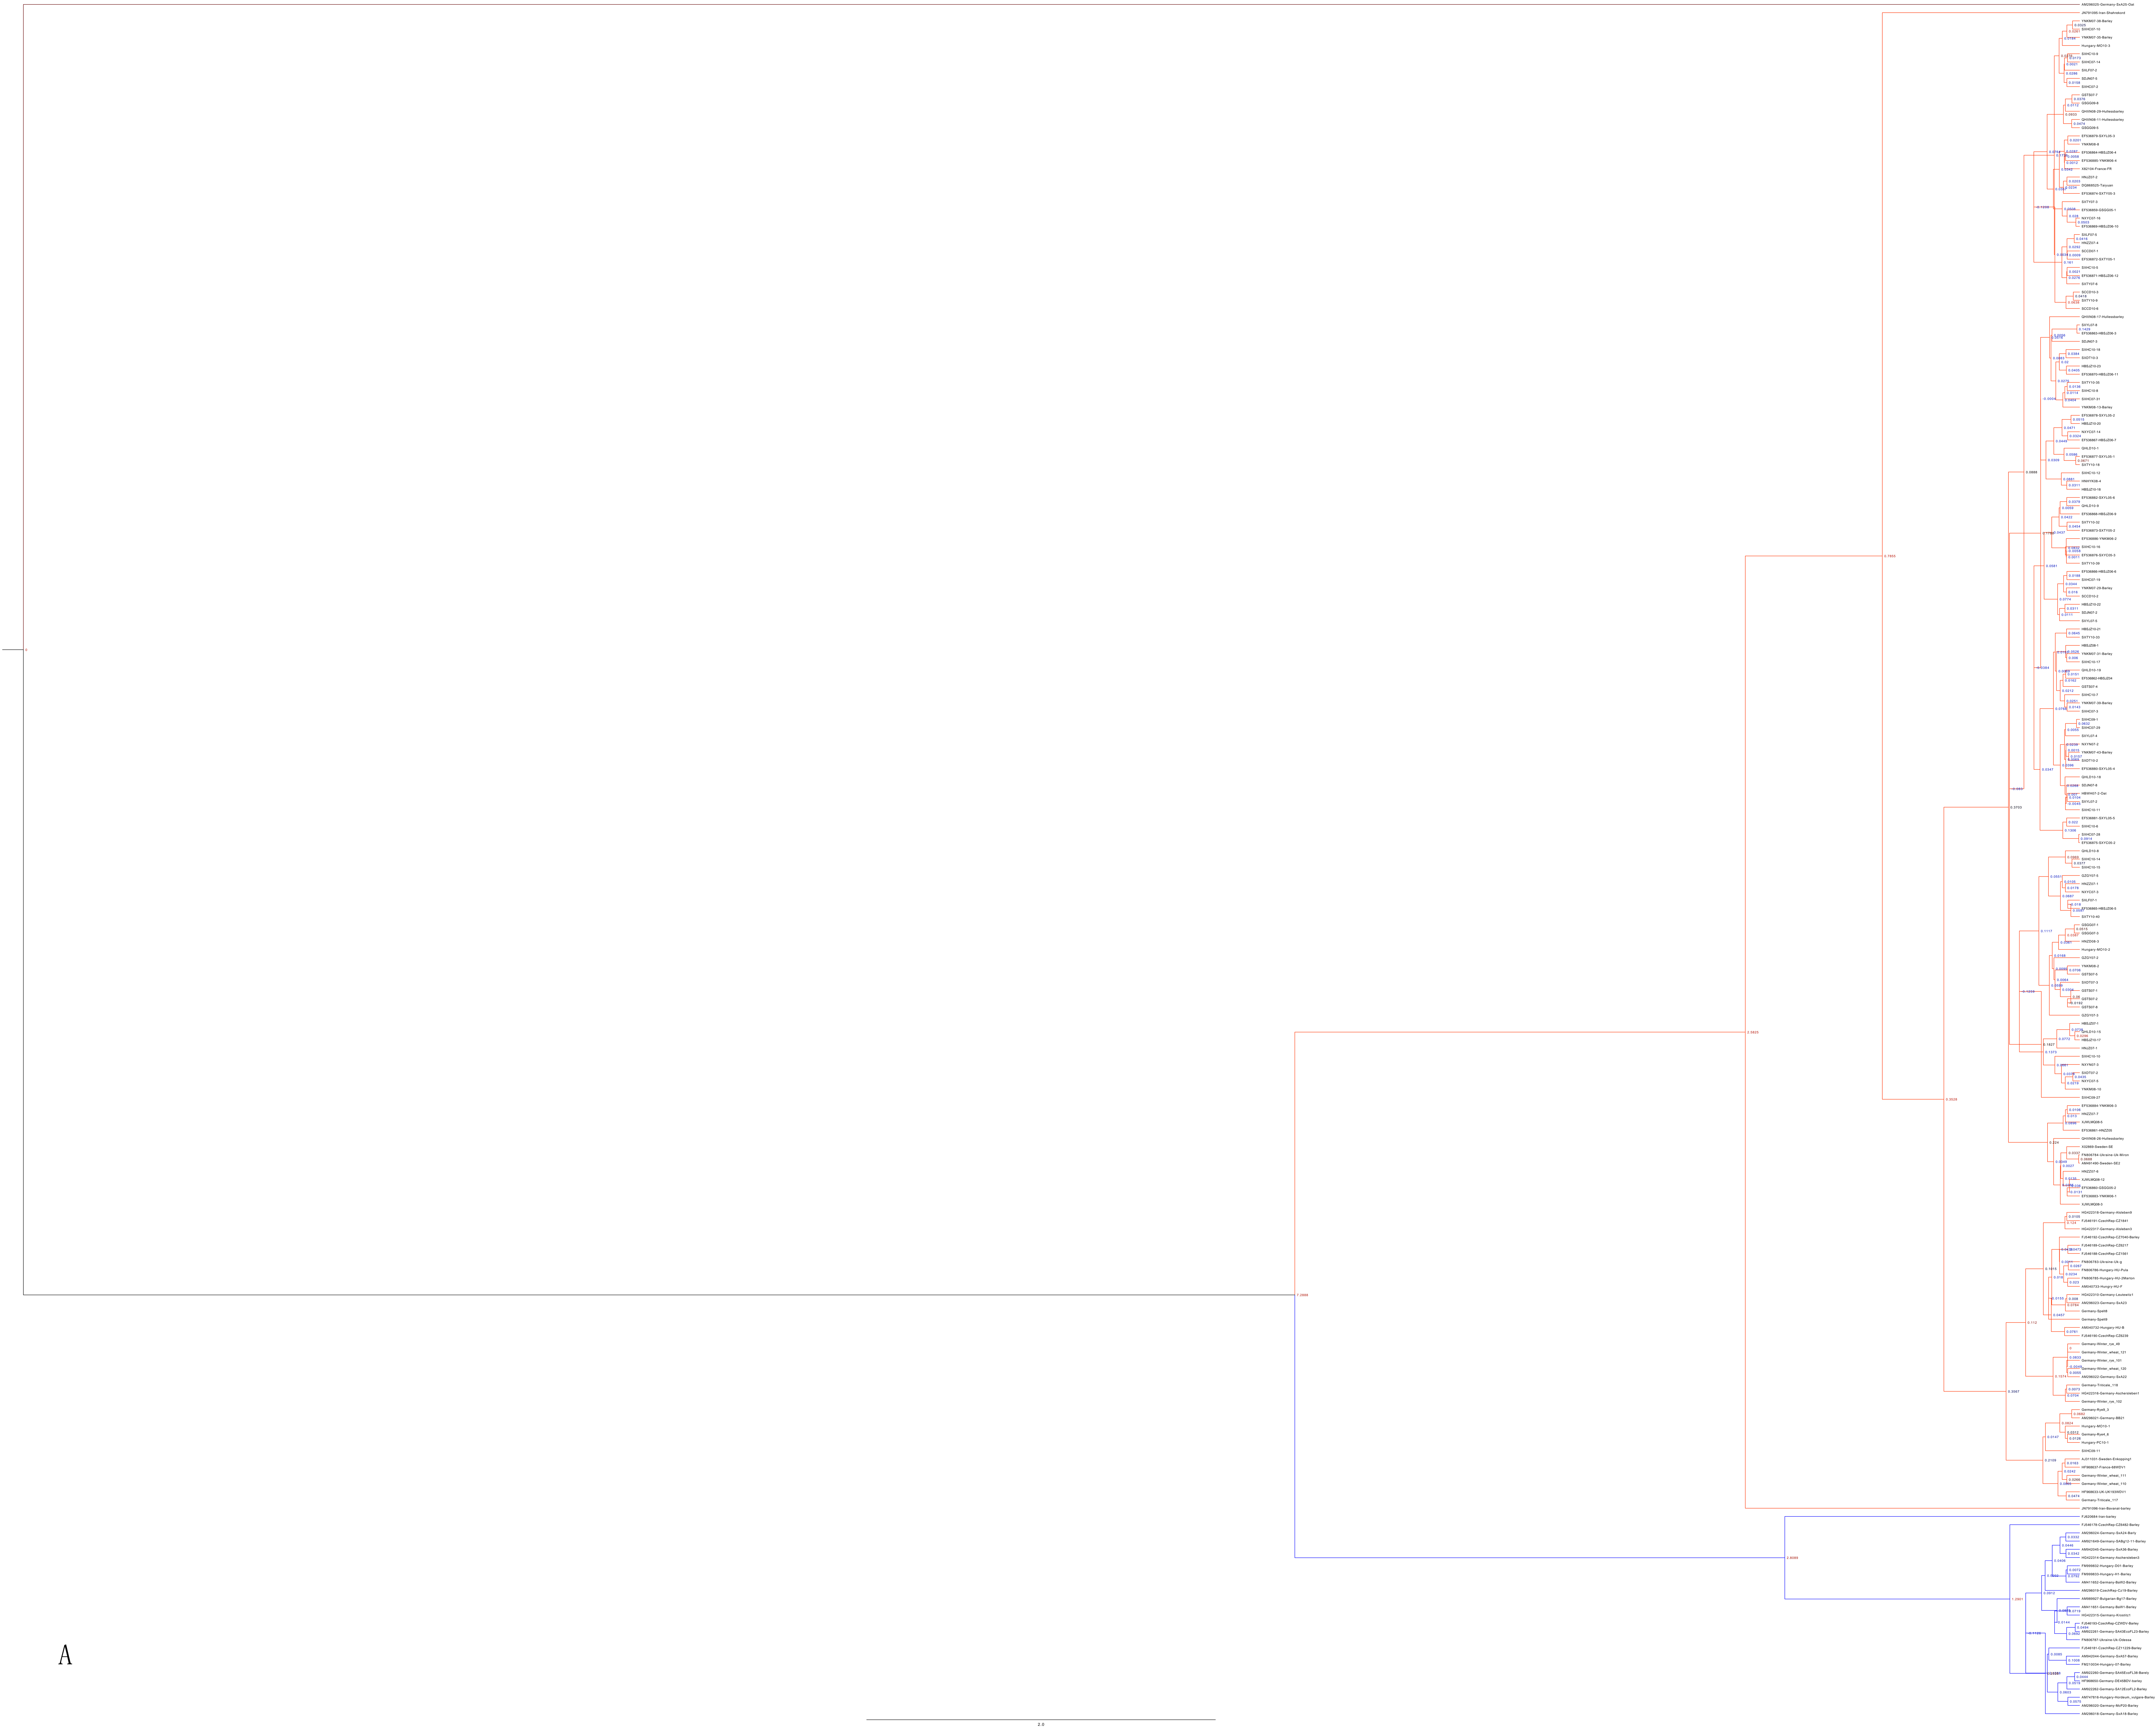

A



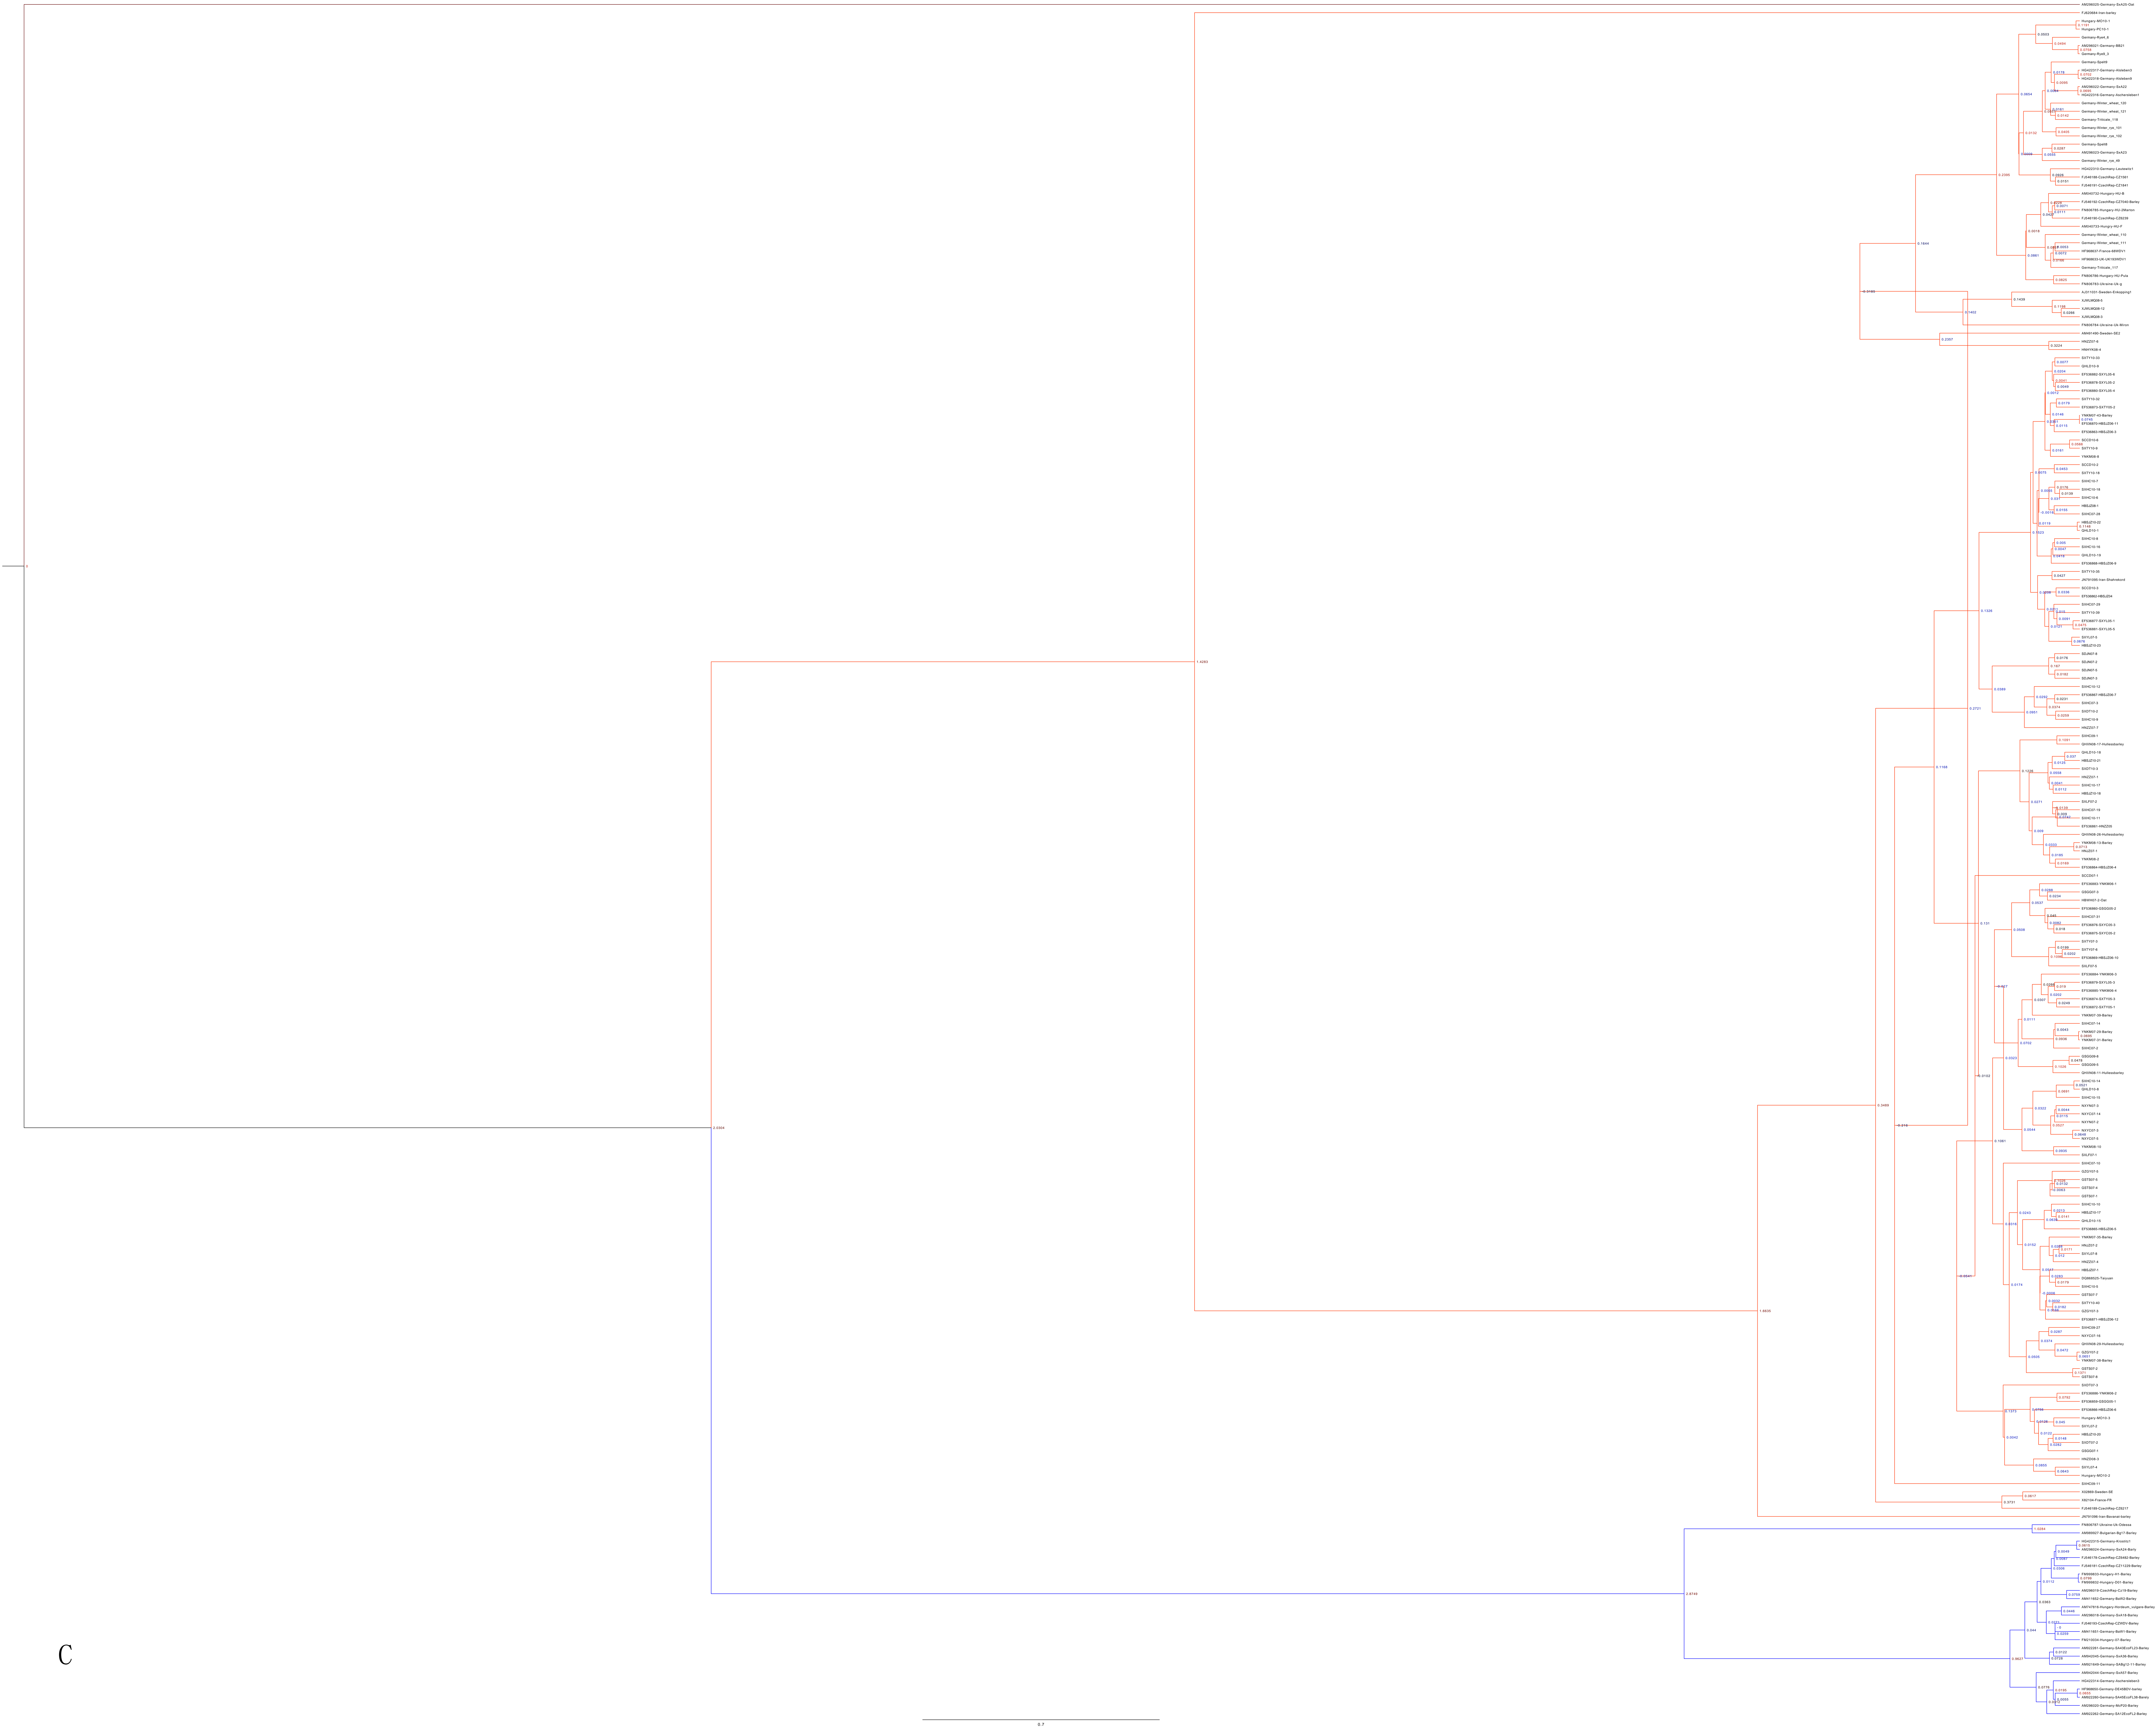

C





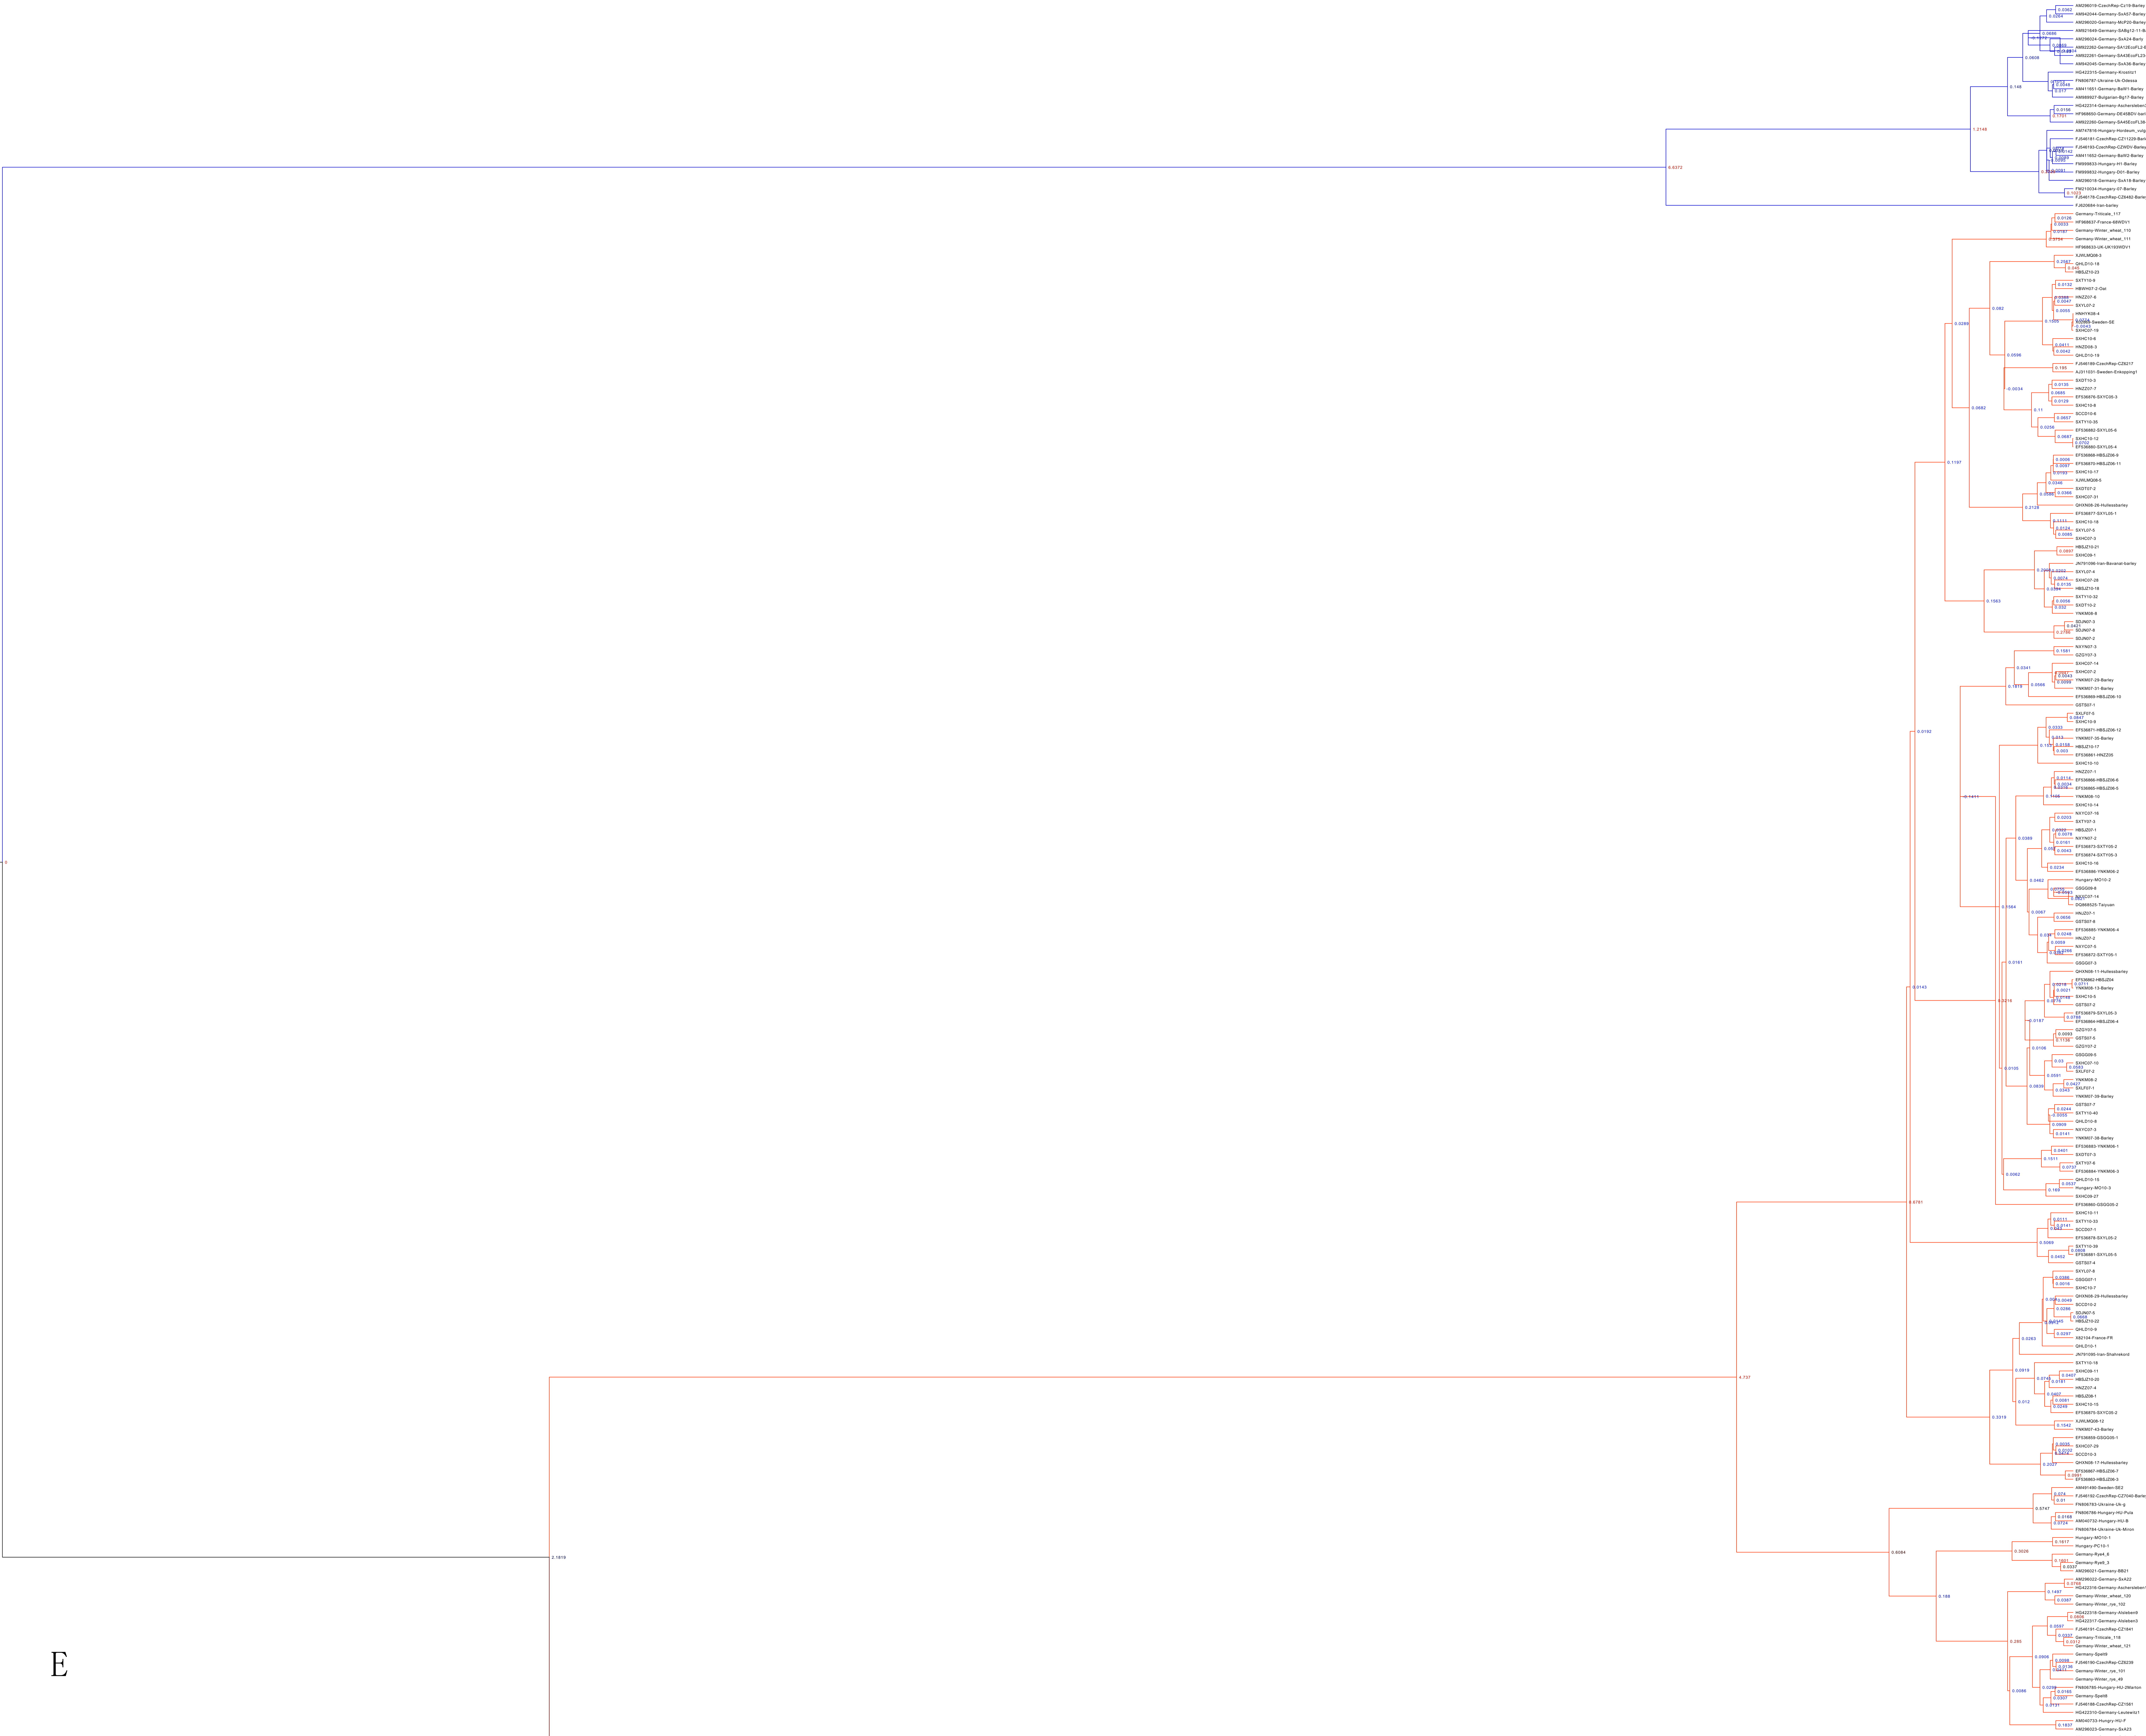

E

**Supplementary Table. S1 The percent nucleotide similarities among each of the six strains in *Wheat dwarf virus***

| <b>Strains</b> | <b>Lowest identity (%)</b> | <b>Highest identity (%)</b> |
|----------------|----------------------------|-----------------------------|
| A(N:9)         | 94.37                      | 99.53                       |
| B(N:1)         | NA                         | NA                          |
| C(N:14)        | 97.68                      | 100                         |
| D(N:2)         | 94.11                      | 94.11                       |
| E(N:181)       | 96.43                      | 100                         |
| F(N:22)        | 97.86                      | 100                         |

N: The number of the isolates in the group

NA: not available.

**Supplementary Table S2. Genomic sequences of *Wheat dwarf virus* obtained in our laboratory and this study.**

| Years | Isolates/hosts            | Collection date | Country | Accession No. |
|-------|---------------------------|-----------------|---------|---------------|
| 2004  | DQ868525/SXTY04/wheat     | 4-May           | China   | DQ868525      |
| 2005  | EF536859/GSGG05-1/wheat   | 5-Apr           | China   | EF536859      |
| 2005  | EF536860/GSGG05-2/wheat   | 5-Apr           | China   | EF536860      |
| 2005  | EF536861/HNZZ05/wheat     | 5-Apr           | China   | EF536861      |
| 2004  | EF536862/HBSJZ04/wheat    | 4-Apr           | China   | EF536862      |
| 2005  | EF536863/HBSJZ05-3 /wheat | 5-Apr           | China   | EF536863      |
| 2005  | EF536864/HBSJZ05-4/wheat  | 5-Apr           | China   | EF536864      |
| 2005  | EF536865/HBSJZ05-5/wheat  | 5-Apr           | China   | EF536865      |
| 2005  | EF536866/HBSJZ05-6/wheat  | 5-Apr           | China   | EF536866      |
| 2005  | EF536867/HBSJZ05-7/wheat  | 5-Apr           | China   | EF536867      |
| 2005  | EF536868/HBSJZ05-9/wheat  | 5-Apr           | China   | EF536868      |
| 2005  | EF536869/HBSJZ05-10/wheat | 5-Apr           | China   | EF536869      |
| 2005  | EF536870/HBSJZ05-11/wheat | 5-Apr           | China   | EF536871      |
| 2005  | EF536871/HBSJZ05-12/wheat | 5-Apr           | China   | EF536871      |
| 2005  | EF536872/SXTY05-1/wheat   | 5-May           | China   | EF536872      |
| 2005  | EF536873/SXTY05-2/wheat   | 5-May           | China   | EF536873      |
| 2005  | EF536874/SXTY05-3/wheat   | 5-May           | China   | EF536874      |
| 2005  | EF536875/SXYC05-2/wheat   | 5-Apr           | China   | EF536875      |
| 2005  | EF536876/SXYC05-3/wheat   | 5-Apr           | China   | EF536876      |
| 2005  | EF536877/SXYL05-1/wheat   | 5-Apr           | China   | EF536877      |
| 2005  | EF536878/SXYL05-2/wheat   | 5-Apr           | China   | EF536878      |
| 2005  | EF536879/SXYL05-3/wheat   | 5-Apr           | China   | EF536879      |
| 2005  | EF536880/SXYL05-4/wheat   | 5-Apr           | China   | EF536880      |
| 2005  | EF536881/SXYL05-5/wheat   | 5-Apr           | China   | EF536881      |
| 2005  | EF536882/SXYL05-6/wheat   | 5-Apr           | China   | EF536882      |
| 2006  | EF536883/YNKM06-1/wheat   | 6-Apr           | China   | EF536883      |
| 2006  | EF536884/YNKM06-3/wheat   | 6-Apr           | China   | EF536884      |
| 2006  | EF536885/YNKM06-4/wheat   | 6-Apr           | China   | EF536885      |
| 2006  | EF536886/YNKM06-2/wheat   | 6-Apr           | China   | EF536886      |
| 2007  | EU541489/07YNKM29 /barley | 2007/3/15       | China   | EU541489      |
| 2007  | KJ536143/07YNKM35 /barley | 2007/3/15       | China   | KJ536143      |
| 2007  | KJ536144/07YNKM38-/barley | 2007/3/15       | China   | KJ536144      |
| 2007  | KJ536145/07YNKM39-/barley | 2007/3/15       | China   | KJ536145      |
| 2007  | KJ536146/07YNKM43-/barley | 2007/3/15       | China   | KJ536146      |
| 2007  | KJ536142/07YNKM31-/barley | 2007/3/15       | China   | KJ536142      |
| 2007  | KJ536086/07GZGY2-/wheat   | 2007/3/17       | China   | KJ536086      |
| 2007  | KJ536087/07GZGY3/wheat    | 2007/3/17       | China   | KJ536087      |
| 2007  | KJ536088/07GZGY5/wheat    | 2007/3/17       | China   | KJ536088      |
| 2007  | KJ536125/07SCCD1/wheat    | 2007/3/12       | China   | KJ536125      |
| 2007  | KJ536090/07HNJZ1/wheat    | 2007/4/1        | China   | KJ536090      |

|      |                          |           |       |          |
|------|--------------------------|-----------|-------|----------|
| 2007 | KJ536091/07HNJZ2/wheat   | 2007/4/1  | China | KJ536091 |
| 2007 | KJ536126/07HBWH2/oat     | 2007/3/15 | China | KJ536126 |
| 2007 | KJ536078/07GSGG1/wheat   | 2007/4/15 | China | KJ536078 |
| 2007 | KJ536079/07GSGG3/wheat   | 2007/4/15 | China | KJ536079 |
| 2007 | KJ536080/07GSTS1/wheat   | 2007/4/16 | China | KJ536080 |
| 2007 | KJ536081/07GSTS2/wheat   | 2007/4/16 | China | KJ536081 |
| 2007 | KJ536082/07GSTS4/wheat   | 2007/4/16 | China | KJ536082 |
| 2007 | KJ536083/07GSTS5/wheat   | 2007/4/16 | China | KJ536083 |
| 2007 | KJ536084/07GSTS7/wheat   | 2007/4/16 | China | KJ536084 |
| 2007 | KJ536085/07GSTS8/wheat   | 2007/4/16 | China | KJ536085 |
| 2007 | KJ536111/07SXHC2/wheat   | 2007/5/15 | China | KJ536111 |
| 2007 | KJ536114/07SXHC3/wheat   | 2007/5/15 | China | KJ536114 |
| 2007 | KJ536108/07SXHC10/wheat  | 2007/5/15 | China | KJ536108 |
| 2007 | KJ536109/07SXHC14/wheat  | 2007/5/15 | China | KJ536109 |
| 2007 | KJ536110/07SXHC19/wheat  | 2007/5/15 | China | KJ536110 |
| 2007 | KJ536112/07SXHC28/wheat  | 2007/5/15 | China | KJ536112 |
| 2007 | KJ536113/07SXHC29/wheat  | 2007/5/15 | China | KJ536113 |
| 2007 | KJ536115/07SXHC31/wheat  | 2007/5/15 | China | KJ536115 |
| 2007 | KJ536121/07SXYL2/wheat   | 2007/4/17 | China | KJ536121 |
| 2007 | KJ536122/07SXYL4/wheat   | 2007/4/17 | China | KJ536122 |
| 2007 | KJ536123/07SXYL5/wheat   | 2007/4/17 | China | KJ536123 |
| 2007 | KJ536124/07SXYL8/wheat   | 2007/4/17 | China | KJ536124 |
| 2007 | KJ536089/07HBSJZ1/wheat  | 2007/4/18 | China | KJ536089 |
| 2007 | KJ536116/07SXLF1/wheat   | 2007/4/27 | China | KJ536116 |
| 2007 | KJ536117/07SXLF2/wheat   | 2007/4/27 | China | KJ536117 |
| 2007 | KJ536118/07SXLF5/wheat   | 2007/4/27 | China | KJ536118 |
| 2007 | KJ536102/07SDJN2/wheat   | 2007/5/10 | China | KJ536102 |
| 2007 | KJ536103/07SDJN3/wheat   | 2007/5/10 | China | KJ536103 |
| 2007 | KJ536105/07SDJN5/wheat   | 2007/5/10 | China | KJ536105 |
| 2007 | KJ536104/07SDJN8/wheat   | 2007/5/10 | China | KJ536104 |
| 2007 | KJ536119/07SXTY3/wheat   | 2007/5/8  | China | KJ536119 |
| 2007 | KJ536120/07SXTY6/wheat   | 2007/5/8  | China | KJ536120 |
| 2007 | KJ536100/07NXYN2/wheat   | 2007/4/20 | China | KJ536100 |
| 2007 | KJ536101/07NXYN3/wheat   | 2007/4/20 | China | KJ536101 |
| 2007 | KJ536098/07NXYC3/wheat   | 2007/4/20 | China | KJ536098 |
| 2007 | KJ536099/07NXYC5/wheat   | 2007/4/20 | China | KJ536099 |
| 2007 | KJ536096/07NXYC14/wheat  | 2007/4/20 | China | KJ536096 |
| 2007 | KJ536097/07NXYC16/wheat  | 2007/4/20 | China | KJ536097 |
| 2007 | KJ536106/07SXDT2/wheat   | 2007/6/15 | China | KJ536106 |
| 2007 | KJ536107/07SXDT3/wheat   | 2007/6/15 | China | KJ536107 |
| 2008 | KJ536131/08YNKM8/wheat   | 2008/3/15 | China | KJ536131 |
| 2008 | KJ536130/08YNKM2/wheat   | 2008/3/15 | China | KJ536130 |
| 2008 | KJ536129/08YNKM10/wheat  | 2008/3/15 | China | KJ536129 |
| 2008 | KJ536141/08YNKM13/barley | 2008/3/15 | China | KJ536141 |

|      |                                     |           |       |          |
|------|-------------------------------------|-----------|-------|----------|
| 2008 | KJ536127/08HNZD-3/wheat             | 2008/4/1  | China | KJ536127 |
| 2008 | KJ536128/08HNHYK-4/wheat            | 2008/4/2  | China | KJ536128 |
| 2008 | KJ536092/08HNZZ1/wheat              | 2008/3/30 | China | KJ536092 |
| 2008 | KJ536093/08HNZZ4/wheat              | 2008/3/30 | China | KJ536093 |
| 2008 | KJ536094/08HNZZ6/wheat              | 2008/3/30 | China | KJ536094 |
| 2008 | KJ536095/08HNZZ7/wheat              | 2008/3/30 | China | KJ536095 |
| 2008 | KJ536133/08XJWLMQ-3/wheat           | 2008/5/15 | China | KJ536133 |
| 2008 | KJ536134/08XJWLMQ-5/wheat           | 2008/5/15 | China | KJ536134 |
| 2008 | KJ536135/08XJWLMQ-12/wheat          | 2008/5/15 | China | KJ536135 |
| 2008 | KJ536150/08QHYN-11/ highland barley | 2008/6/15 | China | KJ536150 |
| 2008 | KJ536149/08QHYN-17/ highland barley | 2008/6/15 | China | KJ536149 |
| 2008 | KJ536148/08QHYN-26/ highland barley | 2008/6/15 | China | KJ536148 |
| 2008 | KJ536147/08QHYN-29/ highland barley | 2008/6/15 | China | KJ536147 |
| 2008 | KJ536132/08HBSJZ-1/wheat            | 2008/4/17 | China | KJ536132 |
| 2009 | KJ536138/09SXHC-1/wheat             | 2008/5/13 | China | KJ536138 |
| 2009 | KJ536139/09SXHC-11/wheat            | 2008/5/13 | China | KJ536139 |
| 2009 | KJ536140/09SXHC-27/wheat            | 2008/5/13 | China | KJ536140 |
| 2009 | KJ536137/09GSGG-5/wheat             | 2008/4/15 | China | KJ536137 |
| 2009 | KJ536136/09GSGG-8/wheat             | 2008/4/15 | China | KJ536136 |
| 2010 | JQ647501/SXTY10-9/wheat             | 2010/5/8  | China | JQ647501 |
| 2010 | JQ647502/SXTY10-18/wheat            | 2010/5/8  | China | JQ647502 |
| 2010 | JQ647503/SXTY10-32/wheat            | 2010/5/8  | China | JQ647503 |
| 2010 | JQ647504/SXTY10-33/wheat            | 2010/5/8  | China | JQ647504 |
| 2010 | JQ647505/SXTY10-35/ wheat           | 2010/5/8  | China | JQ647505 |
| 2010 | JQ647506/SXTY10-39/ wheat           | 2010/5/8  | China | JQ647506 |
| 2010 | JQ647507/SXTY10-40/ wheat           | 2010/5/8  | China | JQ647507 |
| 2010 | JQ647486/SXDT10-2/ wheat            | 2010/5/8  | China | JQ647486 |
| 2010 | JQ647487/SXDT10-3/ wheat            | 2010/5/8  | China | JQ647487 |
| 2010 | JQ647470/HBSJZ10-10/ wheat          | 2010/4/17 | China | JQ647470 |
| 2010 | JQ647471/HBSJZ10-17/ wheat          | 2010/4/17 | China | JQ647471 |
| 2010 | JQ647472/HBSJZ10-18/ wheat          | 2010/4/17 | China | JQ647472 |
| 2010 | JQ647473/HBSJZ10-20/ wheat          | 2010/4/17 | China | JQ647473 |
| 2010 | JQ647474/HBSJZ10-21/ wheat          | 2010/4/17 | China | JQ647474 |
| 2010 | JQ647475/HBSJZ10-22/ wheat          | 2010/4/17 | China | JQ647475 |
| 2010 | JQ647476/HBSJZ10-23/ wheat          | 2010/4/17 | China | JQ647476 |
| 2010 | JQ647488/SXHC10-5/ wheat            | 2010/5/12 | China | JQ647488 |
| 2010 | JQ647489/SXHC10-6/ wheat            | 2010/5/12 | China | JQ647489 |
| 2010 | JQ647490/SXHC10-7/ wheat            | 2010/5/12 | China | JQ647490 |
| 2010 | JQ647491/SXHC10-8/ wheat            | 2010/5/12 | China | JQ647491 |
| 2010 | JQ647492/SXHC10-9/ wheat            | 2010/5/12 | China | JQ647492 |
| 2010 | JQ647493/SXHC10-10/ wheat           | 2010/5/12 | China | JQ647493 |
| 2010 | JQ647494/SXHC10-11/ wheat           | 2010/5/12 | China | JQ647494 |
| 2010 | JQ647495/SXHC10-12/ wheat           | 2010/5/12 | China | JQ647495 |
| 2010 | JQ647496/SXHC10-14/ wheat           | 2010/5/12 | China | JQ647496 |

|      |                                   |           |         |          |
|------|-----------------------------------|-----------|---------|----------|
| 2010 | JQ647497/SXHC10-15/ wheat         | 2010/5/12 | China   | JQ647497 |
| 2010 | JQ647498/SXHC10-16/ wheat         | 2010/5/12 | China   | JQ647498 |
| 2010 | JQ647499/SXHC10-17/ wheat         | 2010/5/12 | China   | JQ647499 |
| 2010 | JQ647500/SXHC10-18/ wheat         | 2010/5/12 | China   | JQ647500 |
| 2010 | JQ647483/SCCD10-2/ wheat          | 2010/3/12 | China   | JQ647483 |
| 2010 | JQ647484/SCCD10-3/ wheat          | 2010/3/12 | China   | JQ647484 |
| 2010 | JQ647485/SCCD10-6/ wheat          | 2010/3/12 | China   | JQ647485 |
| 2010 | JQ647477/QHLD10-1/ wheat          | 2010/6/15 | China   | JQ647477 |
| 2010 | JQ647478/QHLD10-8/ wheat          | 2010/6/15 | China   | JQ647478 |
| 2010 | JQ647479/QHLD10-9/ wheat          | 2010/6/15 | China   | JQ647479 |
| 2010 | JQ647480/QHLD10-15/ wheat         | 2010/6/15 | China   | JQ647480 |
| 2010 | JQ647481/QHLD10-18/ wheat         | 2010/6/15 | China   | JQ647481 |
| 2010 | JQ647482/QHLD10-19/ wheat         | 2010/6/15 | China   | JQ647482 |
| 2010 | JQ647508/XZ10-2// wheat           | 2010/6/25 | China   | JQ647508 |
| 2010 | JQ647467/Hungary-MO10-1/ wheat    | 2010/4/30 | China   | JQ647467 |
| 2010 | JQ647468/Hungary-MO10-2/ wheat    | 2010/4/30 | China   | JQ647468 |
| 2010 | JQ647469/Hungary-MO10-3/ wheat    | 2010/4/30 | China   | JQ647469 |
| 2010 | JQ647455/Hungary-kp10-1/ wheat    | 2010/4/30 | China   | JQ647455 |
| 2010 | JQ647456/Hungary-kp10-3/ wheat    | 2010/4/30 | China   | JQ647456 |
| 2010 | JQ647457/Hungary-kp10-4/ wheat    | 2010/4/30 | China   | JQ647457 |
| 2010 | JQ647458/Hungary-kp10-5/ wheat    | 2010/4/30 | China   | JQ647458 |
| 2010 | JQ647459/Hungary-kp10-6/ wheat    | 2010/4/30 | China   | JQ647459 |
| 2010 | JQ647460/Hungary-kp10-8/ wheat    | 2010/4/30 | China   | JQ647460 |
| 2010 | JQ647461/Hungary-kp10-9/ wheat    | 2010/4/30 | China   | JQ647461 |
| 2010 | JQ647462/Hungary-kp10-10/ wheat   | 2010/4/30 | China   | JQ647462 |
| 2010 | JQ647463/Hungary-kp10-11/ wheat   | 2010/4/30 | China   | JQ647463 |
| 2010 | JQ647464/Hungary-kp10-13/ wheat   | 2010/4/30 | China   | JQ647464 |
| 2010 | JQ647465/Hungary-kp10-15/ wheat   | 2010/4/30 | China   | JQ647465 |
| 2010 | JQ647466/Hungary-kp10-16/ wheat   | 2010/4/30 | China   | JQ647466 |
| 2010 | JQ647454/Hungary-pc10-1/ wheat    | 2010/4/30 | China   | JQ647454 |
| 2008 | KJ473695/Spelt8/Spelt             | 2008/5/15 | Germany | KJ473695 |
| 2008 | KJ473696/Spelt9/Spelt             | 2008/5/15 | Germany | KJ473696 |
| 2008 | KJ473697/Winter rye 49/Rye        | 2008/5/15 | Germany | KJ473697 |
| 2008 | KJ473698/Winter rye 101/Rye       | 2008/5/15 | Germany | KJ473698 |
| 2008 | KJ473699/Winter rye 102/Rye       | 2008/5/15 | Germany | KJ473699 |
| 2008 | KJ473700/Winter wheat 110/wheat   | 2008/5/15 | Germany | KJ473700 |
| 2008 | KJ473701/Winter wheat 111/wheat   | 2008/5/15 | Germany | KJ473701 |
| 2008 | KJ473702/Triticale 117/ Triticale | 2008/5/15 | Germany | KJ473702 |
| 2008 | KJ473703/Triticale 118/ Triticale | 2008/5/15 | Germany | KJ473703 |
| 2008 | KJ473704/Winter wheat 120/wheat   | 2008/5/15 | Germany | KJ473704 |
| 2008 | KJ473705/Winter wheat 121/wheat   | 2008/5/15 | Germany | KJ473705 |
| 2008 | KJ473706/Rye4 6/Rye               | 2008/5/15 | Germany | KJ473706 |
| 2008 | KJ473707/Rye9 3/Rye               | 2008/5/15 | Germany | KJ473707 |

**Supplementary Table S3. Genomic sequences of *Wheat dwarf virus* and *Oat dwarf virus* from GenBank used in this study.**

| Accession No. | Hosts  | Countries  | Isolates         | Collection date |
|---------------|--------|------------|------------------|-----------------|
| AM040733      | Wheat  | Hungary    | WDV-[HU-F]       | 2005/6/28       |
| AM040732      | Wheat  | Hungary    | WDV-[HU-B]       | 2005/6/28       |
| AJ311031      | Wheat  | Sweden     | WDV-[Enkopping]  | 2006/11/14      |
| X82104        | Wheat  | France     | WDV-[FR]         | 2005/4/18       |
| AM296018      | Barley | Germany    | BDV-[SxA18]      | 2008/1/25       |
| AM296019      | Barley | Czech Rep. | BDV-[Cz19]       | 2008/1/25       |
| AM296020      | Barley | Germany    | BDV-[McP20]      | 2008/1/25       |
| AM296021      | Wheat  | Germany    | WDV-[BB21]       | 2008/1/25       |
| AM296022      | Wheat  | Germany    | WDV-[SxA22]      | 2008/1/25       |
| AM296023      | Wheat  | Germany    | WDV-[SxA23]      | 2008/1/25       |
| AM296024      | Barley | Germany    | WDV-[SxA24]      | 2008/1/25       |
| AM296025      | Oat    | Germany    | ODV-[SxA25]      | 2008/1/25       |
| AM411651      | Barley | Germany    | BDV-[BaW1]       | 2007/6/18       |
| AM411652      | Barley | Germany    | BDV-[BaW2]       | 2007/6/18       |
| X02869        | Wheat  | Sweden     | WDV-[SE]         | 2005/7/1        |
| AJ783960      | Barley | Turkey     | BDV-[TR2]        | 2006/11/14      |
| AM491490      | Wheat  | Sweden     | WDV-[SE2]        | 2008/11/1       |
| FJ546178      | Barley | Czech Rep. | WDV-[CZ6482]     | 2009/4/28       |
| FJ546179      | Barley | Czech Rep. | WDV-[CZ1800]     | 2009/4/28       |
| FJ546180      | Barley | Czech Rep. | WDV-[CZ11105]    | 2009/4/28       |
| FJ546181      | Barley | Czech Rep. | WDV-[CZ11229]    | 2009/4/28       |
| FJ546191      | Wheat  | Czech Rep. | WDV-[CZ1841]     | 2009/4/28       |
| FJ546192      | Barley | Czech Rep. | WDV-[CZ7040]     | 2009/4/28       |
| FJ546193      | Barley | Czech Rep. | WDV-[CZWDV-B]    | 2009/4/28       |
| FJ546190      | Wheat  | Czech Rep. | WDV-[CZ6239]     | 2009/4/28       |
| FJ546189      | Wheat  | Czech Rep. | WDV-[CZ6217]     | 2009/4/28       |
| FJ546188      | Wheat  | Czech Rep. | WDV-[CZ1561]     | 2009/4/28       |
| FM999832      | Barley | Hungary    | WDV-[D01]        | 2009/2/19       |
| FM999833      | Barley | Hungary    | WDV-[HE]         | 2009/2/19       |
| FM210034      | Barley | Hungary    | WDV-[H07]        | 2008/9/13       |
| AM989927      | Barley | Bulgaria   | WDV-[Bg17]       | 2008/5/7        |
| FN806784      | Wheat  | Ukraine    | WDV-[Uk-Miron]   | 2010/4/21       |
| FN806785      | Wheat  | Hungary    | WDV-[HU2-Marton] | 2010/4/21       |
| FN806786      | Wheat  | Hungary    | WDV-HU-Pula      | 2010/4/21       |
| FN806787      | Wheat  | Ukraine    | WDV-Uk-Odessa    | 2010/4/21       |
| AM747816      | Barley | Hungary    | WDV-HU           | 2009/3/12       |
| AM942044      | Barley | Germany    | WDV-SxA57        | 2008/12/20      |
| AM942045      | Barley | Germany    | WDV-SxA36        | 2008/12/20      |
| AM921649      | Barley | Germany    | WDV-SABg12-11    | 2008/12/14      |
| HG422310      | Wheat  | Germany    | Leutewitz1       | 2013/5          |

|          |        |          |               |            |
|----------|--------|----------|---------------|------------|
| HG422316 | Wheat  | Germany  | Aschersleben1 | 2013/10/11 |
| HG422317 | Wheat  | Germany  | Alsleben3     | 2013/10/11 |
| HG422318 | Wheat  | Germany  | Alsleben9     | 2013/10/11 |
| HF968637 | Wheat  | France   | 68WDV_1       | 2013/10/11 |
| JN791095 | Wheat  | Iran     | Shahrekord    | 2012/2/4   |
| HF968633 | Wheat  | UK       | UK193WDV1     | 2013/10/11 |
| HG422314 | Wheat  | Germany  | Aschersleben3 | 2013/10/11 |
| HG422315 | Wheat  | Germany  | Krostitz1     | 2013/10/11 |
| HF968650 | Barley | Germany  | DE45BDV       | 2013/10/11 |
| AM922260 | Barely | Germany  | SA45EcoFL38   | 2013/4/4   |
| AM922261 | Barely | Germany  | SA43EcoFL23   | 2013/4/4   |
| AM922262 | Barely | Germany  | SA12EcoFL2    | 2013/4/4   |
| HF968639 | Barely | Spain    | ES1BDV_1      | 2013/10/11 |
| HF968641 | Barely | Spain    | ES2BDV_1      | 2013/10/11 |
| HF968644 | Barely | Spain    | ES3BDV_1      | 2013/10/11 |
| AM989927 | Barely | Bulgaria | Bg17          | 2008/5/7   |
| HF968646 | Barely | Austria  | AU196BDV1     | 2013/10/11 |
| FJ620684 | Barely | Iran     |               | 2013/3/15  |
| JN791096 | Barely | Iran     | Bavanat       | 2012/2/4   |

---



**Supplementary Table S4. Selection pressure of the different proteins of *Wheat dwarf virus*.**

| <b>Group</b>                     | <b>Protein</b> | <b><i>N</i>*</b> | <b><math>d_N</math></b> | <b><math>d_S</math></b> | <b><math>d_N/d_S</math></b> |
|----------------------------------|----------------|------------------|-------------------------|-------------------------|-----------------------------|
| <b>WDV-wheat-specific group</b>  | <b>CP</b>      | 184              | 0.00479                 | 0.04489                 | 0.10671                     |
|                                  | <b>MP</b>      | 184              | 0.00601                 | 0.03359                 | 0.17892                     |
|                                  | <b>Rep</b>     | 184              | 0.00466                 | 0.03306                 | 0.14096                     |
|                                  | <b>Rep A</b>   | 184              | 0.00550                 | 0.02662                 | 0.20661                     |
| <b>WDV-barley-specific group</b> | <b>CP</b>      | 24               | 0.00460                 | 0.04461                 | 0.10312                     |
|                                  | <b>MP</b>      | 24               | 0.00917                 | 0.00762                 | 1.20341                     |
|                                  | <b>Rep</b>     | 24               | 0.00610                 | 0.03146                 | 0.19340                     |
|                                  | <b>Rep A</b>   | 24               | 0.00751                 | 0.04284                 | 0.17530                     |
| <b>WDV</b>                       | <b>CP</b>      | 208              | 0.02212                 | 0.13123                 | 0.16856                     |
|                                  | <b>MP</b>      | 208              | 0.02622                 | 0.08440                 | 0.31066                     |
|                                  | <b>Rep</b>     | 208              | 0.01029                 | 0.09712                 | 0.10595                     |
|                                  | <b>Rep A</b>   | 208              | 0.01450                 | 0.07931                 | 0.18283                     |

\* *N*: isolate numbers;  $d_N$ : nonsynonymous substitution rate;  $d_S$ : synonymous substitution rate; Values of  $d_N/d_S < 1$ , = 1 or  $> 1$  indicate negative selection, neutral evolution and positive selection, respectively.

Supplementary Table S5. Selection analysis and coevolutionary site residues of intra and inter protein in WDV and BDV  
A. WDV-CP; B. WDV-MP; C. WDV-Rep; D. WDV-Rep A; E. BDV-CP; F. BDV-Rep; G. BDV-Rep A

A.

| Coevolutionary sites of inter-protein of CP and Rep | Coevolutionary sites of inter-protein of CP and Rep A | Coevolutionary sites of intra-protein | Codon# | Triplet | Syn (s) | Nonsyn (n) | Syn sites (S) | Nonsyn sites (N) | $d_S$  | $d_N$  | $d_N - d_S$ | P-value | Normalized $d_N - d_S$ |
|-----------------------------------------------------|-------------------------------------------------------|---------------------------------------|--------|---------|---------|------------|---------------|------------------|--------|--------|-------------|---------|------------------------|
|                                                     |                                                       |                                       | 1      | ATG     | 0       | 0          | 0             | 3                | 0      | 0      | 0           | 0       | 0                      |
|                                                     |                                                       |                                       | 2      | GTG     | 0       | 0          | 1             | 2                | 0      | 0      | 0           | 0       | 0                      |
|                                                     |                                                       |                                       | 3      | ACC     | 0       | 0          | 1             | 2                | 0      | 0      | 0           | 0       | 0                      |
|                                                     |                                                       |                                       | 4      | AAC     | 0       | 0          | 0.604154      | 2.39585          | 0      | 0      | 0           | 0       | 0                      |
|                                                     |                                                       |                                       | 5      | AAG     | 0       | 0          | 0.456094      | 2.16974          | 0      | 0      | 0           | 0       | 0                      |
|                                                     |                                                       |                                       | 6      | GAC     | 0       | 0          | 0.604154      | 2.39585          | 0      | 0      | 0           | 0       | 0                      |
|                                                     |                                                       |                                       | 7      | TCC     | 0       | 0          | 1             | 2                | 0      | 0      | 0           | 0       | 0                      |
|                                                     |                                                       |                                       | 8      | CGA     | 0       | 0          | 1.1627        | 1.23315          | 0      | 0      | 0           | 0       | 0                      |
|                                                     |                                                       |                                       | 9      | GGT     | 0       | 0          | 1             | 2                | 0      | 0      | 0           | 0       | 0                      |
|                                                     |                                                       |                                       | 10     | AAG     | 0       | 0          | 0.456094      | 2.16974          | 0      | 0      | 0           | 0       | 0                      |
|                                                     |                                                       |                                       | 11     | GGT     | 1       | 0          | 1             | 2                | 1      | 0      | -1          | 1       | -2.32188               |
|                                                     |                                                       |                                       | 12     | AAG     | 1       | 0          | 0.450855      | 2.17498          | 2.218  | 0      | -2.218      | 1       | -5.14995               |
|                                                     |                                                       |                                       | 13     | CGG     | 2       | 0          | 1.06134       | 1.93866          | 1.8844 | 0      | -1.8844     | 1       | -4.37536               |
|                                                     |                                                       |                                       | 14     | AAG     | 0       | 0          | 0.456094      | 2.16974          | 0      | 0      | 0           | 0       | 0                      |
| 15                                                  | 15                                                    |                                       | 15     | ATG     | 1.5     | 3.5        | 0.628247      | 2.37175          | 2.3876 | 1.4757 | -0.9119     | 0.8262  | -2.11731               |
|                                                     |                                                       |                                       | 16     | GAA     | 1       | 1          | 0.446725      | 2.35023          | 2.2385 | 0.4255 | -1.813      | 0.9745  | -4.20963               |
|                                                     |                                                       |                                       | 17     | GAA     | 1       | 0          | 0.434894      | 2.34446          | 2.2994 | 0      | -2.2994     | 1       | -5.33895               |
|                                                     |                                                       |                                       | 18     | GGT     | 3       | 1          | 1             | 1.95935          | 3      | 0.5104 | -2.4896     | 0.987   | -5.78061               |
|                                                     |                                                       |                                       | 19     | GAA     | 0       | 1          | 0.44129       | 2.35567          | 0      | 0.4245 | 0.42451     | 0.8422  | 0.985657               |

|  |  |  |    |     |   |   |          |         |        |        |         |        |          |
|--|--|--|----|-----|---|---|----------|---------|--------|--------|---------|--------|----------|
|  |  |  | 20 | TCC | 9 | 0 | 1        | 1.97853 | 9      | 0      | -9      | 1      | -20.8969 |
|  |  |  | 21 | AGC | 1 | 1 | 0.604865 | 2.39513 | 1.6533 | 0.4175 | -1.2358 | 0.9593 | -2.86926 |
|  |  |  | 22 | GGA | 0 | 1 | 0.999443 | 1.77968 | 0      | 0.5619 | 0.5619  | 0.6404 | 1.30466  |
|  |  |  | 23 | AGG | 1 | 0 | 0.648749 | 2.30141 | 1.5414 | 0      | -1.5414 | 1      | -3.57901 |
|  |  |  | 24 | TGG | 0 | 0 | 0        | 2.08781 | 0      | 0      | 0       | 0      | 0        |
|  |  |  | 25 | AAG | 0 | 0 | 0.456094 | 2.16974 | 0      | 0      | 0       | 0      | 0        |
|  |  |  | 26 | GGG | 0 | 0 | 1        | 2       | 0      | 0      | 0       | 0      | 0        |
|  |  |  | 27 | GCT | 0 | 0 | 1        | 2       | 0      | 0      | 0       | 0      | 0        |
|  |  |  | 28 | GTG | 0 | 0 | 1        | 2       | 0      | 0      | 0       | 0      | 0        |
|  |  |  | 29 | TAT | 0 | 1 | 0.575512 | 2.0019  | 0      | 0.4995 | 0.49953 | 0.7767 | 1.15984  |
|  |  |  | 30 | AAG | 0 | 0 | 0.456094 | 2.16974 | 0      | 0      | 0       | 0      | 0        |
|  |  |  | 31 | CGG | 0 | 0 | 1.1627   | 1.8373  | 0      | 0      | 0       | 0      | 0        |
|  |  |  | 32 | CGT | 0 | 0 | 1        | 2       | 0      | 0      | 0       | 0      | 0        |
|  |  |  | 33 | AAA | 0 | 0 | 0.429655 | 2.19618 | 0      | 0      | 0       | 0      | 0        |
|  |  |  | 34 | CAG | 0 | 0 | 0.456094 | 1.93975 | 0      | 0      | 0       | 0      | 0        |
|  |  |  | 35 | GCG | 1 | 4 | 1        | 2       | 1      | 2      | 1       | 0.4609 | 2.32188  |
|  |  |  | 36 | TAT | 3 | 0 | 0.584584 | 2       | 5.1319 | 0      | -5.1319 | 1      | -11.9155 |
|  |  |  | 37 | AAG | 0 | 0 | 0.456094 | 2.16974 | 0      | 0      | 0       | 0      | 0        |
|  |  |  | 38 | GTA | 0 | 0 | 1        | 2       | 0      | 0      | 0       | 0      | 0        |
|  |  |  | 39 | GTA | 0 | 2 | 1.00387  | 1.99613 | 0      | 1.0019 | 1.00194 | 0.4427 | 2.32638  |
|  |  |  | 40 | CCT | 1 | 0 | 1        | 2       | 1      | 0      | -1      | 1      | -2.32188 |
|  |  |  | 41 | GTG | 0 | 0 | 1        | 2       | 0      | 0      | 0       | 0      | 0        |
|  |  |  | 42 | AAG | 0 | 0 | 0.456094 | 2.16974 | 0      | 0      | 0       | 0      | 0        |
|  |  |  | 43 | CCC | 3 | 0 | 1        | 2       | 3      | 0      | -3      | 1      | -6.96564 |
|  |  |  | 44 | CCA | 1 | 0 | 1        | 2       | 1      | 0      | -1      | 1      | -2.32188 |

|  |  |  |    |     |    |   |          |         |        |        |         |        |           |
|--|--|--|----|-----|----|---|----------|---------|--------|--------|---------|--------|-----------|
|  |  |  | 45 | GCT | 0  | 1 | 0.998101 | 2.0019  | 0      | 0.4995 | 0.49953 | 0.6673 | 1.15984   |
|  |  |  | 46 | CTC | 10 | 0 | 1.17778  | 1.82222 | 8.4906 | 0      | -8.4906 | 1      | -19.714   |
|  |  |  | 47 | TGC | 1  | 0 | 0.595982 | 2.20988 | 1.6779 | 0      | -1.6779 | 1      | -3.89589  |
|  |  |  | 48 | GTA | 2  | 0 | 1        | 2       | 2      | 0      | -2      | 1      | -4.64376  |
|  |  |  | 49 | TTC | 2  | 3 | 0.598854 | 2.36197 | 3.3397 | 1.2701 | -2.0696 | 0.9403 | -4.80532  |
|  |  |  | 50 | CGC | 1  | 0 | 1.04642  | 1.95358 | 0.9556 | 0      | -0.9556 | 1      | -2.21888  |
|  |  |  | 51 | TAC | 0  | 0 | 0.604154 | 2       | 0      | 0      | 0       | 0      | 0         |
|  |  |  | 52 | AAC | 2  | 0 | 0.603941 | 2.39606 | 3.3116 | 0      | -3.3116 | 1      | -7.6891   |
|  |  |  | 53 | TGG | 0  | 0 | 0        | 2.08781 | 0      | 0      | 0       | 0      | 0         |
|  |  |  | 54 | TTG | 1  | 0 | 1.07728  | 1.6716  | 0.9283 | 0      | -0.9283 | 1      | -2.15532  |
|  |  |  | 55 | AAT | 0  | 0 | 0.575512 | 2.42449 | 0      | 0      | 0       | 0      | 0         |
|  |  |  | 56 | AGC | 1  | 3 | 0.635689 | 2.35998 | 1.5731 | 1.2712 | -0.3019 | 0.8002 | -0.700977 |
|  |  |  | 57 | GAC | 1  | 0 | 0.604026 | 2.39597 | 1.6556 | 0      | -1.6556 | 1      | -3.844    |
|  |  |  | 58 | AGG | 0  | 1 | 0.636621 | 2.33353 | 0      | 0.4285 | 0.42854 | 0.7857 | 0.995007  |
|  |  |  | 59 | ACC | 0  | 0 | 1        | 2       | 0      | 0      | 0       | 0      | 0         |
|  |  |  | 60 | AAT | 2  | 0 | 0.583942 | 2.41606 | 3.425  | 0      | -3.425  | 1      | -7.95243  |
|  |  |  | 61 | GTT | 2  | 2 | 0.87906  | 2.12094 | 2.2752 | 0.943  | -1.3322 | 0.9215 | -3.09316  |
|  |  |  | 62 | GTT | 1  | 0 | 1        | 2       | 1      | 0      | -1      | 1      | -2.32188  |
|  |  |  | 63 | GTG | 0  | 1 | 1        | 2       | 0      | 0.5    | 0.5     | 0.6667 | 1.16094   |
|  |  |  | 64 | GGT | 0  | 0 | 1        | 2       | 0      | 0      | 0       | 0      | 0         |
|  |  |  | 65 | AAT | 1  | 0 | 0.583684 | 2.41632 | 1.7133 | 0      | -1.7133 | 1      | -3.97797  |
|  |  |  | 66 | ACA | 1  | 0 | 1        | 2       | 1      | 0      | -1      | 1      | -2.32188  |
|  |  |  | 67 | CCC | 1  | 1 | 1        | 2       | 1      | 0.5    | -0.5    | 0.8889 | -1.16094  |
|  |  |  | 68 | CGG | 1  | 0 | 1.1627   | 1.66493 | 0.8601 | 0      | -0.8601 | 1      | -1.99698  |
|  |  |  | 69 | GTC | 3  | 0 | 1        | 2       | 3      | 0      | -3      | 1      | -6.96564  |

|  |  |  |    |     |   |   |          |         |        |        |         |        |          |
|--|--|--|----|-----|---|---|----------|---------|--------|--------|---------|--------|----------|
|  |  |  | 70 | GAT | 0 | 0 | 0.575512 | 2.42449 | 0      | 0      | 0       | 0      | 0        |
|  |  |  | 71 | CTG | 1 | 0 | 1.6033   | 1.39629 | 0.6237 | 0      | -0.6237 | 1      | -1.44819 |
|  |  |  | 72 | ATT | 0 | 0 | 0.848405 | 2.1516  | 0      | 0      | 0       | 0      | 0        |
|  |  |  | 73 | ACC | 1 | 0 | 1        | 2       | 1      | 0      | -1      | 1      | -2.32188 |
|  |  |  | 74 | TGT | 1 | 0 | 0.583684 | 2.17486 | 1.7133 | 0      | -1.7133 | 1      | -3.97797 |
|  |  |  | 75 | TTT | 1 | 1 | 0.580974 | 2.41903 | 1.7213 | 0.4134 | -1.3079 | 0.9625 | -3.03669 |
|  |  |  | 76 | GCT | 2 | 0 | 1        | 2       | 2      | 0      | -2      | 1      | -4.64376 |
|  |  |  | 77 | CAG | 1 | 2 | 0.611081 | 1.97299 | 1.6364 | 1.0137 | -0.6228 | 0.8587 | -1.44596 |
|  |  |  | 78 | GGT | 0 | 0 | 1        | 2       | 0      | 0      | 0       | 0      | 0        |
|  |  |  | 79 | AAG | 0 | 0 | 0.456094 | 2.16974 | 0      | 0      | 0       | 0      | 0        |
|  |  |  | 80 | GCC | 0 | 0 | 1        | 2       | 0      | 0      | 0       | 0      | 0        |
|  |  |  | 81 | GAT | 0 | 0 | 0.575512 | 2.42449 | 0      | 0      | 0       | 0      | 0        |
|  |  |  | 82 | AAT | 1 | 0 | 0.577797 | 2.4222  | 1.7307 | 0      | -1.7307 | 1      | -4.0185  |
|  |  |  | 83 | AAT | 0 | 0 | 0.575512 | 2.42449 | 0      | 0      | 0       | 0      | 0        |
|  |  |  | 84 | CGG | 1 | 0 | 1.16197  | 1.83803 | 0.8606 | 0      | -0.8606 | 1      | -1.99823 |
|  |  |  | 85 | CAT | 0 | 0 | 0.575512 | 2.42449 | 0      | 0      | 0       | 0      | 0        |
|  |  |  | 86 | ACA | 0 | 0 | 1        | 2       | 0      | 0      | 0       | 0      | 0        |
|  |  |  | 87 | AAT | 0 | 0 | 0.575512 | 2.42449 | 0      | 0      | 0       | 0      | 0        |
|  |  |  | 88 | CAG | 2 | 0 | 0.455937 | 1.93991 | 4.3866 | 0      | -4.3866 | 1      | -10.1851 |
|  |  |  | 89 | ACC | 2 | 0 | 1        | 2       | 2      | 0      | -2      | 1      | -4.64376 |
|  |  |  | 90 | GTC | 0 | 0 | 1        | 2       | 0      | 0      | 0       | 0      | 0        |
|  |  |  | 91 | CTA | 2 | 0 | 1.55507  | 1.4443  | 1.2861 | 0      | -1.2861 | 1      | -2.98621 |
|  |  |  | 92 | TAC | 0 | 0 | 0.604154 | 2       | 0      | 0      | 0       | 0      | 0        |
|  |  |  | 93 | AAA | 1 | 0 | 0.437198 | 2.18863 | 2.2873 | 0      | -2.2873 | 1      | -5.31081 |
|  |  |  | 94 | TTT | 1 | 0 | 0.583684 | 2.41632 | 1.7133 | 0      | -1.7133 | 1      | -3.97797 |

|     |     |  |     |     |   |   |          |         |        |        |         |        |           |
|-----|-----|--|-----|-----|---|---|----------|---------|--------|--------|---------|--------|-----------|
|     |     |  | 95  | AAC | 0 | 5 | 0.604154 | 2.39585 | 0      | 2.087  | 2.08695 | 0.3249 | 4.84564   |
|     |     |  | 96  | ATA | 0 | 0 | 0.570345 | 2.42965 | 0      | 0      | 0       | 0      | 0         |
|     |     |  | 97  | CAG | 0 | 0 | 0.456094 | 1.93975 | 0      | 0      | 0       | 0      | 0         |
|     |     |  | 98  | GGT | 1 | 0 | 1        | 2       | 1      | 0      | -1      | 1      | -2.32188  |
|     |     |  | 99  | ACC | 0 | 0 | 1        | 2       | 0      | 0      | 0       | 0      | 0         |
|     |     |  | 100 | TGC | 1 | 1 | 0.595982 | 2.21037 | 1.6779 | 0.4524 | -1.2255 | 0.9549 | -2.84544  |
|     |     |  | 101 | TAT | 2 | 0 | 0.583727 | 2       | 3.4263 | 0      | -3.4263 | 1      | -7.95536  |
|     |     |  | 102 | ATG | 0 | 1 | 0.285316 | 2.71468 | 0      | 0.3684 | 0.36837 | 0.9049 | 0.855303  |
|     |     |  | 103 | TCC | 1 | 1 | 1        | 1.96656 | 1      | 0.5085 | -0.4915 | 0.8864 | -1.1412   |
|     |     |  | 104 | GAT | 1 | 0 | 0.577797 | 2.4222  | 1.7307 | 0      | -1.7307 | 1      | -4.0185   |
|     |     |  | 105 | GCA | 0 | 1 | 1        | 2       | 0      | 0.5    | 0.5     | 0.6667 | 1.16094   |
|     |     |  | 106 | TCA | 1 | 1 | 1        | 1.60662 | 1      | 0.6224 | -0.3776 | 0.8528 | -0.876685 |
|     |     |  | 107 | GCT | 0 | 1 | 1        | 2       | 0      | 0.5    | 0.5     | 0.6667 | 1.16094   |
| 108 | 108 |  | 108 | CCG | 0 | 3 | 0.826499 | 2.1735  | 0      | 1.3803 | 1.38026 | 0.3803 | 3.2048    |
| 109 | 109 |  | 109 | TTC | 1 | 2 | 0.605221 | 2.36194 | 1.6523 | 0.8468 | -0.8055 | 0.8922 | -1.87033  |
|     |     |  | 110 | ATC | 2 | 1 | 0.752454 | 2.24755 | 2.658  | 0.4449 | -2.213  | 0.9842 | -5.13841  |
|     |     |  | 111 | GGT | 1 | 0 | 1        | 2       | 1      | 0      | -1      | 1      | -2.32188  |
|     |     |  | 112 | CCA | 1 | 0 | 1        | 2       | 1      | 0      | -1      | 1      | -2.32188  |
|     |     |  | 113 | GTC | 1 | 1 | 0.917803 | 2.0822  | 1.0896 | 0.4803 | -0.6093 | 0.9064 | -1.41471  |
|     |     |  | 114 | CGC | 1 | 0 | 1.04642  | 1.95358 | 0.9556 | 0      | -0.9556 | 1      | -2.21888  |
|     |     |  | 115 | CTC | 2 | 1 | 1        | 2       | 2      | 0.5    | -1.5    | 0.963  | -3.48282  |
|     |     |  | 116 | TAC | 2 | 0 | 0.595598 | 2       | 3.358  | 0      | -3.358  | 1      | -7.7968   |
|     |     |  | 117 | CAC | 1 | 0 | 0.604112 | 2.39589 | 1.6553 | 0      | -1.6553 | 1      | -3.84346  |
|     |     |  | 118 | TGG | 0 | 0 | 0        | 2.08781 | 0      | 0      | 0       | 0      | 0         |
|     |     |  | 119 | TTA | 1 | 0 | 1.01271  | 1.60605 | 0.9874 | 0      | -0.9874 | 1      | -2.29274  |

|     |     |     |     |     |    |   |          |         |        |        |         |        |          |
|-----|-----|-----|-----|-----|----|---|----------|---------|--------|--------|---------|--------|----------|
|     |     |     | 120 | GTC | 0  | 0 | 1        | 2       | 0      | 0      | 0       | 0      | 0        |
|     |     |     | 121 | TAT | 0  | 0 | 0.575512 | 2       | 0      | 0      | 0       | 0      | 0        |
|     |     |     | 122 | GAT | 0  | 0 | 0.575512 | 2.42449 | 0      | 0      | 0       | 0      | 0        |
|     |     |     | 123 | GCA | 0  | 0 | 1        | 2       | 0      | 0      | 0       | 0      | 0        |
|     |     |     | 124 | GAG | 0  | 1 | 0.458532 | 2.32181 | 0      | 0.4307 | 0.4307  | 0.8351 | 1.00003  |
|     |     |     | 125 | CTG | 1  | 1 | 1.0018   | 1.9982  | 0.9982 | 0.5005 | -0.4978 | 0.8885 | -1.15572 |
|     |     |     | 126 | AAA | 0  | 0 | 0.429655 | 2.19618 | 0      | 0      | 0       | 0      | 0        |
|     |     |     | 127 | CAG | 0  | 0 | 0.456094 | 1.93975 | 0      | 0      | 0       | 0      | 0        |
|     |     |     | 128 | GCA | 12 | 0 | 1        | 2       | 12     | 0      | -12     | 1      | -27.8625 |
|     |     |     | 129 | ATG | 0  | 1 | 0.285316 | 2.71468 | 0      | 0.3684 | 0.36837 | 0.9049 | 0.855303 |
|     |     |     | 130 | CCA | 1  | 0 | 1        | 2       | 1      | 0      | -1      | 1      | -2.32188 |
|     |     |     | 131 | GAC | 0  | 1 | 0.603632 | 2.39571 | 0      | 0.4174 | 0.41741 | 0.7987 | 0.969183 |
| 132 | 132 | 132 | 132 | GCC | 0  | 2 | 1        | 2       | 0      | 1      | 1       | 0.4444 | 2.32188  |
|     |     |     | 133 | ACT | 0  | 0 | 1        | 2       | 0      | 0      | 0       | 0      | 0        |
|     |     |     | 134 | GAC | 0  | 1 | 0.605926 | 2.39407 | 0      | 0.4177 | 0.4177  | 0.798  | 0.969844 |
|     |     |     | 135 | ATC | 0  | 0 | 0.766852 | 2.23315 | 0      | 0      | 0       | 0      | 0        |
|     |     |     | 136 | TTT | 0  | 0 | 0.575512 | 2.42449 | 0      | 0      | 0       | 0      | 0        |
|     |     |     | 137 | ACG | 0  | 0 | 1        | 2       | 0      | 0      | 0       | 0      | 0        |
|     |     |     | 138 | ATG | 0  | 0 | 0        | 3       | 0      | 0      | 0       | 0      | 0        |
|     |     |     | 139 | CCT | 4  | 0 | 1        | 2       | 4      | 0      | -4      | 1      | -9.28752 |
|     |     |     | 140 | TGG | 0  | 0 | 0        | 2.08781 | 0      | 0      | 0       | 0      | 0        |
|     |     |     | 141 | AAT | 0  | 0 | 0.575512 | 2.42449 | 0      | 0      | 0       | 0      | 0        |
|     |     |     | 142 | CTG | 0  | 0 | 1.60415  | 1.39585 | 0      | 0      | 0       | 0      | 0        |
|     |     |     | 143 | CTG | 3  | 0 | 1.59561  | 1.40032 | 1.8802 | 0      | -1.8802 | 1      | -4.3655  |
|     |     |     | 144 | CCG | 0  | 0 | 1        | 2       | 0      | 0      | 0       | 0      | 0        |



|     |     |     |     |     |   |   |          |         |        |        |         |        |           |
|-----|-----|-----|-----|-----|---|---|----------|---------|--------|--------|---------|--------|-----------|
|     |     |     | 145 | AGT | 0 | 0 | 0.575512 | 2.42449 | 0      | 0      | 0       | 0      | 0         |
| 146 | 146 | 146 | 146 | ACG | 1 | 2 | 0.998511 | 1.95507 | 1.0015 | 1.023  | 0.02149 | 0.7344 | 0.0498985 |
|     |     |     | 147 | TGG | 0 | 0 | 0        | 2.08781 | 0      | 0      | 0       | 0      | 0         |
|     |     |     | 148 | ACT | 4 | 0 | 1        | 2       | 4      | 0      | -4      | 1      | -9.28752  |
|     |     |     | 149 | GTG | 0 | 0 | 1        | 2       | 0      | 0      | 0       | 0      | 0         |
|     |     |     | 150 | CAA | 2 | 0 | 0.431882 | 1.96396 | 4.6309 | 0      | -4.6309 | 1      | -10.7524  |
|     |     |     | 151 | CGT | 2 | 0 | 1.0057   | 1.9943  | 1.9887 | 0      | -1.9887 | 1      | -4.61743  |
|     |     |     | 152 | GCT | 0 | 0 | 1        | 2       | 0      | 0      | 0       | 0      | 0         |
|     |     |     | 153 | TGG | 0 | 0 | 0        | 2.08781 | 0      | 0      | 0       | 0      | 0         |
|     |     |     | 154 | TCG | 0 | 1 | 1        | 1.84508 | 0      | 0.542  | 0.54198 | 0.6485 | 1.25842   |
|     |     |     | 155 | CAT | 0 | 1 | 0.574859 | 2.42244 | 0      | 0.4128 | 0.41281 | 0.8082 | 0.95849   |
|     |     |     | 156 | CGA | 1 | 0 | 1.1627   | 1.40552 | 0.8601 | 0      | -0.8601 | 1      | -1.99698  |
|     |     |     | 157 | TTC | 0 | 0 | 0.604154 | 2.39585 | 0      | 0      | 0       | 0      | 0         |
|     |     |     | 158 | GTG | 0 | 0 | 1        | 2       | 0      | 0      | 0       | 0      | 0         |
|     |     |     | 159 | GTG | 0 | 0 | 1        | 2       | 0      | 0      | 0       | 0      | 0         |
|     |     |     | 160 | AAA | 1 | 0 | 0.437198 | 2.18863 | 2.2873 | 0      | -2.2873 | 1      | -5.31081  |
|     |     |     | 161 | AGG | 0 | 0 | 0.652271 | 2.34773 | 0      | 0      | 0       | 0      | 0         |
|     |     |     | 162 | AAG | 0 | 0 | 0.456094 | 2.16974 | 0      | 0      | 0       | 0      | 0         |
|     |     |     | 163 | TGG | 0 | 0 | 0        | 2.08781 | 0      | 0      | 0       | 0      | 0         |
|     |     |     | 164 | ACC | 0 | 2 | 0.887059 | 2.07325 | 0      | 0.9647 | 0.96467 | 0.4905 | 2.23985   |
|     |     |     | 165 | GCG | 0 | 1 | 1        | 2       | 0      | 0.5    | 0.5     | 0.6667 | 1.16094   |
|     |     |     | 166 | AAC | 0 | 1 | 0.605927 | 2.39407 | 0      | 0.4177 | 0.4177  | 0.798  | 0.969845  |
|     |     |     | 167 | CTT | 1 | 0 | 1.0027   | 1.9973  | 0.9973 | 0      | -0.9973 | 1      | -2.31563  |
|     |     |     | 168 | GTT | 1 | 0 | 1        | 2       | 1      | 0      | -1      | 1      | -2.32188  |
|     |     |     | 169 | ACT | 1 | 1 | 1        | 2       | 1      | 0.5    | -0.5    | 0.8889 | -1.16094  |

|     |     |  |     |     |     |     |          |         |        |        |         |        |          |
|-----|-----|--|-----|-----|-----|-----|----------|---------|--------|--------|---------|--------|----------|
|     |     |  | 170 | GAT | 0   | 0   | 0.575512 | 2.42449 | 0      | 0      | 0       | 0      | 0        |
|     |     |  | 171 | GGA | 1   | 0   | 1        | 1.79696 | 1      | 0      | -1      | 1      | -2.32188 |
|     |     |  | 172 | CGG | 2   | 1   | 1.00141  | 1.96693 | 1.9972 | 0.5084 | -1.4888 | 0.9616 | -3.45674 |
|     |     |  | 173 | AAG | 0   | 1   | 0.45668  | 2.17027 | 0      | 0.4608 | 0.46077 | 0.8262 | 1.06986  |
|     |     |  | 174 | GTC | 2   | 0   | 1        | 2       | 2      | 0      | -2      | 1      | -4.64376 |
|     |     |  | 175 | GGG | 1   | 0   | 1        | 1.9824  | 1      | 0      | -1      | 1      | -2.32188 |
|     |     |  | 176 | TCT | 5   | 0   | 1        | 1.99421 | 5      | 0      | -5      | 1      | -11.6094 |
| 178 | 178 |  | 177 | AAG | 1   | 1   | 0.456599 | 2.1696  | 2.1901 | 0.4609 | -1.7292 | 0.9698 | -4.01497 |
|     |     |  | 178 | ACC | 1   | 3   | 1        | 1.98702 | 1      | 1.5098 | 0.5098  | 0.59   | 1.18369  |
|     |     |  | 179 | GTT | 1   | 0   | 1        | 2       | 1      | 0      | -1      | 1      | -2.32188 |
|     |     |  | 180 | GAC | 2   | 0   | 0.601784 | 2.39822 | 3.3235 | 0      | -3.3235 | 1      | -7.71665 |
|     |     |  | 181 | CAA | 1.5 | 1.5 | 0.598677 | 1.99452 | 2.5055 | 0.7521 | -1.7535 | 0.9262 | -4.07134 |
|     |     |  | 182 | CGC | 2   | 0   | 1.00049  | 1.99771 | 1.999  | 0      | -1.999  | 1      | -4.6415  |
|     |     |  | 183 | TAC | 0   | 1   | 0.604154 | 2.00118 | 0      | 0.4997 | 0.49971 | 0.7681 | 1.16026  |
|     |     |  | 184 | AAC | 0   | 0   | 0.604154 | 2.39585 | 0      | 0      | 0       | 0      | 0        |
|     |     |  | 185 | TGG | 0   | 2   | 0.197351 | 2.0784  | 0      | 0.9623 | 0.96228 | 0.8341 | 2.23429  |
|     |     |  | 186 | GTA | 0   | 0   | 1        | 2       | 0      | 0      | 0       | 0      | 0        |
|     |     |  | 187 | GTC | 4   | 1   | 1        | 2       | 4      | 0.5    | -3.5    | 0.9959 | -8.12658 |
|     |     |  | 188 | GGC | 3   | 0   | 1        | 2       | 3      | 0      | -3      | 1      | -6.96564 |
|     |     |  | 189 | AAG | 1   | 0   | 0.456055 | 2.16978 | 2.1927 | 0      | -2.1927 | 1      | -5.09122 |
|     |     |  | 190 | AAT | 0   | 1   | 0.575512 | 2.42449 | 0      | 0.4125 | 0.41246 | 0.8082 | 0.957678 |
|     |     |  | 191 | ATC | 2   | 0   | 0.790606 | 2.20939 | 2.5297 | 0      | -2.5297 | 1      | -5.87367 |
|     |     |  | 192 | GTG | 3   | 0   | 1        | 2       | 3      | 0      | -3      | 1      | -6.96564 |
|     |     |  | 193 | GAC | 0   | 1   | 0.604154 | 2.3955  | 0      | 0.4174 | 0.41745 | 0.7986 | 0.969267 |
|     |     |  | 194 | GCA | 6   | 0   | 1        | 2       | 6      | 0      | -6      | 1      | -13.9313 |

|  |  |  |     |     |   |   |          |         |        |        |         |        |          |
|--|--|--|-----|-----|---|---|----------|---------|--------|--------|---------|--------|----------|
|  |  |  | 195 | AGT | 4 | 5 | 0.632373 | 2.3633  | 6.3254 | 2.1157 | -4.2097 | 0.9754 | -9.7744  |
|  |  |  | 196 | AAG | 0 | 0 | 0.456094 | 2.16974 | 0      | 0      | 0       | 0      | 0        |
|  |  |  | 197 | TTC | 0 | 0 | 0.604154 | 2.39585 | 0      | 0      | 0       | 0      | 0        |
|  |  |  | 198 | TTC | 1 | 1 | 0.604112 | 2.34947 | 1.6553 | 0.4256 | -1.2297 | 0.9582 | -2.8552  |
|  |  |  | 199 | AAA | 0 | 0 | 0.429655 | 2.19618 | 0      | 0      | 0       | 0      | 0        |
|  |  |  | 200 | GGT | 0 | 0 | 1        | 2       | 0      | 0      | 0       | 0      | 0        |
|  |  |  | 201 | TTG | 1 | 0 | 1.03416  | 1.69416 | 0.967  | 0      | -0.967  | 1      | -2.24517 |
|  |  |  | 202 | CGT | 2 | 0 | 1.04642  | 1.95358 | 1.9113 | 0      | -1.9113 | 1      | -4.43776 |
|  |  |  | 203 | GTC | 0 | 0 | 1        | 2       | 0      | 0      | 0       | 0      | 0        |
|  |  |  | 204 | ACG | 0 | 0 | 1        | 2       | 0      | 0      | 0       | 0      | 0        |
|  |  |  | 205 | ACG | 0 | 1 | 1        | 2       | 0      | 0.5    | 0.5     | 0.6667 | 1.16094  |
|  |  |  | 206 | GAG | 0 | 0 | 0.456094 | 2.32326 | 0      | 0      | 0       | 0      | 0        |
|  |  |  | 207 | TGG | 0 | 0 | 0        | 2.08781 | 0      | 0      | 0       | 0      | 0        |
|  |  |  | 208 | ATG | 0 | 0 | 0        | 3       | 0      | 0      | 0       | 0      | 0        |
|  |  |  | 209 | AAC | 0 | 0 | 0.604154 | 2.39585 | 0      | 0      | 0       | 0      | 0        |
|  |  |  | 210 | ACG | 0 | 0 | 1        | 2       | 0      | 0      | 0       | 0      | 0        |
|  |  |  | 211 | GGT | 0 | 0 | 1        | 2       | 0      | 0      | 0       | 0      | 0        |
|  |  |  | 212 | GAC | 1 | 1 | 0.603806 | 2.39587 | 1.6562 | 0.4174 | -1.2388 | 0.9595 | -2.87629 |
|  |  |  | 213 | GGC | 3 | 1 | 0.998819 | 2.00118 | 3.0036 | 0.4997 | -2.5038 | 0.9877 | -5.81362 |
|  |  |  | 214 | AAG | 0 | 0 | 0.456094 | 2.16974 | 0      | 0      | 0       | 0      | 0        |
|  |  |  | 215 | ATA | 0 | 0 | 0.570345 | 2.42965 | 0      | 0      | 0       | 0      | 0        |
|  |  |  | 216 | GGC | 0 | 0 | 1        | 2       | 0      | 0      | 0       | 0      | 0        |
|  |  |  | 217 | GAC | 0 | 0 | 0.604154 | 2.39585 | 0      | 0      | 0       | 0      | 0        |
|  |  |  | 218 | ATT | 0 | 0 | 0.848405 | 2.1516  | 0      | 0      | 0       | 0      | 0        |
|  |  |  | 219 | AAG | 0 | 0 | 0.456094 | 2.16974 | 0      | 0      | 0       | 0      | 0        |

|     |     |  |     |     |     |     |          |         |        |        |         |        |           |
|-----|-----|--|-----|-----|-----|-----|----------|---------|--------|--------|---------|--------|-----------|
|     |     |  | 220 | AAG | 2   | 0   | 0.453201 | 2.17263 | 4.4131 | 0      | -4.4131 | 1      | -10.2466  |
|     |     |  | 221 | GGA | 2   | 0   | 1        | 1.84231 | 2      | 0      | -2      | 1      | -4.64376  |
|     |     |  | 222 | GCT | 3   | 0   | 1        | 2       | 3      | 0      | -3      | 1      | -6.96564  |
|     |     |  | 223 | CTG | 0   | 0   | 1.60415  | 1.39585 | 0      | 0      | 0       | 0      | 0         |
|     |     |  | 224 | TAT | 0   | 0   | 0.575512 | 2       | 0      | 0      | 0       | 0      | 0         |
|     |     |  | 225 | CTT | 5   | 0   | 1.0527   | 1.9473  | 4.7497 | 0      | -4.7497 | 1      | -11.0282  |
|     |     |  | 226 | ATT | 2   | 0   | 0.767868 | 2.23213 | 2.6046 | 0      | -2.6046 | 1      | -6.0476   |
|     |     |  | 227 | AGC | 1.5 | 1.5 | 0.63494  | 2.35511 | 2.3624 | 0.6369 | -1.7255 | 0.9371 | -4.00644  |
|     |     |  | 228 | AGT | 0   | 1   | 0.575512 | 2.40272 | 0      | 0.4162 | 0.4162  | 0.8068 | 0.966355  |
|     |     |  | 229 | ACT | 0   | 0   | 1        | 2       | 0      | 0      | 0       | 0      | 0         |
|     |     |  | 230 | CGT | 1   | 1   | 0.97314  | 1.9909  | 1.0276 | 0.5023 | -0.5253 | 0.8922 | -1.21972  |
|     |     |  | 231 | GGT | 1   | 0   | 1        | 1.99901 | 1      | 0      | -1      | 1      | -2.32188  |
|     |     |  | 232 | GGT | 0   | 0   | 1        | 2       | 0      | 0      | 0       | 0      | 0         |
|     |     |  | 233 | GTT | 3   | 0   | 1        | 2       | 3      | 0      | -3      | 1      | -6.96564  |
|     |     |  | 234 | ACT | 0   | 1   | 0.966138 | 2.03386 | 0      | 0.4917 | 0.49168 | 0.678  | 1.14161   |
|     |     |  | 235 | GGT | 1   | 0   | 1        | 1.99967 | 1      | 0      | -1      | 1      | -2.32188  |
|     |     |  | 236 | GAC | 5   | 0   | 0.600709 | 2.39929 | 8.3235 | 0      | -8.3235 | 1      | -19.3262  |
|     |     |  | 237 | AGT | 0   | 0   | 0.575512 | 2.42449 | 0      | 0      | 0       | 0      | 0         |
|     |     |  | 238 | GCC | 0   | 1   | 1        | 2       | 0      | 0.5    | 0.5     | 0.6667 | 1.16094   |
|     |     |  | 239 | TCT | 0   | 0   | 1        | 2       | 0      | 0      | 0       | 0      | 0         |
| 240 | 240 |  | 240 | ACG | 1   | 2   | 0.842652 | 2.15735 | 1.1867 | 0.9271 | -0.2597 | 0.8076 | -0.602914 |
|     |     |  | 241 | GCG | 0   | 1   | 1        | 1.95358 | 0      | 0.5119 | 0.51188 | 0.6614 | 1.18853   |
|     |     |  | 242 | TTT | 1   | 0   | 0.583684 | 2.41632 | 1.7133 | 0      | -1.7133 | 1      | -3.97797  |
|     |     |  | 243 | GAT | 0   | 1   | 0.533897 | 2.40315 | 0      | 0.4161 | 0.41612 | 0.8182 | 0.966182  |
|     |     |  | 244 | GTT | 0   | 0   | 1        | 2       | 0      | 0      | 0       | 0      | 0         |

|  |  |  |     |     |   |   |          |         |        |     |         |        |          |
|--|--|--|-----|-----|---|---|----------|---------|--------|-----|---------|--------|----------|
|  |  |  | 245 | GTA | 0 | 0 | 1        | 2       | 0      | 0   | 0       | 0      | 0        |
|  |  |  | 246 | TGT | 0 | 0 | 0.575512 | 2.1516  | 0      | 0   | 0       | 0      | 0        |
|  |  |  | 247 | GCC | 0 | 0 | 1        | 2       | 0      | 0   | 0       | 0      | 0        |
|  |  |  | 248 | TAT | 0 | 0 | 0.575512 | 2       | 0      | 0   | 0       | 0      | 0        |
|  |  |  | 249 | ACG | 0 | 0 | 1        | 2       | 0      | 0   | 0       | 0      | 0        |
|  |  |  | 250 | CAC | 0 | 0 | 0.604154 | 2.39585 | 0      | 0   | 0       | 0      | 0        |
|  |  |  | 251 | GCG | 0 | 0 | 1        | 2       | 0      | 0   | 0       | 0      | 0        |
|  |  |  | 252 | TGT | 0 | 0 | 0.575512 | 2.1516  | 0      | 0   | 0       | 0      | 0        |
|  |  |  | 253 | TAT | 3 | 0 | 0.579149 | 2       | 5.18   | 0   | -5.18   | 1      | -12.0274 |
|  |  |  | 254 | TTC | 1 | 0 | 0.604026 | 2.39597 | 1.6556 | 0   | -1.6556 | 1      | -3.844   |
|  |  |  | 255 | AAA | 0 | 0 | 0.429655 | 2.19618 | 0      | 0   | 0       | 0      | 0        |
|  |  |  | 256 | GCC | 1 | 1 | 1        | 2       | 1      | 0.5 | -0.5    | 0.8889 | -1.16094 |
|  |  |  | 257 | ATC | 4 | 0 | 0.7908   | 2.2092  | 5.0582 | 0   | -5.0582 | 1      | -11.7445 |
|  |  |  | 258 | GGC | 2 | 0 | 1        | 2       | 2      | 0   | -2      | 1      | -4.64376 |
|  |  |  | 259 | ATT | 0 | 0 | 0.848405 | 2.1516  | 0      | 0   | 0       | 0      | 0        |
|  |  |  | 260 | CAG | 1 | 0 | 0.448551 | 1.94729 | 2.2294 | 0   | -2.2294 | 1      | -5.1764  |

B.

| Coevolutionary sites of intra-protein | Codon# | Triplet | Syn (s) | Nonsyn (n) | Syn sites (S) | Nonsyn sites (N) | $d_S$  | $d_N$  | $d_N - d_S$ | P-value | Normalized $d_N - d_S$ |
|---------------------------------------|--------|---------|---------|------------|---------------|------------------|--------|--------|-------------|---------|------------------------|
|                                       | 1      | ATG     | 0       | 0          | 0             | 3                | 0      | 0      | 0           | 0       | 0                      |
|                                       | 2      | GAG     | 0       | 1          | 0.441159      | 2.23854          | 0      | 0.4467 | 0.44672     | 0.8354  | 1.1235                 |
|                                       | 3      | CAG     | 1       | 3          | 0.494701      | 1.94741          | 2.0214 | 1.5405 | -0.4809     | 0.8152  | -1.2095                |
|                                       | 4      | GCA     | 0       | 2          | 1             | 2                | 0      | 1      | 1           | 0.4444  | 2.51499                |
|                                       | 5      | ATC     | 1.5     | 1.5        | 0.714051      | 2.27253          | 2.1007 | 0.6601 | -1.4406     | 0.9211  | -3.62318               |
|                                       | 6      | GCC     | 1       | 2          | 1             | 2                | 1      | 1      | 0           | 0.7407  | 0                      |
|                                       | 7      | CCC     | 1       | 1          | 1             | 2                | 1      | 0.5    | -0.5        | 0.8889  | -1.2575                |
|                                       | 8      | CCG     | 0       | 1          | 1.00296       | 1.99704          | 0      | 0.5007 | 0.50074     | 0.6657  | 1.25936                |
|                                       | 9      | CTT     | 0       | 1          | 1             | 2                | 0      | 0.5    | 0.5         | 0.6667  | 1.2575                 |
|                                       | 10     | CCT     | 0       | 1          | 1             | 2                | 0      | 0.5    | 0.5         | 0.6667  | 1.2575                 |
|                                       | 11     | ATA     | 0       | 0          | 0.616289      | 2.38371          | 0      | 0      | 0           | 0       | 0                      |
|                                       | 12     | CGG     | 0       | 0          | 1.22056       | 1.77944          | 0      | 0      | 0           | 0       | 0                      |
| 13                                    | 13     | GAC     | 1.5     | 4.5        | 0.744348      | 2.24583          | 2.0152 | 2.0037 | -0.0115     | 0.6844  | -0.0288515             |
|                                       | 14     | TAT     | 0       | 1          | 0.578713      | 2.13516          | 0      | 0.4683 | 0.46835     | 0.7868  | 1.17789                |
|                                       | 15     | CAA     | 0       | 0          | 0.383711      | 1.98149          | 0      | 0      | 0           | 0       | 0                      |
|                                       | 16     | TAC     | 0       | 0          | 0.634804      | 2                | 0      | 0      | 0           | 0       | 0                      |
|                                       | 17     | CAG     | 0       | 0          | 0.426628      | 1.93857          | 0      | 0      | 0           | 0       | 0                      |
|                                       | 18     | ACC     | 0       | 1          | 1             | 2                | 0      | 0.5    | 0.5         | 0.6667  | 1.2575                 |

|    |    |     |   |   |          |         |        |        |         |        |          |
|----|----|-----|---|---|----------|---------|--------|--------|---------|--------|----------|
|    | 19 | CCT | 1 | 1 | 1        | 2       | 1      | 0.5    | -0.5    | 0.8889 | -1.2575  |
|    | 20 | TCC | 0 | 0 | 1        | 2       | 0      | 0      | 0       | 0      | 0        |
| 21 | 21 | ATT | 0 | 5 | 0.664156 | 2.33584 | 0      | 2.1406 | 2.14055 | 0.2862 | 5.38347  |
|    | 22 | CCC | 1 | 1 | 1        | 2       | 1      | 0.5    | -0.5    | 0.8889 | -1.2575  |
|    | 23 | GGT | 3 | 0 | 1        | 1.94333 | 3      | 0      | -3      | 1      | -7.54497 |
|    | 24 | TCC | 0 | 1 | 1        | 2       | 0      | 0.5    | 0.5     | 0.6667 | 1.2575   |
|    | 25 | TCC | 0 | 1 | 0.998295 | 2.0017  | 0      | 0.4996 | 0.49957 | 0.6672 | 1.25642  |
|    | 26 | GAC | 0 | 0 | 0.634804 | 2.3652  | 0      | 0      | 0       | 0      | 0        |
|    | 27 | TAC | 0 | 0 | 0.634804 | 2       | 0      | 0      | 0       | 0      | 0        |
|    | 28 | GCC | 0 | 0 | 1        | 2       | 0      | 0      | 0       | 0      | 0        |
|    | 29 | TGG | 0 | 0 | 0        | 2.14674 | 0      | 0      | 0       | 0      | 0        |
|    | 30 | CGA | 0 | 0 | 1.22056  | 1.14464 | 0      | 0      | 0       | 0      | 0        |
|    | 31 | ACA | 1 | 1 | 1        | 2       | 1      | 0.5    | -0.5    | 0.8889 | -1.2575  |
|    | 32 | TTT | 0 | 0 | 0.578713 | 2.42129 | 0      | 0      | 0       | 0      | 0        |
|    | 33 | GTG | 0 | 0 | 1        | 2       | 0      | 0      | 0       | 0      | 0        |
|    | 34 | TTC | 1 | 0 | 0.634543 | 2.36546 | 1.5759 | 0      | -1.5759 | 1      | -3.96347 |
|    | 35 | GTT | 0 | 1 | 1        | 2       | 0      | 0.5    | 0.5     | 0.6667 | 1.2575   |
|    | 36 | ACC | 2 | 1 | 1        | 1.97674 | 2      | 0.5059 | -1.4941 | 0.9621 | -3.75769 |
|    | 37 | TTC | 3 | 0 | 0.632698 | 2.3673  | 4.7416 | 0      | -4.7416 | 1      | -11.9251 |
|    | 38 | GGT | 2 | 0 | 1        | 2       | 2      | 0      | -2      | 1      | -5.02998 |
|    | 39 | TTG | 1 | 0 | 1.00124  | 1.77012 | 0.9988 | 0      | -0.9988 | 1      | -2.51187 |
|    | 40 | CTA | 6 | 0 | 1.43104  | 1.45055 | 4.1928 | 0      | -4.1928 | 1      | -10.5447 |
|    | 41 | ATA | 0 | 0 | 0.616289 | 2.38371 | 0      | 0      | 0       | 0      | 0        |
|    | 42 | GCC | 0 | 0 | 1        | 2       | 0      | 0      | 0       | 0      | 0        |
|    | 43 | GTA | 0 | 0 | 1        | 2       | 0      | 0      | 0       | 0      | 0        |

|    |    |     |   |   |           |         |        |        |         |        |           |
|----|----|-----|---|---|-----------|---------|--------|--------|---------|--------|-----------|
|    | 44 | GGC | 1 | 1 | 1.02009   | 1.97991 | 0.9803 | 0.5051 | -0.4752 | 0.8844 | -1.19521  |
|    | 45 | GTT | 2 | 2 | 0.992058  | 2.00794 | 2.016  | 0.996  | -1.02   | 0.8912 | -2.56521  |
|    | 46 | GCT | 2 | 3 | 1         | 2       | 2      | 1.5    | -0.5    | 0.7901 | -1.2575   |
|    | 47 | TGG | 0 | 1 | 0.0142343 | 2.14164 | 0      | 0.4669 | 0.46693 | 0.9934 | 1.17433   |
|    | 48 | CTT | 1 | 2 | 1.001     | 1.999   | 0.999  | 1.0005 | 0.0015  | 0.7403 | 0.0037602 |
|    | 49 | GCT | 2 | 0 | 1         | 2       | 2      | 0      | -2      | 1      | -5.02998  |
|    | 50 | TAC | 2 | 0 | 0.63428   | 2       | 3.1532 | 0      | -3.1532 | 1      | -7.93022  |
|    | 51 | ACT | 1 | 0 | 1         | 2       | 1      | 0      | -1      | 1      | -2.51499  |
|    | 52 | CTG | 1 | 0 | 1.63186   | 1.36717 | 0.6128 | 0      | -0.6128 | 1      | -1.54118  |
|    | 53 | TTT | 1 | 0 | 0.59264   | 2.40736 | 1.6874 | 0      | -1.6874 | 1      | -4.24371  |
|    | 54 | CTG | 3 | 0 | 1.38976   | 1.55853 | 2.1587 | 0      | -2.1587 | 1      | -5.42898  |
|    | 55 | AAA | 2 | 0 | 0.388012  | 2.30052 | 5.1545 | 0      | -5.1545 | 1      | -12.9635  |
|    | 56 | GAT | 0 | 0 | 0.578713  | 2.42129 | 0      | 0      | 0       | 0      | 0         |
|    | 57 | TTA | 1 | 2 | 0.916681  | 1.7044  | 1.0909 | 1.1734 | 0.08254 | 0.7186 | 0.20759   |
|    | 58 | ATT | 2 | 0 | 0.789556  | 2.21044 | 2.5331 | 0      | -2.5331 | 1      | -6.37065  |
|    | 59 | TTA | 1 | 0 | 0.962624  | 1.61708 | 1.0388 | 0      | -1.0388 | 1      | -2.61264  |
|    | 60 | GTG | 0 | 0 | 1         | 2       | 0      | 0      | 0       | 0      | 0         |
| 61 | 61 | TGT | 0 | 1 | 0.435029  | 2.19655 | 0      | 0.4553 | 0.45526 | 0.8347 | 1.14497   |
|    | 62 | AAG | 0 | 0 | 0.426628  | 2.2619  | 0      | 0      | 0       | 0      | 0         |
|    | 63 | GCG | 0 | 0 | 1         | 2       | 0      | 0      | 0       | 0      | 0         |
|    | 64 | AAG | 0 | 1 | 0.426628  | 2.26039 | 0      | 0.4424 | 0.4424  | 0.8412 | 1.11263   |
|    | 65 | AAG | 1 | 0 | 0.426429  | 2.2621  | 2.3451 | 0      | -2.3451 | 1      | -5.8978   |
|    | 66 | CAA | 1 | 0 | 0.394366  | 1.97083 | 2.5357 | 0      | -2.5357 | 1      | -6.37729  |
|    | 67 | AGG | 0 | 1 | 0.733962  | 2.26604 | 0      | 0.4413 | 0.4413  | 0.7553 | 1.10986   |
|    | 68 | AGG | 0 | 0 | 0.731447  | 2.26855 | 0      | 0      | 0       | 0      | 0         |



|    |    |     |     |     |          |         |        |        |         |        |            |
|----|----|-----|-----|-----|----------|---------|--------|--------|---------|--------|------------|
|    | 69 | ACC | 0   | 0   | 1        | 2       | 0      | 0      | 0       | 0      | 0          |
|    | 70 | GAG | 0   | 0   | 0.426628 | 2.21923 | 0      | 0      | 0       | 0      | 0          |
|    | 71 | GAA | 1   | 0   | 0.384111 | 2.26175 | 2.6034 | 0      | -2.6034 | 1      | -6.54757   |
|    | 72 | ATT | 0   | 0   | 0.787002 | 2.213   | 0      | 0      | 0       | 0      | 0          |
|    | 73 | GGT | 0   | 0   | 1        | 2       | 0      | 0      | 0       | 0      | 0          |
|    | 74 | TAC | 0   | 0   | 0.634804 | 2       | 0      | 0      | 0       | 0      | 0          |
|    | 75 | GGG | 1   | 2   | 0.993387 | 2.00331 | 1.0067 | 0.9983 | -0.0083 | 0.7432 | -0.0208939 |
|    | 76 | AAT | 0   | 0   | 0.578713 | 2.42129 | 0      | 0      | 0       | 0      | 0          |
|    | 77 | ACA | 0   | 0   | 1        | 2       | 0      | 0      | 0       | 0      | 0          |
|    | 78 | CCG | 0   | 0   | 1        | 2       | 0      | 0      | 0       | 0      | 0          |
|    | 79 | GCC | 0   | 0   | 1        | 2       | 0      | 0      | 0       | 0      | 0          |
|    | 80 | AGA | 0   | 0   | 0.68853  | 2       | 0      | 0      | 0       | 0      | 0          |
| 81 | 81 | TTA | 0.5 | 3.5 | 0.981356 | 1.70682 | 0.5095 | 2.0506 | 1.5411  | 0.3494 | 3.87586    |
|    | 82 | AAT | 0   | 0   | 0.578713 | 2.42129 | 0      | 0      | 0       | 0      | 0          |
|    | 83 | GGT | 0   | 0   | 1        | 2       | 0      | 0      | 0       | 0      | 0          |
|    | 84 | GAC | 0   | 0   | 0.634804 | 2.3652  | 0      | 0      | 0       | 0      | 0          |
|    | 85 | CAA | 0   | 0   | 0.383711 | 1.98149 | 0      | 0      | 0       | 0      | 0          |
|    | 86 | CAA | 0   | 0   | 0.383711 | 1.98149 | 0      | 0      | 0       | 0      | 0          |
|    | 87 | GGA | 0   | 0   | 1        | 1.64586 | 0      | 0      | 0       | 0      | 0          |
|    | 88 | CTC | 0   | 0   | 1        | 2       | 0      | 0      | 0       | 0      | 0          |
|    | 89 | CCG | 0   | 0   | 1        | 2       | 0      | 0      | 0       | 0      | 0          |
|    | 90 | AGG | 0   | 0   | 0.731447 | 2.26855 | 0      | 0      | 0       | 0      | 0          |

C.

| Coevolutionary sites of inter-protein of Rep and Rep A | Coevolutionary sites of inter-protein of CP and Rep | Coevolutionary sites of intra-protein | Codon# | Triplet | Syn (s) | Nonsyn (n) | Syn sites (S) | Nonsyn sites (N) | $d_S$  | $d_N$  | $d_N - d_S$ | P-value | Normalized $d_N - d_S$ |
|--------------------------------------------------------|-----------------------------------------------------|---------------------------------------|--------|---------|---------|------------|---------------|------------------|--------|--------|-------------|---------|------------------------|
|                                                        |                                                     |                                       | 1      | ATG     | 0       | 0          | 0             | 3                | 0      | 0      | 0           | 0       | 0                      |
| 2                                                      | 2                                                   | 2                                     | 2      | GCC     | 1       | 3          | 1             | 2                | 1      | 1.5    | 0.5         | 0.5926  | 1.08432                |
|                                                        |                                                     |                                       | 3      | TCT     | 0       | 1          | 0.997889      | 2.00211          | 0      | 0.4995 | 0.49947     | 0.6674  | 1.08317                |
|                                                        |                                                     |                                       | 4      | TCA     | 0       | 0          | 1             | 1.58458          | 0      | 0      | 0           | 0       | 0                      |
|                                                        |                                                     |                                       | 5      | TCT     | 0       | 1          | 0.997889      | 2.00211          | 0      | 0.4995 | 0.49947     | 0.6674  | 1.08317                |
| 6                                                      | 6                                                   | 6                                     | 6      | ACA     | 1       | 5          | 1             | 1.99871          | 1      | 2.5016 | 1.50161     | 0.3509  | 3.25645                |
|                                                        |                                                     |                                       | 7      | CCC     | 0       | 1          | 0.997848      | 2.00215          | 0      | 0.4995 | 0.49946     | 0.6674  | 1.08315                |
|                                                        |                                                     |                                       | 8      | AGG     | 0       | 1          | 0.914437      | 2.08556          | 0      | 0.4795 | 0.47949     | 0.6952  | 1.03983                |
|                                                        |                                                     |                                       | 9      | TTC     | 0       | 0          | 0.584579      | 2.41542          | 0      | 0      | 0           | 0       | 0                      |
|                                                        |                                                     |                                       | 10     | CGA     | 7       | 0          | 1.06058       | 1.80502          | 6.6002 | 0      | -6.6002     | 1       | -14.3133               |
|                                                        |                                                     |                                       | 11     | GTC     | 2       | 0          | 1             | 2                | 2      | 0      | -2          | 1       | -4.33726               |
|                                                        |                                                     |                                       | 12     | TAT     | 0       | 0          | 0.592643      | 2                | 0      | 0      | 0           | 0       | 0                      |
|                                                        |                                                     |                                       | 13     | TCC     | 2       | 0          | 1             | 1.90089          | 2      | 0      | -2          | 1       | -4.33726               |
|                                                        |                                                     |                                       | 14     | AAG     | 1       | 0          | 0.624746      | 2.11226          | 1.6007 | 0      | -1.6007     | 1       | -3.47122               |
|                                                        |                                                     |                                       | 15     | TAC     | 0       | 1          | 0.584579      | 2.00086          | 0      | 0.4998 | 0.49979     | 0.7739  | 1.08385                |
|                                                        |                                                     |                                       | 16     | CTC     | 1       | 1          | 1.00121       | 1.99879          | 0.9988 | 0.5003 | -0.4985     | 0.8886  | -1.08104               |
|                                                        |                                                     |                                       | 17     | TTT     | 1       | 0          | 0.590724      | 2.40928          | 1.6928 | 0      | -1.6928     | 1       | -3.67114               |

|    |    |    |    |     |     |     |          |         |        |        |         |        |           |
|----|----|----|----|-----|-----|-----|----------|---------|--------|--------|---------|--------|-----------|
|    |    |    | 18 | CTA | 0   | 1   | 1.58276  | 1.41724 | 0      | 0.7056 | 0.7056  | 0.4724 | 1.53018   |
|    |    |    | 19 | ACA | 0   | 0   | 1        | 2       | 0      | 0      | 0       | 0      | 0         |
|    |    |    | 20 | TAT | 0   | 0   | 0.592643 | 2       | 0      | 0      | 0       | 0      | 0         |
|    |    |    | 21 | CCT | 0   | 0   | 1        | 2       | 0      | 0      | 0       | 0      | 0         |
|    |    |    | 22 | CAA | 0   | 1   | 0.488808 | 1.92934 | 0      | 0.5183 | 0.51831 | 0.7979 | 1.12403   |
|    |    |    | 23 | TGT | 1   | 0   | 0.590724 | 2.12459 | 1.6928 | 0      | -1.6928 | 1      | -3.67114  |
| 24 | 24 | 24 | 24 | ACC | 0   | 2   | 0.962558 | 2.03744 | 0      | 0.9816 | 0.98162 | 0.4612 | 2.12878   |
|    |    |    | 25 | CTT | 0   | 0   | 1        | 2       | 0      | 0      | 0       | 0      | 0         |
|    |    |    | 26 | GAG | 1   | 2   | 0.624746 | 2.23043 | 1.6007 | 0.8967 | -0.704  | 0.8773 | -1.52663  |
|    |    |    | 27 | CCA | 1   | 1   | 1.00547  | 1.99453 | 0.9946 | 0.5014 | -0.4932 | 0.8877 | -1.06955  |
|    |    |    | 28 | CAG | 0   | 2   | 0.666158 | 1.75396 | 0      | 1.1403 | 1.14028 | 0.5253 | 2.47284   |
| 29 | 29 | 29 | 29 | TAC | 1   | 3   | 0.588489 | 2.10012 | 1.6993 | 1.4285 | -0.2708 | 0.7896 | -0.587221 |
| 30 |    | 30 | 30 | GCC | 0   | 3   | 1.25578  | 1.4558  | 0      | 2.0607 | 2.06072 | 0.1548 | 4.46894   |
| 31 |    | 31 | 31 | TTG | 0   | 2   | 0.600211 | 2.38527 | 0      | 0.8385 | 0.83848 | 0.6383 | 1.81835   |
| 32 | 32 | 32 | 32 | GAT | 1   | 1   | 1        | 1.62761 | 1      | 0.6144 | -0.3856 | 0.8552 | -0.83623  |
|    |    |    | 33 | TCA | 1   | 2   | 1.00512  | 1.99488 | 0.9949 | 1.0026 | 0.00766 | 0.7385 | 0.0166049 |
|    |    |    | 34 | CTT | 1   | 1   | 0.99905  | 1.99931 | 1.001  | 0.5002 | -0.5008 | 0.889  | -1.086    |
|    |    |    | 35 | CGC | 0.5 | 1.5 | 0.996276 | 2.0019  | 0.5019 | 0.7493 | 0.24742 | 0.6677 | 0.536563  |
|    |    |    | 36 | ACT | 0   | 1   | 1        | 2       | 0      | 0.5    | 0.5     | 0.6667 | 1.08432   |
|    |    |    | 37 | CTC | 1.5 | 2.5 | 1.25541  | 1.45517 | 1.1948 | 1.718  | 0.52319 | 0.5552 | 1.1346    |
|    |    |    | 38 | TTG | 0   | 3   | 0.683419 | 2.31658 | 0      | 1.295  | 1.29501 | 0.4604 | 2.8084    |
| 39 | 39 | 39 | 39 | AAC | 0   | 3   | 0.49413  | 2.24677 | 0      | 1.3353 | 1.33525 | 0.5508 | 2.89566   |
|    |    |    | 40 | AAA | 0   | 1   | 0.592643 | 2.00121 | 0      | 0.4997 | 0.4997  | 0.7715 | 1.08366   |
|    |    |    | 41 | TAT | 0   | 0   | 0.667188 | 2.18982 | 0      | 0      | 0       | 0      | 0         |
|    |    |    | 42 | GAG | 2   | 0   | 1        | 2       | 2      | 0      | -2      | 1      | -4.33726  |

|    |    |    |    |     |   |   |          |         |        |        |         |        |          |
|----|----|----|----|-----|---|---|----------|---------|--------|--------|---------|--------|----------|
|    |    |    | 43 | CCC | 2 | 1 | 1.00121  | 1.99879 | 1.9976 | 0.5003 | -1.4973 | 0.9628 | -3.24705 |
|    |    |    | 44 | CTC | 0 | 0 | 0.584579 | 2       | 0      | 0      | 0       | 0      | 0        |
|    |    |    | 45 | TAC | 0 | 0 | 0.848056 | 2.15194 | 0      | 0      | 0       | 0      | 0        |
|    |    |    | 46 | ATC | 1 | 0 | 1        | 2       | 1      | 0      | -1      | 1      | -2.16863 |
|    |    |    | 47 | GCT | 1 | 4 | 1        | 2       | 1      | 2      | 1       | 0.4609 | 2.16863  |
| 48 | 48 | 48 | 48 | GCT | 0 | 0 | 1        | 2       | 0      | 0      | 0       | 0      | 0        |
|    |    |    | 49 | GTT | 0 | 0 | 0.737004 | 2       | 0      | 0      | 0       | 0      | 0        |
|    |    |    | 50 | AGA | 0 | 0 | 0.667188 | 2.18982 | 0      | 0      | 0       | 0      | 0        |
|    |    |    | 51 | GAG | 1 | 0 | 1        | 2       | 1      | 0      | -1      | 1      | -2.16863 |
|    |    |    | 52 | CTC | 0 | 0 | 0.584579 | 2.41542 | 0      | 0      | 0       | 0      | 0        |
|    |    |    | 53 | CAC | 0 | 0 | 0.488808 | 2.3682  | 0      | 0      | 0       | 0      | 0        |
|    |    |    | 54 | GAA | 0 | 1 | 0.592643 | 2.40736 | 0      | 0.4154 | 0.41539 | 0.8025 | 0.900834 |
|    |    |    | 55 | GAT | 0 | 0 | 1        | 1.857   | 0      | 0      | 0       | 0      | 0        |
|    |    |    | 56 | GGA | 0 | 0 | 1        | 1.58458 | 0      | 0      | 0       | 0      | 0        |
|    |    |    | 57 | TCA | 0 | 0 | 1        | 2       | 0      | 0      | 0       | 0      | 0        |
|    |    |    | 58 | CCA | 0 | 0 | 0.592643 | 2.40736 | 0      | 0      | 0       | 0      | 0        |
|    |    |    | 59 | CAT | 3 | 0 | 1.57685  | 1.41893 | 1.9025 | 0      | -1.9025 | 1      | -4.12587 |
|    |    |    | 60 | CTG | 0 | 0 | 0.584579 | 2.41542 | 0      | 0      | 0       | 0      | 0        |
|    |    |    | 61 | CAC | 1 | 1 | 0.99976  | 2.00024 | 1.0002 | 0.4999 | -0.5003 | 0.8889 | -1.08497 |
|    |    |    | 62 | GTT | 0 | 0 | 1        | 2       | 0      | 0      | 0       | 0      | 0        |
|    |    |    | 63 | CTC | 0 | 0 | 1        | 2       | 0      | 0      | 0       | 0      | 0        |
|    |    |    | 64 | GTG | 3 | 0 | 0.64871  | 1.76671 | 4.6246 | 0      | -4.6246 | 1      | -10.029  |
|    |    |    | 65 | CAG | 0 | 0 | 0.584579 | 2.41542 | 0      | 0      | 0       | 0      | 0        |
|    |    |    | 66 | AAC | 0 | 1 | 0.668991 | 2.06992 | 0      | 0.4831 | 0.48311 | 0.7557 | 1.04769  |
|    |    |    | 67 | AAG | 0 | 0 | 1        | 2       | 0      | 0      | 0       | 0      | 0        |

|  |  |  |    |     |   |   |          |         |        |        |         |        |           |
|--|--|--|----|-----|---|---|----------|---------|--------|--------|---------|--------|-----------|
|  |  |  | 68 | CTT | 0 | 0 | 1        | 2       | 0      | 0      | 0       | 0      | 0         |
|  |  |  | 69 | CGT | 0 | 0 | 1        | 2       | 0      | 0      | 0       | 0      | 0         |
|  |  |  | 70 | GCT | 4 | 0 | 1        | 1.91479 | 4      | 0      | -4      | 1      | -8.67452  |
|  |  |  | 71 | TCC | 0 | 0 | 0.848056 | 2.15194 | 0      | 0      | 0       | 0      | 0         |
|  |  |  | 72 | ATC | 0 | 0 | 1        | 2       | 0      | 0      | 0       | 0      | 0         |
|  |  |  | 73 | ACC | 0 | 0 | 0.592643 | 2.40736 | 0      | 0      | 0       | 0      | 0         |
|  |  |  | 74 | AAT | 1 | 0 | 1        | 2       | 1      | 0      | -1      | 1      | -2.16863  |
|  |  |  | 75 | CCC | 0 | 2 | 0.592643 | 2.40736 | 0      | 0.8308 | 0.83079 | 0.6439 | 1.80167   |
|  |  |  | 76 | AAT | 3 | 0 | 1        | 2       | 3      | 0      | -3      | 1      | -6.50589  |
|  |  |  | 77 | GCC | 2 | 1 | 1.04647  | 1.72808 | 1.9112 | 0.5787 | -1.3325 | 0.9463 | -2.88972  |
|  |  |  | 78 | TTA | 0 | 1 | 0.584579 | 2.4124  | 0      | 0.4145 | 0.41453 | 0.8049 | 0.89895   |
|  |  |  | 79 | AAC | 3 | 0 | 1.0006   | 1.9994  | 2.9982 | 0      | -2.9982 | 1      | -6.50196  |
|  |  |  | 80 | CTC | 0 | 0 | 1        | 2       | 0      | 0      | 0       | 0      | 0         |
|  |  |  | 81 | CGT | 0 | 0 | 0        | 3       | 0      | 0      | 0       | 0      | 0         |
|  |  |  | 82 | ATG | 1 | 0 | 0.590724 | 2.40928 | 1.6928 | 0      | -1.6928 | 1      | -3.67114  |
|  |  |  | 83 | GAT | 0 | 0 | 1        | 2       | 0      | 0      | 0       | 0      | 0         |
|  |  |  | 84 | ACA | 1 | 0 | 1        | 2       | 1      | 0      | -1      | 1      | -2.16863  |
|  |  |  | 85 | TCT | 0 | 0 | 1        | 2       | 0      | 0      | 0       | 0      | 0         |
|  |  |  | 86 | CCA | 3 | 1 | 0.588864 | 2.40945 | 5.0946 | 0.415  | -4.6795 | 0.9985 | -10.1482  |
|  |  |  | 87 | TTC | 1 | 2 | 0.958646 | 2.02757 | 1.0431 | 0.9864 | -0.0567 | 0.757  | -0.123039 |
|  |  |  | 88 | TCC | 2 | 0 | 0.600268 | 2.39973 | 3.3318 | 0      | -3.3318 | 1      | -7.22554  |
|  |  |  | 89 | ATA | 1 | 0 | 0.584739 | 2.41526 | 1.7102 | 0      | -1.7102 | 1      | -3.70871  |
|  |  |  | 90 | TTC | 1 | 0 | 0.590724 | 2.40928 | 1.6928 | 0      | -1.6928 | 1      | -3.67114  |
|  |  |  | 91 | CAT | 1 | 0 | 1        | 2       | 1      | 0      | -1      | 1      | -2.16863  |
|  |  |  | 92 | CCT | 0 | 1 | 0.592643 | 2.4044  | 0      | 0.4159 | 0.41591 | 0.8023 | 0.901943  |

|     |     |     |     |     |   |   |          |         |        |        |         |        |          |
|-----|-----|-----|-----|-----|---|---|----------|---------|--------|--------|---------|--------|----------|
|     |     |     | 93  | AAT | 1 | 2 | 0.590767 | 2.40869 | 1.6927 | 0.8303 | -0.8624 | 0.8989 | -1.8702  |
| 94  |     | 94  | 94  | ATA | 1 | 0 | 0.53125  | 1.88417 | 1.8824 | 0      | -1.8824 | 1      | -4.08213 |
|     |     |     | 95  | CAA | 1 | 0 | 1        | 2       | 1      | 0      | -1      | 1      | -2.16863 |
|     |     |     | 96  | GCT | 0 | 0 | 1        | 2       | 0      | 0      | 0       | 0      | 0        |
|     |     |     | 97  | GCC | 0 | 0 | 0.488808 | 2.2482  | 0      | 0      | 0       | 0      | 0        |
|     |     |     | 98  | AAA | 3 | 1 | 0.587441 | 2.41256 | 5.1069 | 0.4145 | -4.6924 | 0.9985 | -10.1761 |
|     |     |     | 99  | GAC | 0 | 1 | 0.587168 | 2.151   | 0      | 0.4649 | 0.4649  | 0.7856 | 1.0082   |
|     |     |     | 100 | TGC | 1 | 1 | 0.584788 | 2.41521 | 1.71   | 0.414  | -1.296  | 0.962  | -2.8105  |
|     |     |     | 101 | AAC | 1 | 1 | 0.496227 | 1.92344 | 2.0152 | 0.5199 | -1.4953 | 0.9579 | -3.24276 |
|     |     |     | 102 | CAA | 1 | 0 | 1        | 2       | 1      | 0      | -1      | 1      | -2.16863 |
|     |     |     | 103 | GTT | 0 | 0 | 1        | 2       | 0      | 0      | 0       | 0      | 0        |
|     |     |     | 104 | CGT | 0 | 0 | 0.592643 | 2.40736 | 0      | 0      | 0       | 0      | 0        |
|     |     |     | 105 | GAT | 2 | 0 | 0.584733 | 2       | 3.4204 | 0      | -3.4204 | 1      | -7.4175  |
|     |     |     | 106 | TAC | 0 | 1 | 0.848528 | 2.15147 | 0      | 0.4648 | 0.4648  | 0.7172 | 1.00798  |
|     |     |     | 107 | ATC | 0 | 1 | 1        | 2       | 0      | 0.5    | 0.5     | 0.6667 | 1.08432  |
|     |     |     | 108 | ACG | 3 | 1 | 0.643128 | 2.09442 | 4.6647 | 0.4775 | -4.1872 | 0.997  | -9.08058 |
|     |     |     | 109 | AAG | 1 | 0 | 0.666081 | 2.19092 | 1.5013 | 0      | -1.5013 | 1      | -3.25581 |
|     |     |     | 110 | GAG | 0 | 0 | 1        | 2       | 0      | 0      | 0       | 0      | 0        |
|     |     |     | 111 | GTT | 0 | 0 | 0.584579 | 2.41542 | 0      | 0      | 0       | 0      | 0        |
|     |     |     | 112 | GAC | 0 | 0 | 1        | 2       | 0      | 0      | 0       | 0      | 0        |
|     |     |     | 113 | TCC | 0 | 0 | 0.592643 | 2.40736 | 0      | 0      | 0       | 0      | 0        |
|     |     |     | 114 | GAT | 1 | 6 | 1.0006   | 1.9994  | 0.9994 | 3.0009 | 2.00151 | 0.263  | 4.34054  |
| 115 | 115 | 115 | 115 | GTA | 0 | 0 | 0.584579 | 2.41542 | 0      | 0      | 0       | 0      | 0        |
|     |     |     | 116 | AAC | 1 | 0 | 1        | 2       | 1      | 0      | -1      | 1      | -2.16863 |
|     |     |     | 117 | ACA | 0 | 0 | 1        | 2       | 0      | 0      | 0       | 0      | 0        |

|  |  |  |     |     |     |     |          |         |        |        |         |        |           |
|--|--|--|-----|-----|-----|-----|----------|---------|--------|--------|---------|--------|-----------|
|  |  |  | 118 | GCT | 1   | 0   | 0.665895 | 2.19111 | 1.5017 | 0      | -1.5017 | 1      | -3.25671  |
|  |  |  | 119 | GAG | 0   | 0   | 0        | 1.66562 | 0      | 0      | 0       | 0      | 0         |
|  |  |  | 120 | TGG | 0   | 0   | 1        | 1.857   | 0      | 0      | 0       | 0      | 0         |
|  |  |  | 121 | GGA | 0   | 0   | 1        | 2       | 0      | 0      | 0       | 0      | 0         |
|  |  |  | 122 | ACA | 0   | 0   | 0.584579 | 2.41542 | 0      | 0      | 0       | 0      | 0         |
|  |  |  | 123 | TTC | 1.5 | 1.5 | 0.933078 | 2.06692 | 1.6076 | 0.7257 | -0.8819 | 0.8699 | -1.91244  |
|  |  |  | 124 | GTG | 4   | 1   | 1        | 2       | 4      | 0.5    | -3.5    | 0.9959 | -7.59021  |
|  |  |  | 125 | GCT | 0   | 1   | 1        | 2       | 0      | 0.5    | 0.5     | 0.6667 | 1.08432   |
|  |  |  | 126 | GTT | 1   | 1   | 1        | 1.64081 | 1      | 0.6095 | -0.3905 | 0.8566 | -0.846947 |
|  |  |  | 127 | TCA | 1   | 0   | 1        | 2       | 1      | 0      | -1      | 1      | -2.16863  |
|  |  |  | 128 | ACT | 1   | 1   | 1        | 2       | 1      | 0.5    | -0.5    | 0.8889 | -1.08432  |
|  |  |  | 129 | CCA | 0   | 0   | 1        | 2       | 0      | 0      | 0       | 0      | 0         |
|  |  |  | 130 | GGT | 0   | 0   | 1        | 2       | 0      | 0      | 0       | 0      | 0         |
|  |  |  | 131 | CGT | 1   | 0   | 0.489177 | 2.24783 | 2.0443 | 0      | -2.0443 | 1      | -4.43322  |
|  |  |  | 132 | AAA | 0   | 1   | 0.58587  | 2.41413 | 0      | 0.4142 | 0.41423 | 0.8047 | 0.898307  |
|  |  |  | 133 | GAC | 0   | 0   | 1        | 2       | 0      | 0      | 0       | 0      | 0         |
|  |  |  | 134 | CGT | 4   | 0   | 0.591559 | 2.40844 | 6.7618 | 0      | -6.7618 | 1      | -14.6638  |
|  |  |  | 135 | GAT | 2   | 0   | 1        | 2       | 2      | 0      | -2      | 1      | -4.33726  |
|  |  |  | 136 | GCG | 0   | 0   | 0.592643 | 2.40736 | 0      | 0      | 0       | 0      | 0         |
|  |  |  | 137 | GAT | 0   | 0   | 0        | 3       | 0      | 0      | 0       | 0      | 0         |
|  |  |  | 138 | ATG | 0   | 0   | 0.488808 | 2.2482  | 0      | 0      | 0       | 0      | 0         |
|  |  |  | 139 | AAA | 1   | 0   | 0.657406 | 1.75802 | 1.5211 | 0      | -1.5211 | 1      | -3.29877  |
|  |  |  | 140 | CAG | 0   | 0   | 0.848056 | 2.15194 | 0      | 0      | 0       | 0      | 0         |
|  |  |  | 141 | ATC | 1   | 0   | 0.880311 | 2.11969 | 1.136  | 0      | -1.136  | 1      | -2.46348  |
|  |  |  | 142 | ATT | 1   | 0   | 0.506917 | 2.35009 | 1.9727 | 0      | -1.9727 | 1      | -4.27808  |

|     |     |     |     |     |   |   |          |         |        |        |         |        |          |
|-----|-----|-----|-----|-----|---|---|----------|---------|--------|--------|---------|--------|----------|
|     |     |     | 143 | GAA | 5 | 0 | 1        | 1.95697 | 5      | 0      | -5      | 1      | -10.8432 |
|     |     |     | 144 | TCT | 0 | 2 | 0.612062 | 2.38523 | 0      | 0.8385 | 0.8385  | 0.6333 | 1.81839  |
|     |     |     | 145 | AGT | 0 | 0 | 1        | 2       | 0      | 0      | 0       | 0      | 0        |
|     |     |     | 146 | TCC | 1 | 0 | 1        | 2       | 1      | 0      | -1      | 1      | -2.16863 |
|     |     |     | 147 | TCT | 4 | 0 | 1.00027  | 1.99973 | 3.9989 | 0      | -3.9989 | 1      | -8.67216 |
|     |     |     | 148 | CGC | 1 | 1 | 0.666634 | 2.18798 | 1.5001 | 0.457  | -1.043  | 0.9455 | -2.26195 |
|     |     |     | 149 | GAG | 0 | 0 | 0.488808 | 2.3682  | 0      | 0      | 0       | 0      | 0        |
|     |     |     | 150 | GAA | 2 | 0 | 0.585423 | 2.41458 | 3.4163 | 0      | -3.4163 | 1      | -7.40877 |
|     |     |     | 151 | TTC | 0 | 0 | 1        | 2       | 0      | 0      | 0       | 0      | 0        |
|     |     |     | 152 | CTC | 1 | 0 | 0.584621 | 2.41538 | 1.7105 | 0      | -1.7105 | 1      | -3.70946 |
|     |     |     | 153 | AGC | 0 | 0 | 0        | 3       | 0      | 0      | 0       | 0      | 0        |
|     |     |     | 154 | ATG | 1 | 0 | 1        | 2       | 1      | 0      | -1      | 1      | -2.16863 |
|     |     |     | 155 | GTT | 0 | 0 | 0.584579 | 2.15194 | 0      | 0      | 0       | 0      | 0        |
|     |     |     | 156 | TGC | 0 | 3 | 0.592643 | 2.40736 | 0      | 1.2462 | 1.24618 | 0.5167 | 2.7025   |
| 157 | 157 | 157 | 157 | AAT | 1 | 0 | 1.00055  | 1.99825 | 0.9995 | 0      | -0.9995 | 1      | -2.16745 |
|     |     |     | 158 | CGT | 1 | 1 | 0.595157 | 2.40484 | 1.6802 | 0.4158 | -1.2644 | 0.9606 | -2.74202 |
|     |     |     | 159 | TTT | 1 | 0 | 1        | 2       | 1      | 0      | -1      | 1      | -2.16863 |
|     |     |     | 160 | CCG | 0 | 0 | 0.592643 | 2.40736 | 0      | 0      | 0       | 0      | 0        |
|     |     |     | 161 | TTT | 0 | 0 | 0.488808 | 2.3682  | 0      | 0      | 0       | 0      | 0        |
|     |     |     | 162 | GAA | 0 | 0 | 0        | 1.66562 | 0      | 0      | 0       | 0      | 0        |
|     |     |     | 163 | TGG | 3 | 0 | 1        | 1.94118 | 3      | 0      | -3      | 1      | -6.50589 |
|     |     |     | 164 | TCT | 4 | 0 | 0.766646 | 2.23335 | 5.2175 | 0      | -5.2175 | 1      | -11.3149 |
|     |     |     | 165 | ATC | 0 | 0 | 1        | 2       | 0      | 0      | 0       | 0      | 0        |
|     |     |     | 166 | CGT | 4 | 0 | 1.01334  | 1.98666 | 3.9473 | 0      | -3.9473 | 1      | -8.5603  |
|     |     |     | 167 | CTC | 0 | 0 | 0.488808 | 2.2482  | 0      | 0      | 0       | 0      | 0        |



|  |  |  |     |     |   |   |          |         |        |        |         |        |          |
|--|--|--|-----|-----|---|---|----------|---------|--------|--------|---------|--------|----------|
|  |  |  | 168 | AAA | 0 | 1 | 0.586729 | 2.41327 | 0      | 0.4144 | 0.41438 | 0.8044 | 0.898627 |
|  |  |  | 169 | GAC | 0 | 0 | 0.584579 | 2.41542 | 0      | 0      | 0       | 0      | 0        |
|  |  |  | 170 | TTC | 1 | 0 | 0.649079 | 2.20792 | 1.5406 | 0      | -1.5406 | 1      | -3.34109 |
|  |  |  | 171 | GAG | 0 | 0 | 0.584579 | 2       | 0      | 0      | 0       | 0      | 0        |
|  |  |  | 172 | TAC | 1 | 1 | 0.997926 | 2.00044 | 1.0021 | 0.4999 | -0.5022 | 0.8892 | -1.08906 |
|  |  |  | 173 | ACG | 0 | 0 | 1        | 2       | 0      | 0      | 0       | 0      | 0        |
|  |  |  | 174 | GCA | 1 | 0 | 1.02675  | 1.91391 | 0.9739 | 0      | -0.9739 | 1      | -2.11214 |
|  |  |  | 175 | CGC | 0 | 0 | 0.592643 | 2.40736 | 0      | 0      | 0       | 0      | 0        |
|  |  |  | 176 | CAT | 0 | 0 | 1.58458  | 1.41542 | 0      | 0      | 0       | 0      | 0        |
|  |  |  | 177 | CTA | 1 | 0 | 0.591824 | 2.40818 | 1.6897 | 0      | -1.6897 | 1      | -3.66432 |
|  |  |  | 178 | TTT | 1 | 0 | 1        | 2       | 1      | 0      | -1      | 1      | -2.16863 |
|  |  |  | 179 | CCT | 0 | 0 | 0.584579 | 2.41542 | 0      | 0      | 0       | 0      | 0        |
|  |  |  | 180 | GAC | 0 | 1 | 0.998413 | 1.99977 | 0      | 0.5001 | 0.50006 | 0.667  | 1.08444  |
|  |  |  | 181 | CCA | 0 | 0 | 1        | 2       | 0      | 0      | 0       | 0      | 0        |
|  |  |  | 182 | GTT | 3 | 1 | 1        | 2       | 3      | 0.5    | -2.5    | 0.9877 | -5.42158 |
|  |  |  | 183 | GCC | 0 | 0 | 1        | 2       | 0      | 0      | 0       | 0      | 0        |
|  |  |  | 184 | ACT | 0 | 0 | 0.584579 | 2       | 0      | 0      | 0       | 0      | 0        |
|  |  |  | 185 | TAC | 0 | 1 | 1        | 2       | 0      | 0.5    | 0.5     | 0.6667 | 1.08432  |
|  |  |  | 186 | ACA | 2 | 1 | 1        | 2       | 2      | 0.5    | -1.5    | 0.963  | -3.25295 |
|  |  |  | 187 | CCT | 0 | 0 | 0.667188 | 2.18982 | 0      | 0      | 0       | 0      | 0        |
|  |  |  | 188 | GAG | 1 | 0 | 0.591824 | 2.40818 | 1.6897 | 0      | -1.6897 | 1      | -3.66432 |
|  |  |  | 189 | TTT | 2 | 0 | 1        | 2       | 2      | 0      | -2      | 1      | -4.33726 |
|  |  |  | 190 | CCA | 0 | 1 | 0.984575 | 2.01543 | 0      | 0.4962 | 0.49617 | 0.6718 | 1.07602  |
|  |  |  | 191 | ACC | 0 | 2 | 0.489643 | 2.36855 | 0      | 0.8444 | 0.8444  | 0.6867 | 1.83119  |
|  |  |  | 192 | GAA | 2 | 0 | 1        | 1.62835 | 2      | 0      | -2      | 1      | -4.33726 |

|  |  |  |     |     |   |   |          |         |        |        |         |        |          |
|--|--|--|-----|-----|---|---|----------|---------|--------|--------|---------|--------|----------|
|  |  |  | 193 | TCA | 0 | 0 | 1        | 2       | 0      | 0      | 0       | 0      | 0        |
|  |  |  | 194 | CTC | 6 | 1 | 0.756755 | 2.24325 | 7.9286 | 0.4458 | -7.4828 | 0.9999 | -16.2274 |
|  |  |  | 195 | ATT | 5 | 0 | 0.585707 | 2.14692 | 8.5367 | 0      | -8.5367 | 1      | -18.5129 |
|  |  |  | 196 | TGC | 1 | 0 | 0.592593 | 2.40741 | 1.6875 | 0      | -1.6875 | 1      | -3.65956 |
|  |  |  | 197 | CAT | 3 | 0 | 0.660961 | 2.19604 | 4.5389 | 0      | -4.5389 | 1      | -9.84308 |
|  |  |  | 198 | GAG | 0 | 0 | 1        | 2       | 0      | 0      | 0       | 0      | 0        |
|  |  |  | 199 | ACC | 0 | 0 | 0.883956 | 2.11604 | 0      | 0      | 0       | 0      | 0        |
|  |  |  | 200 | ATT | 0 | 0 | 0.488808 | 2.3682  | 0      | 0      | 0       | 0      | 0        |
|  |  |  | 201 | GAA | 0 | 0 | 0.584579 | 2.41542 | 0      | 0      | 0       | 0      | 0        |
|  |  |  | 202 | AGC | 0 | 0 | 0        | 1.66562 | 0      | 0      | 0       | 0      | 0        |
|  |  |  | 203 | TGG | 0 | 0 | 0.488808 | 2.2482  | 0      | 0      | 0       | 0      | 0        |
|  |  |  | 204 | AAA | 0 | 0 | 0.592643 | 2.40736 | 0      | 0      | 0       | 0      | 0        |
|  |  |  | 205 | AAT | 0 | 0 | 0.488808 | 2.3682  | 0      | 0      | 0       | 0      | 0        |
|  |  |  | 206 | GAA | 1 | 0 | 0.591824 | 2.40818 | 1.6897 | 0      | -1.6897 | 1      | -3.66432 |
|  |  |  | 207 | CAT | 2 | 0 | 1.26781  | 1.73219 | 1.5775 | 0      | -1.5775 | 1      | -3.42106 |
|  |  |  | 208 | CTA | 0 | 0 | 0.584579 | 2       | 0      | 0      | 0       | 0      | 0        |
|  |  |  | 209 | TAC | 5 | 0 | 1        | 1.99945 | 5      | 0      | -5      | 1      | -10.8432 |
|  |  |  | 210 | TCT | 0 | 0 | 0.667188 | 2.18982 | 0      | 0      | 0       | 0      | 0        |
|  |  |  | 211 | GAG | 0 | 0 | 1        | 1.58458 | 0      | 0      | 0       | 0      | 0        |
|  |  |  | 212 | TCA | 4 | 0 | 1        | 2       | 4      | 0      | -4      | 1      | -8.67452 |
|  |  |  | 213 | CCG | 1 | 0 | 1        | 1.98548 | 1      | 0      | -1      | 1      | -2.16863 |
|  |  |  | 214 | GGG | 1 | 0 | 0.950722 | 2.04928 | 1.0518 | 0      | -1.0518 | 1      | -2.28104 |
|  |  |  | 215 | AGG | 0 | 0 | 0.592643 | 2.40736 | 0      | 0      | 0       | 0      | 0        |
|  |  |  | 216 | CAT | 4 | 0 | 0.641749 | 2.09525 | 6.233  | 0      | -6.233  | 1      | -13.517  |
|  |  |  | 217 | AAG | 0 | 0 | 1        | 2       | 0      | 0      | 0       | 0      | 0        |

|  |  |  |     |     |     |     |          |         |        |        |         |        |           |
|--|--|--|-----|-----|-----|-----|----------|---------|--------|--------|---------|--------|-----------|
|  |  |  | 218 | TCC | 0.5 | 1.5 | 0.843537 | 2.12889 | 0.5927 | 0.7046 | 0.11185 | 0.7162 | 0.242559  |
|  |  |  | 219 | ATC | 0   | 0   | 0.584579 | 2       | 0      | 0      | 0       | 0      | 0         |
|  |  |  | 220 | TAC | 0   | 2   | 0.848528 | 2.15147 | 0      | 0.9296 | 0.9296  | 0.5143 | 2.01595   |
|  |  |  | 221 | ATC | 0   | 0   | 0.584579 | 2.15194 | 0      | 0      | 0       | 0      | 0         |
|  |  |  | 222 | TGC | 2   | 0   | 1        | 1.98439 | 2      | 0      | -2      | 1      | -4.33726  |
|  |  |  | 223 | GGG | 0   | 0   | 1        | 2       | 0      | 0      | 0       | 0      | 0         |
|  |  |  | 224 | CCA | 4   | 0   | 1        | 2       | 4      | 0      | -4      | 1      | -8.67452  |
|  |  |  | 225 | ACC | 0   | 0   | 0.737004 | 2       | 0      | 0      | 0       | 0      | 0         |
|  |  |  | 226 | AGA | 1   | 0   | 1        | 2       | 1      | 0      | -1      | 1      | -2.16863  |
|  |  |  | 227 | ACA | 1   | 1   | 0.99864  | 1.85819 | 1.0014 | 0.5382 | -0.4632 | 0.8778 | -1.00452  |
|  |  |  | 228 | GGA | 0   | 0   | 0.667188 | 2.06982 | 0      | 0      | 0       | 0      | 0         |
|  |  |  | 229 | AAG | 0   | 0   | 1        | 2       | 0      | 0      | 0       | 0      | 0         |
|  |  |  | 230 | ACT | 0   | 0   | 1        | 2       | 0      | 0      | 0       | 0      | 0         |
|  |  |  | 231 | TCC | 0   | 0   | 0        | 1.66562 | 0      | 0      | 0       | 0      | 0         |
|  |  |  | 232 | TGG | 0   | 0   | 1        | 2       | 0      | 0      | 0       | 0      | 0         |
|  |  |  | 233 | GCA | 1   | 0   | 0.917548 | 2.08245 | 1.0899 | 0      | -1.0899 | 1      | -2.36351  |
|  |  |  | 234 | AGG | 1   | 0   | 1        | 2       | 1      | 0      | -1      | 1      | -2.16863  |
|  |  |  | 235 | TCT | 0   | 0   | 1.58458  | 1.41542 | 0      | 0      | 0       | 0      | 0         |
|  |  |  | 236 | CTA | 0   | 1   | 1        | 2       | 0      | 0.5    | 0.5     | 0.6667 | 1.08432   |
|  |  |  | 237 | GGG | 1   | 0   | 1        | 2       | 1      | 0      | -1      | 1      | -2.16863  |
|  |  |  | 238 | ACA | 7   | 0   | 0.590947 | 2.40905 | 11.845 | 0      | -11.845 | 1      | -25.6883  |
|  |  |  | 239 | CAT | 2   | 0   | 0.591799 | 2.4082  | 3.3795 | 0      | -3.3795 | 1      | -7.32894  |
|  |  |  | 240 | AAT | 1   | 0   | 0.591824 | 2       | 1.6897 | 0      | -1.6897 | 1      | -3.66432  |
|  |  |  | 241 | TAT | 1   | 0   | 0.591824 | 2       | 1.6897 | 0      | -1.6897 | 1      | -3.66432  |
|  |  |  | 242 | TAT | 0.5 | 1.5 | 0.585771 | 2.41396 | 0.8536 | 0.6214 | -0.2322 | 0.8047 | -0.503534 |

|  |  |  |     |     |   |   |          |         |        |        |         |        |          |
|--|--|--|-----|-----|---|---|----------|---------|--------|--------|---------|--------|----------|
|  |  |  | 243 | AAC | 1 | 1 | 0.593932 | 2.40607 | 1.6837 | 0.4156 | -1.2681 | 0.9608 | -2.74999 |
|  |  |  | 244 | AGT | 1 | 0 | 1.58458  | 1.41542 | 0.6311 | 0      | -0.6311 | 1      | -1.36858 |
|  |  |  | 245 | CTA | 0 | 0 | 1        | 2       | 0      | 0      | 0       | 0      | 0        |
|  |  |  | 246 | GTT | 8 | 1 | 0.591332 | 2.40763 | 13.529 | 0.4153 | -13.113 | 1      | -28.4382 |
|  |  |  | 247 | GAC | 0 | 1 | 0.586729 | 2.41327 | 0      | 0.4144 | 0.41438 | 0.8044 | 0.898627 |
|  |  |  | 248 | TTC | 2 | 0 | 1        | 2       | 2      | 0      | -2      | 1      | -4.33726 |
|  |  |  | 249 | ACA | 0 | 0 | 1        | 2       | 0      | 0      | 0       | 0      | 0        |
|  |  |  | 250 | ACA | 2 | 0 | 0.592601 | 2       | 3.375  | 0      | -3.375  | 1      | -7.31902 |
|  |  |  | 251 | TAT | 0 | 0 | 0.584579 | 2.41542 | 0      | 0      | 0       | 0      | 0        |
|  |  |  | 252 | GAC | 1 | 0 | 1        | 2       | 1      | 0      | -1      | 1      | -2.16863 |
|  |  |  | 253 | GTC | 0 | 1 | 0.584579 | 2.41542 | 0      | 0.414  | 0.41401 | 0.8051 | 0.897827 |
|  |  |  | 254 | AAC | 0 | 0 | 1        | 2       | 0      | 0      | 0       | 0      | 0        |
|  |  |  | 255 | GCC | 6 | 1 | 0.662698 | 2.07567 | 9.0539 | 0.4818 | -8.5721 | 1      | -18.5898 |
|  |  |  | 256 | AAG | 2 | 1 | 0.590708 | 2.00296 | 3.3858 | 0.4993 | -2.8865 | 0.9882 | -6.25977 |
|  |  |  | 257 | TAT | 1 | 0 | 0.591824 | 2.40818 | 1.6897 | 0      | -1.6897 | 1      | -3.66432 |
|  |  |  | 258 | AAT | 1 | 1 | 0.852082 | 2.14792 | 1.1736 | 0.4656 | -0.708  | 0.9193 | -1.53545 |
|  |  |  | 259 | ATC | 0 | 0 | 0.848056 | 2.15194 | 0      | 0      | 0       | 0      | 0        |
|  |  |  | 260 | ATC | 1 | 0 | 0.58473  | 2.41527 | 1.7102 | 0      | -1.7102 | 1      | -3.70877 |
|  |  |  | 261 | GAC | 0 | 0 | 0.584579 | 2.41542 | 0      | 0      | 0       | 0      | 0        |
|  |  |  | 262 | GAC | 1 | 0 | 0.880311 | 2.11969 | 1.136  | 0      | -1.136  | 1      | -2.46348 |
|  |  |  | 263 | ATT | 0 | 0 | 1        | 2       | 0      | 0      | 0       | 0      | 0        |
|  |  |  | 264 | CCA | 3 | 0 | 0.584621 | 2.41538 | 5.1315 | 0      | -5.1315 | 1      | -11.1284 |
|  |  |  | 265 | TTC | 0 | 1 | 0.667444 | 2.06983 | 0      | 0.4831 | 0.48313 | 0.7562 | 1.04773  |
|  |  |  | 266 | AAG | 0 | 0 | 0.584579 | 2.41542 | 0      | 0      | 0       | 0      | 0        |
|  |  |  | 267 | TTC | 0 | 0 | 1        | 2       | 0      | 0      | 0       | 0      | 0        |

|     |     |     |     |     |   |   |          |         |        |        |         |        |           |
|-----|-----|-----|-----|-----|---|---|----------|---------|--------|--------|---------|--------|-----------|
|     |     |     | 268 | ACA | 2 | 1 | 1        | 2       | 2      | 0.5    | -1.5    | 0.963  | -3.25295  |
|     |     |     | 269 | CCC | 0 | 0 | 0.584579 | 2.41542 | 0      | 0      | 0       | 0      | 0         |
|     |     |     | 270 | AAC | 0 | 0 | 0        | 1.66562 | 0      | 0      | 0       | 0      | 0         |
|     |     |     | 271 | TGG | 0 | 0 | 0.667188 | 2.06982 | 0      | 0      | 0       | 0      | 0         |
|     |     |     | 272 | AAG | 0 | 0 | 0.584579 | 2.15194 | 0      | 0      | 0       | 0      | 0         |
|     |     |     | 273 | TGC | 0 | 0 | 0.584579 | 2.41542 | 0      | 0      | 0       | 0      | 0         |
|     |     |     | 274 | TTC | 0 | 0 | 1        | 2       | 0      | 0      | 0       | 0      | 0         |
|     |     |     | 275 | GTC | 5 | 0 | 1        | 1.99165 | 5      | 0      | -5      | 1      | -10.8432  |
|     |     |     | 276 | GGG | 0 | 0 | 1        | 2       | 0      | 0      | 0       | 0      | 0         |
|     |     |     | 277 | GCT | 0 | 0 | 0.667188 | 1.74823 | 0      | 0      | 0       | 0      | 0         |
|     |     |     | 278 | CAG | 1 | 2 | 0.975222 | 1.98569 | 1.0254 | 1.0072 | -0.0182 | 0.746  | -0.039469 |
|     |     |     | 279 | CGT | 0 | 2 | 0.58604  | 2.41292 | 0      | 0.8289 | 0.82887 | 0.6474 | 1.79752   |
| 280 | 280 | 280 | 280 | GAC | 0 | 0 | 0.584579 | 2.41542 | 0      | 0      | 0       | 0      | 0         |
|     |     |     | 281 | TTC | 1 | 0 | 1        | 2       | 1      | 0      | -1      | 1      | -2.16863  |
|     |     |     | 282 | ACG | 0 | 0 | 1        | 2       | 0      | 0      | 0       | 0      | 0         |
|     |     |     | 283 | GTC | 2 | 0 | 0.592339 | 2.40766 | 3.3765 | 0      | -3.3765 | 1      | -7.32227  |
|     |     |     | 284 | AAT | 1 | 0 | 1        | 2       | 1      | 0      | -1      | 1      | -2.16863  |
|     |     |     | 285 | CCA | 1 | 0 | 0.506917 | 2.23009 | 1.9727 | 0      | -1.9727 | 1      | -4.27808  |
|     |     |     | 286 | AAA | 2 | 0 | 0.588439 | 2       | 3.3988 | 0      | -3.3988 | 1      | -7.37079  |
|     |     |     | 287 | TAC | 1 | 0 | 1        | 2       | 1      | 0      | -1      | 1      | -2.16863  |
|     |     |     | 288 | GGT | 0 | 1 | 0.668986 | 2.06992 | 0      | 0.4831 | 0.48311 | 0.7557 | 1.04769   |
|     |     |     | 289 | AAG | 2 | 0 | 1.23646  | 1.23892 | 1.6175 | 0      | -1.6175 | 1      | -3.50781  |
|     |     |     | 290 | CGA | 1 | 0 | 0.489908 | 2.2471  | 2.0412 | 0      | -2.0412 | 1      | -4.42661  |
|     |     |     | 291 | AAA | 7 | 3 | 0.884555 | 2.11544 | 7.9136 | 1.4181 | -6.4954 | 0.9986 | -14.0862  |
|     |     |     | 292 | GTG | 0 | 0 | 0.511192 | 2.48881 | 0      | 0      | 0       | 0      | 0         |

|  |  |  |     |     |   |   |            |         |        |        |         |        |          |
|--|--|--|-----|-----|---|---|------------|---------|--------|--------|---------|--------|----------|
|  |  |  | 293 | ATA | 0 | 0 | 1.26348    | 1.73652 | 0      | 0      | 0       | 0      | 0        |
|  |  |  | 294 | CGG | 1 | 0 | 1          | 2       | 1      | 0      | -1      | 1      | -2.16863 |
|  |  |  | 295 | GGT | 7 | 0 | 1          | 1.97508 | 7      | 0      | -7      | 1      | -15.1804 |
|  |  |  | 296 | GGC | 0 | 0 | 0.511192   | 2.48881 | 0      | 0      | 0       | 0      | 0        |
|  |  |  | 297 | ATA | 0 | 0 | 1          | 2       | 0      | 0      | 0       | 0      | 0        |
|  |  |  | 298 | CCT | 0 | 0 | 0.584579   | 2.15194 | 0      | 0      | 0       | 0      | 0        |
|  |  |  | 299 | TGC | 0 | 0 | 0.848056   | 2.15194 | 0      | 0      | 0       | 0      | 0        |
|  |  |  | 300 | ATC | 0 | 0 | 0.883956   | 2.11604 | 0      | 0      | 0       | 0      | 0        |
|  |  |  | 301 | ATT | 0 | 0 | 1.08145    | 1.51119 | 0      | 0      | 0       | 0      | 0        |
|  |  |  | 302 | TTA | 1 | 1 | 1          | 2       | 1      | 0.5    | -0.5    | 0.8889 | -1.08432 |
|  |  |  | 303 | GTT | 1 | 0 | 0.591824   | 2.40818 | 1.6897 | 0      | -1.6897 | 1      | -3.66432 |
|  |  |  | 304 | AAT | 0 | 0 | 1          | 2       | 0      | 0      | 0       | 0      | 0        |
|  |  |  | 305 | CCA | 0 | 0 | 0.584579   | 2.41542 | 0      | 0      | 0       | 0      | 0        |
|  |  |  | 306 | GAC | 1 | 0 | 0.488992   | 2.36801 | 2.045  | 0      | -2.045  | 1      | -4.4349  |
|  |  |  | 307 | GAA | 0 | 0 | 0.592643   | 2.40736 | 0      | 0      | 0       | 0      | 0        |
|  |  |  | 308 | GAT | 0 | 1 | 0.00623261 | 1.66771 | 0      | 0.5996 | 0.59963 | 0.9963 | 1.30037  |
|  |  |  | 309 | TGG | 0 | 0 | 1          | 2       | 0      | 0      | 0       | 0      | 0        |
|  |  |  | 310 | CTC | 6 | 0 | 0.643728   | 2.09328 | 9.3207 | 0      | -9.3207 | 1      | -20.2132 |
|  |  |  | 311 | AAG | 0 | 0 | 0.592643   | 2.40736 | 0      | 0      | 0       | 0      | 0        |
|  |  |  | 312 | GAT | 0 | 0 | 0          | 3       | 0      | 0      | 0       | 0      | 0        |
|  |  |  | 313 | ATG | 1 | 0 | 1          | 2       | 1      | 0      | -1      | 1      | -2.16863 |
|  |  |  | 314 | ACT | 1 | 0 | 1          | 2       | 1      | 0      | -1      | 1      | -2.16863 |
|  |  |  | 315 | CCC | 0 | 1 | 0.499349   | 2.37217 | 0      | 0.4216 | 0.42156 | 0.8261 | 0.914196 |
|  |  |  | 316 | GAA | 0 | 0 | 0.667188   | 1.74823 | 0      | 0      | 0       | 0      | 0        |
|  |  |  | 317 | CAG | 0 | 0 | 1          | 1.73652 | 0      | 0      | 0       | 0      | 0        |

|     |  |     |     |     |        |         |            |         |        |        |         |        |          |
|-----|--|-----|-----|-----|--------|---------|------------|---------|--------|--------|---------|--------|----------|
|     |  |     | 318 | TCG | 0      | 0       | 0.592643   | 2.40736 | 0      | 0      | 0       | 0      | 0        |
|     |  |     | 319 | GAT | 0      | 0       | 0.584579   | 2       | 0      | 0      | 0       | 0      | 0        |
|     |  |     | 320 | TAC | 0      | 2       | 0.0029282  | 2.99707 | 0      | 0.6673 | 0.66732 | 0.998  | 1.44717  |
|     |  |     | 321 | ATG | 0      | 0       | 0.584579   | 2       | 0      | 0      | 0       | 0      | 0        |
|     |  |     | 322 | TAC | 1      | 0       | 1          | 2       | 1      | 0      | -1      | 1      | -2.16863 |
|     |  |     | 323 | TCT | 0      | 0       | 0.584579   | 2.41542 | 0      | 0      | 0       | 0      | 0        |
|     |  |     | 324 | AAC | 0      | 1       | 1          | 2       | 0      | 0.5    | 0.5     | 0.6667 | 1.08432  |
|     |  |     | 325 | GCT | 0      | 1       | 0.988219   | 2.01178 | 0      | 0.4971 | 0.49707 | 0.6706 | 1.07797  |
|     |  |     | 326 | GTT | 2      | 0       | 1          | 2       | 2      | 0      | -2      | 1      | -4.33726 |
|     |  |     | 327 | GTT | 1      | 0       | 0.585398   | 2.4146  | 1.7082 | 0      | -1.7082 | 1      | -3.70454 |
|     |  |     | 328 | CAC | 1      | 0       | 0.585398   | 2       | 1.7082 | 0      | -1.7082 | 1      | -3.70454 |
|     |  |     | 329 | TAC | 0.5    | 1.5     | 0.00363278 | 2.99637 | 137.64 | 0.5006 | -137.14 | 0.9988 | -297.396 |
|     |  |     | 330 | ATG | 0      | 0       | 0.592643   | 2       | 0      | 0      | 0       | 0      | 0        |
|     |  |     | 331 | TAT | 0      | 1       | 0.489601   | 2.36859 | 0      | 0.4222 | 0.42219 | 0.8287 | 0.91558  |
|     |  |     | 332 | GAA | 1      | 0       | 1          | 2       | 1      | 0      | -1      | 1      | -2.16863 |
|     |  |     | 333 | GGC | 1      | 1       | 0.651502   | 2.20654 | 1.5349 | 0.4532 | -1.0817 | 0.948  | -2.34585 |
|     |  |     | 334 | GAG | 6.6667 | 6.33333 | 0.996181   | 1.89067 | 6.6922 | 3.3498 | -3.3424 | 0.9312 | -7.24853 |
| 335 |  | 335 | 335 | ACG | 1      | 0       | 0.585398   | 2.4146  | 1.7082 | 0      | -1.7082 | 1      | -3.70454 |
|     |  |     | 336 | TTC | 1      | 1       | 0.823069   | 2.17693 | 1.215  | 0.4594 | -0.7556 | 0.9247 | -1.63862 |
|     |  |     | 337 | ATC | 1      | 2       | 0.594785   | 2.39129 | 1.6813 | 0.8364 | -0.8449 | 0.8968 | -1.83231 |
|     |  |     | 338 | AAC | 1      | 1       | 0.585398   | 2.04163 | 1.7082 | 0.4898 | -1.2184 | 0.9503 | -2.64234 |
|     |  |     | 339 | TAC | 4.5    | 1.5     | 0.981223   | 1.77697 | 4.5861 | 0.8441 | -3.742  | 0.987  | -8.11497 |
|     |  |     | 340 | TCG | 0      | 0       | 0.584579   | 2.41542 | 0      | 0      | 0       | 0      | 0        |
|     |  |     | 341 | TTC | 1      | 0       | 1          | 2       | 1      | 0      | -1      | 1      | -2.16863 |
|     |  |     | 342 | GCC | 2      | 3       | 0.955676   | 2.03348 | 2.0928 | 1.4753 | -0.6175 | 0.8099 | -1.33903 |

|     |     |     |     |     |     |     |          |         |        |        |         |        |           |
|-----|-----|-----|-----|-----|-----|-----|----------|---------|--------|--------|---------|--------|-----------|
| 343 | 343 | 343 | 343 | TCC | 1   | 2   | 0.998967 | 1.99589 | 1.001  | 1.0021 | 0.00102 | 0.7404 | 0.0022224 |
|     |     |     | 344 | GGC | 3.5 | 4.5 | 0.50515  | 2.35574 | 6.9286 | 1.9102 | -5.0184 | 0.9784 | -10.8831  |
| 345 |     | 345 | 345 | GAA | 1   | 4   | 0.600695 | 2.39931 | 1.6647 | 1.6672 | 0.00241 | 0.7368 | 0.0052266 |
| 346 |     | 346 | 346 | GAT | 1   | 2   | 1        | 2       | 1      | 1      | 0       | 0.7407 | 0         |
|     |     |     | 347 | GTC | 1   | 1   | 1        | 1.99651 | 1      | 0.5009 | -0.4991 | 0.8886 | -1.08242  |
|     |     |     | 348 | ACT | 1   | 4   | 0.995489 | 2.00352 | 1.0045 | 1.9965 | 0.99195 | 0.4637 | 2.15117   |
|     |     |     | 349 | GCT | 0   | 0   | 1        | 1.73652 | 0      | 0      | 0       | 0      | 0         |
|     |     |     | 350 | TCG | 0   | 0   | 0.667188 | 1.74823 | 0      | 0      | 0       | 0      | 0         |



D.

| Coevolutionary sites of intra-protein | Codon# | Triplet | Syn (s) | Nonsyn (n) | Syn sites (S) | Nonsyn sites (N) | $d_S$  | $d_N$  | $d_N - d_S$ | P-value | Normalized $d_N - d_S$ |
|---------------------------------------|--------|---------|---------|------------|---------------|------------------|--------|--------|-------------|---------|------------------------|
|                                       | 1      | ATG     | 0       | 0          | 0             | 3                | 0      | 0      | 0           | 0       | 0                      |
|                                       | 2      | GCC     | 1       | 4          | 1             | 2                | 1      | 2      | 1           | 0.4609  | 2.58058                |
|                                       | 3      | TCT     | 0       | 1          | 0.996298      | 2.0037           | 0      | 0.4991 | 0.49908     | 0.6679  | 1.28791                |
|                                       | 4      | TCA     | 0       | 0          | 1             | 1.54651          | 0      | 0      | 0           | 0       | 0                      |
|                                       | 5      | TCT     | 0       | 1          | 0.996298      | 2.0037           | 0      | 0.4991 | 0.49908     | 0.6679  | 1.28791                |
|                                       | 6      | ACA     | 1       | 3          | 1             | 1.99851          | 1      | 1.5011 | 0.50112     | 0.5923  | 1.29317                |
|                                       | 7      | CCC     | 0       | 1          | 0.99702       | 2.00298          | 0      | 0.4993 | 0.49926     | 0.6677  | 1.28837                |
|                                       | 8      | AGG     | 0       | 1          | 0.904486      | 2.09551          | 0      | 0.4772 | 0.47721     | 0.6985  | 1.23148                |
|                                       | 9      | TTC     | 0       | 0          | 0.546508      | 2.45349          | 0      | 0      | 0           | 0       | 0                      |
|                                       | 10     | CGA     | 8       | 0          | 1.07322       | 1.78689          | 7.4542 | 0      | -7.4542     | 1       | -19.2362               |
|                                       | 11     | GTC     | 2       | 0          | 1             | 2                | 2      | 0      | -2          | 1       | -5.16116               |
|                                       | 12     | TAT     | 0       | 0          | 0.549382      | 2                | 0      | 0      | 0           | 0       | 0                      |
|                                       | 13     | TCC     | 2       | 0          | 1             | 1.89347          | 2      | 0      | -2          | 1       | -5.16116               |
|                                       | 14     | AAG     | 1       | 0          | 0.58457       | 2.10686          | 1.7107 | 0      | -1.7107     | 1       | -4.41449               |
|                                       | 15     | TAC     | 0       | 1          | 0.546508      | 2.00148          | 0      | 0.4996 | 0.49963     | 0.7855  | 1.28933                |
|                                       | 16     | CTC     | 0       | 1          | 1             | 2                | 0      | 0.5    | 0.5         | 0.6667  | 1.29029                |
|                                       | 17     | TTT     | 1       | 0          | 0.54871       | 2.45129          | 1.8225 | 0      | -1.8225     | 1       | -4.703                 |
|                                       | 18     | CTA     | 0       | 1          | 1.54561       | 1.45439          | 0      | 0.6876 | 0.68758     | 0.4848  | 1.77434                |
|                                       | 19     | ACA     | 0       | 0          | 1             | 2                | 0      | 0      | 0           | 0       | 0                      |

|  |    |     |     |     |          |         |        |        |         |        |           |
|--|----|-----|-----|-----|----------|---------|--------|--------|---------|--------|-----------|
|  | 20 | TAT | 0   | 0   | 0.549382 | 2       | 0      | 0      | 0       | 0      | 0         |
|  | 21 | CCT | 0   | 0   | 1        | 2       | 0      | 0      | 0       | 0      | 0         |
|  | 22 | CAA | 0   | 1   | 0.420205 | 2.03395 | 0      | 0.4917 | 0.49165 | 0.8288 | 1.26875   |
|  | 23 | TGT | 1   | 0   | 0.54871  | 2.11853 | 1.8225 | 0      | -1.8225 | 1      | -4.703    |
|  | 24 | ACC | 0   | 2   | 0.959346 | 2.04065 | 0      | 0.9801 | 0.98008 | 0.4627 | 2.52917   |
|  | 25 | CTT | 0   | 0   | 1        | 2       | 0      | 0      | 0       | 0      | 0         |
|  | 26 | GAG | 1   | 2   | 0.58457  | 2.27496 | 1.7107 | 0.8791 | -0.8315 | 0.8917 | -2.14581  |
|  | 27 | CCA | 1   | 1   | 1.00811  | 1.99189 | 0.992  | 0.502  | -0.4899 | 0.8871 | -1.26428  |
|  | 28 | CAG | 0   | 2   | 0.633004 | 1.82681 | 0      | 1.0948 | 1.0948  | 0.5515 | 2.82522   |
|  | 29 | TAC | 1   | 3   | 0.553251 | 2.1083  | 1.8075 | 1.423  | -0.3846 | 0.807  | -0.992369 |
|  | 30 | GCC | 0   | 3   | 1.17989  | 1.47873 | 0      | 2.0288 | 2.02877 | 0.1721 | 5.23539   |
|  | 31 | TTG | 0   | 2   | 0.557117 | 2.43028 | 0      | 0.823  | 0.82295 | 0.6618 | 2.12369   |
|  | 32 | GAT | 1   | 1   | 1        | 1.58909 | 1      | 0.6293 | -0.3707 | 0.8508 | -0.956639 |
|  | 33 | TCA | 1   | 2   | 1.00591  | 1.99409 | 0.9941 | 1.003  | 0.00883 | 0.7381 | 0.0227929 |
|  | 34 | CTT | 1   | 1   | 0.999367 | 1.99875 | 1.0006 | 0.5003 | -0.5003 | 0.8889 | -1.29112  |
|  | 35 | CGC | 0.5 | 1.5 | 0.993493 | 2.00311 | 0.5033 | 0.7488 | 0.24556 | 0.6685 | 0.633692  |
|  | 36 | ACT | 0   | 1   | 1        | 2       | 0      | 0.5    | 0.5     | 0.6667 | 1.29029   |
|  | 37 | CTC | 1.5 | 2.5 | 1.18143  | 1.4773  | 1.2697 | 1.6923 | 0.42263 | 0.5831 | 1.09062   |
|  | 38 | TTG | 0   | 3   | 0.652574 | 2.34743 | 0      | 1.278  | 1.278   | 0.4791 | 3.29797   |
|  | 39 | AAC | 0   | 3   | 0.429788 | 2.26906 | 0      | 1.3221 | 1.32213 | 0.5943 | 3.41187   |
|  | 40 | AAA | 0   | 1   | 0.549382 | 2.00171 | 0      | 0.4996 | 0.49957 | 0.7846 | 1.28919   |
|  | 41 | TAT | 0   | 0   | 0.63475  | 2.22612 | 0      | 0      | 0       | 0      | 0         |
|  | 42 | GAG | 2   | 0   | 1        | 2       | 2      | 0      | -2      | 1      | -5.16116  |
|  | 43 | CCC | 2   | 1   | 1.00179  | 1.99821 | 1.9964 | 0.5004 | -1.496  | 0.9628 | -3.86049  |
|  | 44 | CTC | 0   | 0   | 0.546508 | 2       | 0      | 0      | 0       | 0      | 0         |

|    |    |     |   |   |          |         |        |        |         |        |          |
|----|----|-----|---|---|----------|---------|--------|--------|---------|--------|----------|
|    | 45 | TAC | 0 | 0 | 0.832532 | 2.16747 | 0      | 0      | 0       | 0      | 0        |
|    | 46 | ATC | 1 | 0 | 1        | 2       | 1      | 0      | -1      | 1      | -2.58058 |
|    | 47 | GCT | 1 | 3 | 1        | 2       | 1      | 1.5    | 0.5     | 0.5926 | 1.29029  |
|    | 48 | GCT | 0 | 0 | 1        | 2       | 0      | 0      | 0       | 0      | 0        |
|    | 49 | GTT | 0 | 0 | 0.691427 | 2       | 0      | 0      | 0       | 0      | 0        |
|    | 50 | AGA | 0 | 0 | 0.63475  | 2.22612 | 0      | 0      | 0       | 0      | 0        |
|    | 51 | GAG | 1 | 0 | 1        | 2       | 1      | 0      | -1      | 1      | -2.58058 |
|    | 52 | CTC | 0 | 0 | 0.546508 | 2.45349 | 0      | 0      | 0       | 0      | 0        |
|    | 53 | CAC | 0 | 0 | 0.420205 | 2.44066 | 0      | 0      | 0       | 0      | 0        |
|    | 54 | GAA | 0 | 1 | 0.549382 | 2.45062 | 0      | 0.4081 | 0.40806 | 0.8169 | 1.05303  |
|    | 55 | GAT | 0 | 0 | 1        | 1.86087 | 0      | 0      | 0       | 0      | 0        |
|    | 56 | GGA | 0 | 0 | 1        | 1.54651 | 0      | 0      | 0       | 0      | 0        |
|    | 57 | TCA | 0 | 0 | 1        | 2       | 0      | 0      | 0       | 0      | 0        |
|    | 58 | CCA | 0 | 0 | 0.549382 | 2.45062 | 0      | 0      | 0       | 0      | 0        |
|    | 59 | CAT | 3 | 0 | 1.53698  | 1.45734 | 1.9519 | 0      | -1.9519 | 1      | -5.03699 |
|    | 60 | CTG | 0 | 0 | 0.546508 | 2.45349 | 0      | 0      | 0       | 0      | 0        |
|    | 61 | CAC | 1 | 1 | 0.99966  | 2.00034 | 1.0003 | 0.4999 | -0.5004 | 0.889  | -1.29139 |
|    | 62 | GTT | 0 | 0 | 1        | 2       | 0      | 0      | 0       | 0      | 0        |
|    | 63 | CTC | 0 | 0 | 1        | 2       | 0      | 0      | 0       | 0      | 0        |
|    | 64 | GTG | 2 | 0 | 0.614255 | 1.83924 | 3.256  | 0      | -3.256  | 1      | -8.4023  |
|    | 65 | CAG | 0 | 0 | 0.546508 | 2.45349 | 0      | 0      | 0       | 0      | 0        |
|    | 66 | AAC | 0 | 1 | 0.637426 | 2.05705 | 0      | 0.4861 | 0.48613 | 0.7634 | 1.25451  |
| 67 | 67 | AAG | 0 | 0 | 1        | 2       | 0      | 0      | 0       | 0      | 0        |
|    | 68 | CTT | 0 | 0 | 1        | 2       | 0      | 0      | 0       | 0      | 0        |
|    | 69 | CGT | 0 | 0 | 1        | 2       | 0      | 0      | 0       | 0      | 0        |

|    |    |     |   |   |          |         |        |        |         |        |           |
|----|----|-----|---|---|----------|---------|--------|--------|---------|--------|-----------|
|    | 70 | GCT | 4 | 0 | 1        | 1.90649 | 4      | 0      | -4      | 1      | -10.3223  |
|    | 71 | TCC | 0 | 0 | 0.832532 | 2.16747 | 0      | 0      | 0       | 0      | 0         |
|    | 72 | ATC | 0 | 0 | 1        | 2       | 0      | 0      | 0       | 0      | 0         |
|    | 73 | ACC | 0 | 0 | 0.549382 | 2.45062 | 0      | 0      | 0       | 0      | 0         |
|    | 74 | AAT | 1 | 0 | 1        | 2       | 1      | 0      | -1      | 1      | -2.58058  |
|    | 75 | CCC | 0 | 2 | 0.549382 | 2.45062 | 0      | 0.8161 | 0.81612 | 0.6673 | 2.10606   |
| 76 | 76 | AAT | 3 | 0 | 1        | 2       | 3      | 0      | -3      | 1      | -7.74174  |
|    | 77 | GCC | 2 | 1 | 0.983898 | 1.76194 | 2.0327 | 0.5676 | -1.4652 | 0.954  | -3.781    |
|    | 78 | TTA | 0 | 1 | 0.546508 | 2.44902 | 0      | 0.4083 | 0.40833 | 0.8176 | 1.05372   |
| 79 | 79 | AAC | 3 | 0 | 1.00089  | 1.99911 | 2.9973 | 0      | -2.9973 | 1      | -7.73482  |
|    | 80 | CTC | 0 | 0 | 1        | 2       | 0      | 0      | 0       | 0      | 0         |
|    | 81 | CGT | 0 | 0 | 0        | 3       | 0      | 0      | 0       | 0      | 0         |
|    | 82 | ATG | 1 | 0 | 0.54871  | 2.45129 | 1.8225 | 0      | -1.8225 | 1      | -4.703    |
|    | 83 | GAT | 0 | 0 | 1        | 2       | 0      | 0      | 0       | 0      | 0         |
|    | 84 | ACA | 1 | 0 | 1        | 2       | 1      | 0      | -1      | 1      | -2.58058  |
|    | 85 | TCT | 0 | 0 | 1        | 2       | 0      | 0      | 0       | 0      | 0         |
|    | 86 | CCA | 3 | 1 | 0.550018 | 2.44702 | 5.4544 | 0.4087 | -5.0457 | 0.9989 | -13.0209  |
|    | 87 | TTC | 1 | 2 | 0.959168 | 2.02722 | 1.0426 | 0.9866 | -0.056  | 0.7568 | -0.144509 |
|    | 88 | TCC | 2 | 0 | 0.654367 | 2.34563 | 3.0564 | 0      | -3.0564 | 1      | -7.88726  |
|    | 89 | ATA | 1 | 0 | 0.546522 | 2.45348 | 1.8298 | 0      | -1.8298 | 1      | -4.72182  |
|    | 90 | TTC | 1 | 0 | 0.54871  | 2.45129 | 1.8225 | 0      | -1.8225 | 1      | -4.703    |
|    | 91 | CAT | 1 | 0 | 1        | 2       | 1      | 0      | -1      | 1      | -2.58058  |
|    | 92 | CCT | 0 | 1 | 0.549382 | 2.44617 | 0      | 0.4088 | 0.4088  | 0.8166 | 1.05495   |
| 93 | 93 | AAT | 1 | 2 | 0.636909 | 2.36106 | 1.5701 | 0.8471 | -0.723  | 0.8838 | -1.86578  |
| 94 | 94 | ATA | 1 | 0 | 0.470384 | 1.98311 | 2.1259 | 0      | -2.1259 | 1      | -5.48611  |

|     |     |     |   |   |          |         |        |        |         |        |          |
|-----|-----|-----|---|---|----------|---------|--------|--------|---------|--------|----------|
|     | 95  | CAA | 1 | 0 | 1        | 2       | 1      | 0      | -1      | 1      | -2.58058 |
|     | 96  | GCT | 0 | 0 | 1        | 2       | 0      | 0      | 0       | 0      | 0        |
|     | 97  | GCC | 0 | 0 | 0.420205 | 2.27122 | 0      | 0      | 0       | 0      | 0        |
|     | 98  | AAA | 3 | 1 | 0.548708 | 2.45129 | 5.4674 | 0.4079 | -5.0594 | 0.9989 | -13.0563 |
|     | 99  | GAC | 0 | 1 | 0.549488 | 2.16637 | 0      | 0.4616 | 0.4616  | 0.7977 | 1.1912   |
|     | 100 | TGC | 1 | 1 | 0.546607 | 2.45339 | 1.8295 | 0.4076 | -1.4219 | 0.9668 | -3.66925 |
|     | 101 | AAC | 1 | 1 | 0.426629 | 2.03226 | 2.344  | 0.4921 | -1.8519 | 0.9699 | -4.77896 |
| 102 | 102 | CAA | 1 | 0 | 1        | 2       | 1      | 0      | -1      | 1      | -2.58058 |
|     | 103 | GTT | 0 | 0 | 1        | 2       | 0      | 0      | 0       | 0      | 0        |
|     | 104 | CGT | 0 | 0 | 0.549382 | 2.45062 | 0      | 0      | 0       | 0      | 0        |
|     | 105 | GAT | 2 | 0 | 0.546574 | 2       | 3.6592 | 0      | -3.6592 | 1      | -9.44275 |
|     | 106 | TAC | 0 | 1 | 0.833355 | 2.16665 | 0      | 0.4615 | 0.46154 | 0.7222 | 1.19105  |
|     | 107 | ATC | 0 | 1 | 1        | 2       | 0      | 0.5    | 0.5     | 0.6667 | 1.29029  |
|     | 108 | ACG | 3 | 1 | 0.606191 | 2.08727 | 4.9489 | 0.4791 | -4.4698 | 0.9974 | -11.5348 |
| 109 | 109 | AAG | 1 | 0 | 0.634047 | 2.22682 | 1.5772 | 0      | -1.5772 | 1      | -4.07001 |
|     | 110 | GAG | 0 | 0 | 1        | 2       | 0      | 0      | 0       | 0      | 0        |
|     | 111 | GTT | 0 | 0 | 0.546508 | 2.45349 | 0      | 0      | 0       | 0      | 0        |
|     | 112 | GAC | 0 | 0 | 1        | 2       | 0      | 0      | 0       | 0      | 0        |
|     | 113 | TCC | 0 | 0 | 0.549382 | 2.45062 | 0      | 0      | 0       | 0      | 0        |
|     | 114 | GAT | 1 | 5 | 1.0009   | 1.9991  | 0.9991 | 2.5011 | 1.50201 | 0.3506 | 3.87607  |
|     | 115 | GTA | 0 | 0 | 0.546508 | 2.45349 | 0      | 0      | 0       | 0      | 0        |
|     | 116 | AAC | 1 | 0 | 1        | 2       | 1      | 0      | -1      | 1      | -2.58058 |
|     | 117 | ACA | 0 | 0 | 1        | 2       | 0      | 0      | 0       | 0      | 0        |
|     | 118 | GCT | 0 | 0 | 0.63475  | 2.22612 | 0      | 0      | 0       | 0      | 0        |
|     | 119 | GAG | 0 | 0 | 0        | 1.7305  | 0      | 0      | 0       | 0      | 0        |

|  |     |     |     |     |          |         |        |        |         |        |           |
|--|-----|-----|-----|-----|----------|---------|--------|--------|---------|--------|-----------|
|  | 120 | TGG | 0   | 0   | 1        | 1.86087 | 0      | 0      | 0       | 0      | 0         |
|  | 121 | GGA | 0   | 0   | 1        | 2       | 0      | 0      | 0       | 0      | 0         |
|  | 122 | ACA | 0   | 0   | 0.546508 | 2.45349 | 0      | 0      | 0       | 0      | 0         |
|  | 123 | TTC | 1.5 | 1.5 | 0.944411 | 2.05559 | 1.5883 | 0.7297 | -0.8586 | 0.8669 | -2.21562  |
|  | 124 | GTG | 4   | 1   | 1        | 2       | 4      | 0.5    | -3.5    | 0.9959 | -9.03203  |
|  | 125 | GCT | 0   | 1   | 1        | 2       | 0      | 0.5    | 0.5     | 0.6667 | 1.29029   |
|  | 126 | GTT | 1   | 1   | 1        | 1.6013  | 1      | 0.6245 | -0.3755 | 0.8522 | -0.969025 |
|  | 127 | TCA | 1   | 0   | 1        | 2       | 1      | 0      | -1      | 1      | -2.58058  |
|  | 128 | ACT | 1   | 1   | 1        | 2       | 1      | 0.5    | -0.5    | 0.8889 | -1.29029  |
|  | 129 | CCA | 0   | 0   | 1        | 2       | 0      | 0      | 0       | 0      | 0         |
|  | 130 | GGT | 0   | 0   | 1        | 2       | 0      | 0      | 0       | 0      | 0         |
|  | 131 | CGT | 1   | 0   | 0.420908 | 2.27052 | 2.3758 | 0      | -2.3758 | 1      | -6.13099  |
|  | 132 | AAA | 0   | 1   | 0.547993 | 2.45201 | 0      | 0.4078 | 0.40783 | 0.8173 | 1.05244   |
|  | 133 | GAC | 0   | 0   | 1        | 2       | 0      | 0      | 0       | 0      | 0         |
|  | 134 | CGT | 5   | 0   | 0.549027 | 2.45097 | 9.107  | 0      | -9.107  | 1      | -23.5014  |
|  | 135 | GAT | 2   | 0   | 1        | 2       | 2      | 0      | -2      | 1      | -5.16116  |
|  | 136 | GCG | 0   | 0   | 0.549382 | 2.45062 | 0      | 0      | 0       | 0      | 0         |
|  | 137 | GAT | 0   | 0   | 0        | 3       | 0      | 0      | 0       | 0      | 0         |
|  | 138 | ATG | 0   | 0   | 0.420205 | 2.27122 | 0      | 0      | 0       | 0      | 0         |
|  | 139 | AAA | 1   | 0   | 0.622454 | 1.83104 | 1.6065 | 0      | -1.6065 | 1      | -4.14581  |
|  | 140 | CAG | 0   | 0   | 0.832532 | 2.16747 | 0      | 0      | 0       | 0      | 0         |
|  | 141 | ATC | 1   | 0   | 0.890627 | 2.10937 | 1.1228 | 0      | -1.1228 | 1      | -2.89749  |
|  | 142 | ATT | 1   | 0   | 0.439646 | 2.42122 | 2.2746 | 0      | -2.2746 | 1      | -5.86968  |
|  | 143 | GAA | 5   | 0   | 1        | 1.95668 | 5      | 0      | -5      | 1      | -12.9029  |
|  | 144 | TCT | 0   | 2   | 0.559739 | 2.43628 | 0      | 0.8209 | 0.82092 | 0.6613 | 2.11846   |

|  |     |     |   |   |          |         |        |        |         |        |          |
|--|-----|-----|---|---|----------|---------|--------|--------|---------|--------|----------|
|  | 145 | AGT | 0 | 0 | 1        | 2       | 0      | 0      | 0       | 0      | 0        |
|  | 146 | TCC | 1 | 0 | 1        | 2       | 1      | 0      | -1      | 1      | -2.58058 |
|  | 147 | TCT | 3 | 0 | 1.00094  | 1.99906 | 2.9972 | 0      | -2.9972 | 1      | -7.73449 |
|  | 148 | CGC | 0 | 1 | 0.63475  | 2.22529 | 0      | 0.4494 | 0.44938 | 0.7781 | 1.15966  |
|  | 149 | GAG | 0 | 0 | 0.420205 | 2.44066 | 0      | 0      | 0       | 0      | 0        |
|  | 150 | GAA | 2 | 0 | 0.546773 | 2.45323 | 3.6578 | 0      | -3.6578 | 1      | -9.43931 |
|  | 151 | TTC | 0 | 0 | 1        | 2       | 0      | 0      | 0       | 0      | 0        |
|  | 152 | CTC | 1 | 0 | 0.546527 | 2.45347 | 1.8297 | 0      | -1.8297 | 1      | -4.72178 |
|  | 153 | AGC | 0 | 0 | 0        | 3       | 0      | 0      | 0       | 0      | 0        |
|  | 154 | ATG | 1 | 0 | 1        | 2       | 1      | 0      | -1      | 1      | -2.58058 |
|  | 155 | GTT | 0 | 0 | 0.546508 | 2.16747 | 0      | 0      | 0       | 0      | 0        |
|  | 156 | TGC | 0 | 2 | 0.549382 | 2.45062 | 0      | 0.8161 | 0.81612 | 0.6673 | 2.10606  |
|  | 157 | AAT | 1 | 0 | 1.00047  | 1.99864 | 0.9995 | 0      | -0.9995 | 1      | -2.57937 |
|  | 158 | CGT | 1 | 1 | 0.552329 | 2.44767 | 1.8105 | 0.4086 | -1.402  | 0.9661 | -3.61788 |
|  | 159 | TTT | 1 | 0 | 1        | 2       | 1      | 0      | -1      | 1      | -2.58058 |
|  | 160 | CCG | 0 | 0 | 0.549382 | 2.45062 | 0      | 0      | 0       | 0      | 0        |
|  | 161 | TTT | 0 | 0 | 0.420205 | 2.44066 | 0      | 0      | 0       | 0      | 0        |
|  | 162 | GAA | 0 | 0 | 0        | 1.7305  | 0      | 0      | 0       | 0      | 0        |
|  | 163 | TGG | 3 | 0 | 1        | 1.9328  | 3      | 0      | -3      | 1      | -7.74174 |
|  | 164 | TCT | 3 | 0 | 0.773223 | 2.22678 | 3.8799 | 0      | -3.8799 | 1      | -10.0123 |
|  | 165 | ATC | 0 | 0 | 1        | 2       | 0      | 0      | 0       | 0      | 0        |
|  | 166 | CGT | 4 | 0 | 1.01799  | 1.98201 | 3.9293 | 0      | -3.9293 | 1      | -10.1399 |
|  | 167 | CTC | 0 | 0 | 0.420205 | 2.27122 | 0      | 0      | 0       | 0      | 0        |
|  | 168 | AAA | 0 | 1 | 0.54725  | 2.45275 | 0      | 0.4077 | 0.40771 | 0.8176 | 1.05212  |
|  | 169 | GAC | 0 | 0 | 0.546508 | 2.45349 | 0      | 0      | 0       | 0      | 0        |

|  |     |     |   |   |          |         |        |        |         |        |          |
|--|-----|-----|---|---|----------|---------|--------|--------|---------|--------|----------|
|  | 170 | TTC | 1 | 0 | 0.615309 | 2.24556 | 1.6252 | 0      | -1.6252 | 1      | -4.19396 |
|  | 171 | GAG | 0 | 0 | 0.546508 | 2       | 0      | 0      | 0       | 0      | 0        |
|  | 172 | TAC | 1 | 1 | 0.9976   | 2.00037 | 1.0024 | 0.4999 | -0.5025 | 0.8893 | -1.29674 |
|  | 173 | ACG | 0 | 0 | 1        | 2       | 0      | 0      | 0       | 0      | 0        |
|  | 174 | GCA | 1 | 0 | 1.02592  | 1.92456 | 0.9747 | 0      | -0.9747 | 1      | -2.51539 |
|  | 175 | CGC | 0 | 0 | 0.549382 | 2.45062 | 0      | 0      | 0       | 0      | 0        |
|  | 176 | CAT | 0 | 0 | 1.54651  | 1.45349 | 0      | 0      | 0       | 0      | 0        |
|  | 177 | CTA | 1 | 0 | 0.549121 | 2.45088 | 1.8211 | 0      | -1.8211 | 1      | -4.69947 |
|  | 178 | TTT | 1 | 0 | 1        | 2       | 1      | 0      | -1      | 1      | -2.58058 |
|  | 179 | CCT | 0 | 0 | 0.546508 | 2.45349 | 0      | 0      | 0       | 0      | 0        |
|  | 180 | GAC | 0 | 1 | 0.998101 | 2.00011 | 0      | 0.5    | 0.49997 | 0.6671 | 1.29022  |
|  | 181 | CCA | 0 | 0 | 1        | 2       | 0      | 0      | 0       | 0      | 0        |
|  | 182 | GTT | 1 | 1 | 1        | 2       | 1      | 0.5    | -0.5    | 0.8889 | -1.29029 |
|  | 183 | GCC | 0 | 0 | 1        | 2       | 0      | 0      | 0       | 0      | 0        |
|  | 184 | ACT | 0 | 0 | 0.546508 | 2       | 0      | 0      | 0       | 0      | 0        |
|  | 185 | TAC | 0 | 1 | 1        | 2       | 0      | 0.5    | 0.5     | 0.6667 | 1.29029  |
|  | 186 | ACA | 2 | 1 | 1        | 2       | 2      | 0.5    | -1.5    | 0.963  | -3.87087 |
|  | 187 | CCT | 0 | 0 | 0.63475  | 2.22612 | 0      | 0      | 0       | 0      | 0        |
|  | 188 | GAG | 1 | 0 | 0.549121 | 2.45088 | 1.8211 | 0      | -1.8211 | 1      | -4.69947 |
|  | 189 | TTT | 2 | 0 | 1        | 2       | 2      | 0      | -2      | 1      | -5.16116 |
|  | 190 | CCA | 0 | 1 | 0.984825 | 2.01517 | 0      | 0.4962 | 0.49624 | 0.6717 | 1.28057  |
|  | 191 | ACC | 0 | 2 | 0.421254 | 2.44076 | 0      | 0.8194 | 0.81942 | 0.7273 | 2.11458  |
|  | 192 | GAA | 2 | 0 | 1        | 1.59058 | 2      | 0      | -2      | 1      | -5.16116 |
|  | 193 | TCA | 0 | 0 | 1        | 2       | 0      | 0      | 0       | 0      | 0        |
|  | 194 | CTC | 4 | 1 | 0.781398 | 2.2186  | 5.119  | 0.4507 | -4.6683 | 0.9988 | -12.0469 |



|  |     |     |   |   |          |         |        |        |         |        |          |
|--|-----|-----|---|---|----------|---------|--------|--------|---------|--------|----------|
|  | 195 | ATT | 4 | 0 | 0.546905 | 2.15864 | 7.3139 | 0      | -7.3139 | 1      | -18.8741 |
|  | 196 | TGC | 1 | 0 | 0.549372 | 2.45063 | 1.8203 | 0      | -1.8203 | 1      | -4.69732 |
|  | 197 | CAT | 3 | 0 | 0.624546 | 2.23632 | 4.8035 | 0      | -4.8035 | 1      | -12.3958 |
|  | 198 | GAG | 0 | 0 | 1        | 2       | 0      | 0      | 0       | 0      | 0        |
|  | 199 | ACC | 0 | 0 | 0.896415 | 2.10358 | 0      | 0      | 0       | 0      | 0        |
|  | 200 | ATT | 0 | 0 | 0.420205 | 2.44066 | 0      | 0      | 0       | 0      | 0        |
|  | 201 | GAA | 0 | 0 | 0.546508 | 2.45349 | 0      | 0      | 0       | 0      | 0        |
|  | 202 | AGC | 0 | 0 | 0        | 1.7305  | 0      | 0      | 0       | 0      | 0        |
|  | 203 | TGG | 0 | 0 | 0.420205 | 2.27122 | 0      | 0      | 0       | 0      | 0        |
|  | 204 | AAA | 0 | 0 | 0.549382 | 2.45062 | 0      | 0      | 0       | 0      | 0        |
|  | 205 | AAT | 0 | 0 | 0.420205 | 2.44066 | 0      | 0      | 0       | 0      | 0        |
|  | 206 | GAA | 1 | 0 | 0.549121 | 2.45088 | 1.8211 | 0      | -1.8211 | 1      | -4.69947 |
|  | 207 | CAT | 2 | 0 | 1.25449  | 1.74551 | 1.5943 | 0      | -1.5943 | 1      | -4.11416 |
|  | 208 | CTA | 0 | 0 | 0.546508 | 2       | 0      | 0      | 0       | 0      | 0        |
|  | 209 | TAC | 5 | 0 | 1        | 1.99812 | 5      | 0      | -5      | 1      | -12.9029 |
|  | 210 | TCT | 0 | 1 | 1.00359  | 1.99641 | 0      | 0.5009 | 0.5009  | 0.6655 | 1.29261  |
|  | 211 | GTA | 0 | 1 | 0.546508 | 2.45349 | 0      | 0.4076 | 0.40758 | 0.8178 | 1.0518   |
|  | 212 | AGC | 0 | 0 | 1        | 2       | 0      | 0      | 0       | 0      | 0        |
|  | 213 | CTC | 0 | 0 | 0.420205 | 2.44066 | 0      | 0      | 0       | 0      | 0        |
|  | 214 | GAA | 4 | 0 | 1        | 1.9232  | 4      | 0      | -4      | 1      | -10.3223 |
|  | 215 | TCC | 1 | 1 | 0.549121 | 2.00074 | 1.8211 | 0.4998 | -1.3213 | 0.9536 | -3.40966 |
|  | 216 | TAT | 1 | 0 | 0.832636 | 2.16736 | 1.201  | 0      | -1.201  | 1      | -3.09929 |
|  | 217 | ATC | 0 | 1 | 0.99983  | 2.00017 | 0      | 0.5    | 0.49996 | 0.6667 | 1.29018  |
|  | 218 | CTT | 0 | 0 | 0.549382 | 2.10358 | 0      | 0      | 0       | 0      | 0        |
|  | 219 | TGT | 0 | 0 | 1        | 2       | 0      | 0      | 0       | 0      | 0        |

|     |     |     |     |     |            |         |        |        |         |        |          |
|-----|-----|-----|-----|-----|------------|---------|--------|--------|---------|--------|----------|
|     | 220 | ACT | 1   | 0   | 1          | 1.99702 | 1      | 0      | -1      | 1      | -2.58058 |
|     | 221 | TCC | 0   | 0   | 1          | 2       | 0      | 0      | 0       | 0      | 0        |
|     | 222 | ACT | 0   | 0   | 1          | 2       | 0      | 0      | 0       | 0      | 0        |
|     | 223 | CCT | 0   | 0   | 1          | 2       | 0      | 0      | 0       | 0      | 0        |
|     | 224 | GCG | 0   | 0   | 0.549382   | 2.45062 | 0      | 0      | 0       | 0      | 0        |
|     | 225 | GAT | 1   | 2   | 0.420908   | 2.05615 | 2.3758 | 0.9727 | -1.4031 | 0.9232 | -3.62088 |
|     | 226 | CAA | 1   | 0   | 1          | 2       | 1      | 0      | -1      | 1      | -2.58058 |
|     | 227 | GCG | 0   | 2   | 0.48925    | 2.02607 | 0      | 0.9871 | 0.98713 | 0.6488 | 2.54738  |
|     | 228 | CAA | 0   | 0   | 1          | 2       | 0      | 0      | 0       | 0      | 0        |
|     | 229 | TCT | 0   | 0   | 0.546508   | 2.45349 | 0      | 0      | 0       | 0      | 0        |
|     | 230 | GAC | 0   | 0   | 0.969587   | 1.57979 | 0      | 0      | 0       | 0      | 0        |
|     | 231 | TTA | 0   | 0   | 0.63475    | 2.22612 | 0      | 0      | 0       | 0      | 0        |
|     | 232 | GAG | 0   | 1   | 0.00361364 | 1.73295 | 0      | 0.577  | 0.57705 | 0.9979 | 1.48912  |
| 233 | 233 | TGG | 0   | 1   | 0.00103852 | 2.99846 | 0      | 0.3335 | 0.33351 | 0.9997 | 0.860636 |
|     | 234 | ATG | 0   | 0   | 0.546508   | 2.45349 | 0      | 0      | 0       | 0      | 0        |
|     | 235 | GAC | 0   | 1   | 0.549382   | 2.45062 | 0      | 0.4081 | 0.40806 | 0.8169 | 1.05303  |
|     | 236 | GAT | 0   | 1   | 0.549382   | 2.00222 | 0      | 0.4994 | 0.49945 | 0.7847 | 1.28886  |
|     | 237 | TAT | 0   | 0   | 1          | 2       | 0      | 0      | 0       | 0      | 0        |
|     | 238 | TCC | 0   | 1   | 0.903004   | 2.09284 | 0      | 0.4778 | 0.47782 | 0.6986 | 1.23305  |
|     | 239 | AGG | 0   | 0   | 0.549382   | 2.45062 | 0      | 0      | 0       | 0      | 0        |
|     | 240 | AGT | 0   | 0   | 0.546508   | 2.45349 | 0      | 0      | 0       | 0      | 0        |
|     | 241 | CAC | 0   | 5   | 1.24528    | 1.72053 | 0      | 2.9061 | 2.90608 | 0.0657 | 7.49938  |
|     | 242 | CGG | 0.5 | 1.5 | 0.955092   | 1.91838 | 0.5235 | 0.7819 | 0.2584  | 0.6676 | 0.666818 |
|     | 243 | GGA | 0   | 0   | 1          | 2       | 0      | 0      | 0       | 0      | 0        |
|     | 244 | GGC | 0   | 0   | 0.579795   | 2.42021 | 0      | 0      | 0       | 0      | 0        |

|  |     |     |   |   |          |         |        |        |         |        |          |
|--|-----|-----|---|---|----------|---------|--------|--------|---------|--------|----------|
|  | 245 | ATA | 0 | 3 | 0.549382 | 2.45062 | 0      | 1.2242 | 1.22418 | 0.5451 | 3.1591   |
|  | 246 | AGT | 1 | 0 | 1        | 2       | 1      | 0      | -1      | 1      | -2.58058 |
|  | 247 | CCA | 0 | 1 | 0.959168 | 2       | 0      | 0.5    | 0.5     | 0.6759 | 1.29029  |
|  | 248 | TCT | 1 | 0 | 1        | 2       | 1      | 0      | -1      | 1      | -2.58058 |
|  | 249 | ACA | 0 | 1 | 1        | 2       | 0      | 0.5    | 0.5     | 0.6667 | 1.29029  |
|  | 250 | TCT | 0 | 0 | 1        | 2       | 0      | 0      | 0       | 0      | 0        |
|  | 251 | GCG | 0 | 2 | 0.95297  | 2.04703 | 0      | 0.977  | 0.97703 | 0.4656 | 2.52129  |
|  | 252 | GGC | 0 | 0 | 0.420205 | 2.03329 | 0      | 0      | 0       | 0      | 0        |
|  | 253 | CAA | 0 | 4 | 0.944595 | 2.00051 | 0      | 1.9995 | 1.99949 | 0.2129 | 5.15985  |
|  | 254 | CCA | 0 | 0 | 0.420205 | 2.44066 | 0      | 0      | 0       | 0      | 0        |
|  | 255 | GAA | 1 | 1 | 0.637383 | 1.8179  | 1.5689 | 0.5501 | -1.0188 | 0.9326 | -2.62917 |
|  | 256 | CAG | 0 | 1 | 0.423055 | 2.43781 | 0      | 0.4102 | 0.4102  | 0.8521 | 1.05856  |
|  | 257 | GAA | 0 | 0 | 0.691427 | 2       | 0      | 0      | 0       | 0      | 0        |
|  | 258 | AGA | 0 | 0 | 1        | 2       | 0      | 0      | 0       | 0      | 0        |
|  | 259 | CTT | 0 | 0 | 1        | 2       | 0      | 0      | 0       | 0      | 0        |
|  | 260 | CCT | 0 | 0 | 1        | 2       | 0      | 0      | 0       | 0      | 0        |
|  | 261 | GGG | 0 | 1 | 0.420826 | 2.03535 | 0      | 0.4913 | 0.49132 | 0.8287 | 1.26788  |
|  | 262 | CAA | 0 | 0 | 1        | 2       | 0      | 0      | 0       | 0      | 0        |
|  | 263 | GGT | 0 | 1 | 1        | 2       | 0      | 0.5    | 0.5     | 0.6667 | 1.29029  |

E.

| Coevolutionary sites of intra-protein | Codon# | Triplet | Syn (s) | Nonsyn (n) | Syn sites (S) | Nonsyn sites (N) | $d_S$ | $d_N$ | $d_N - d_S$ | P-value | Normalized $d_N - d_S$ |
|---------------------------------------|--------|---------|---------|------------|---------------|------------------|-------|-------|-------------|---------|------------------------|
|                                       | 1      | ATG     | 0       | 0          | 0             | 3                | 0     | 0     | 0           | 0       | 0                      |
|                                       | 2      | GTG     | 0       | 0          | 1             | 2                | 0     | 0     | 0           | 0       | 0                      |
|                                       | 3      | ACC     | 0       | 0          | 1             | 2                | 0     | 0     | 0           | 0       | 0                      |
|                                       | 4      | AAC     | 0       | 0          | 0.580584      | 2.41942          | 0     | 0     | 0           | 0       | 0                      |
|                                       | 5      | AAG     | 0       | 0          | 0.555986      | 2.27732          | 0     | 0     | 0           | 0       | 0                      |
|                                       | 6      | GAC     | 0       | 0          | 0.580584      | 2.41942          | 0     | 0     | 0           | 0       | 0                      |
|                                       | 7      | TCC     | 0       | 0          | 1             | 2                | 0     | 0     | 0           | 0       | 0                      |
|                                       | 8      | CGA     | 0       | 0          | 1.28935       | 1.13007          | 0     | 0     | 0           | 0       | 0                      |
|                                       | 9      | GGT     | 0       | 0          | 1             | 2                | 0     | 0     | 0           | 0       | 0                      |
|                                       | 10     | AAG     | 0       | 0          | 0.555986      | 2.27732          | 0     | 0     | 0           | 0       | 0                      |
|                                       | 11     | GGA     | 0       | 0          | 1             | 1.70645          | 0     | 0     | 0           | 0       | 0                      |
|                                       | 12     | AAG     | 0       | 0          | 0.555986      | 2.27732          | 0     | 0     | 0           | 0       | 0                      |
|                                       | 13     | AGG     | 0       | 0          | 0.862346      | 2.13765          | 0     | 0     | 0           | 0       | 0                      |
|                                       | 14     | AAG     | 0       | 0          | 0.555986      | 2.27732          | 0     | 0     | 0           | 0       | 0                      |
|                                       | 15     | CTC     | 0       | 0          | 1             | 2                | 0     | 0     | 0           | 0       | 0                      |
|                                       | 16     | GAG     | 0       | 0          | 0.555986      | 2.15047          | 0     | 0     | 0           | 0       | 0                      |
|                                       | 17     | GAG     | 0       | 0          | 0.555986      | 2.15047          | 0     | 0     | 0           | 0       | 0                      |
|                                       | 18     | GGC     | 0       | 0          | 1             | 2                | 0     | 0     | 0           | 0       | 0                      |

|    |    |     |   |   |          |         |        |        |         |        |          |
|----|----|-----|---|---|----------|---------|--------|--------|---------|--------|----------|
|    | 19 | GAA | 0 | 0 | 0.526942 | 2.17951 | 0      | 0      | 0       | 0      | 0        |
|    | 20 | TCG | 0 | 1 | 1.00295  | 1.71046 | 0      | 0.5846 | 0.58464 | 0.6304 | 6.20618  |
|    | 21 | AGT | 0 | 0 | 0.588602 | 2.4114  | 0      | 0      | 0       | 0      | 0        |
|    | 22 | GGA | 0 | 0 | 1        | 1.70645 | 0      | 0      | 0       | 0      | 0        |
|    | 23 | AGG | 0 | 0 | 0.862346 | 2.13765 | 0      | 0      | 0       | 0      | 0        |
|    | 24 | TGG | 0 | 0 | 0        | 1.88803 | 0      | 0      | 0       | 0      | 0        |
|    | 25 | AAG | 0 | 0 | 0.555986 | 2.27732 | 0      | 0      | 0       | 0      | 0        |
|    | 26 | GGG | 0 | 0 | 1        | 2       | 0      | 0      | 0       | 0      | 0        |
|    | 27 | CAA | 0 | 0 | 0.526942 | 1.89247 | 0      | 0      | 0       | 0      | 0        |
|    | 28 | GTG | 0 | 0 | 1        | 2       | 0      | 0      | 0       | 0      | 0        |
|    | 29 | TAT | 0 | 0 | 0.588602 | 2       | 0      | 0      | 0       | 0      | 0        |
|    | 30 | AAG | 0 | 0 | 0.555986 | 2.27732 | 0      | 0      | 0       | 0      | 0        |
|    | 31 | CGG | 1 | 0 | 1.26884  | 1.73116 | 0.7881 | 0      | -0.7881 | 1      | -8.3662  |
|    | 32 | CGT | 0 | 0 | 1        | 2       | 0      | 0      | 0       | 0      | 0        |
| 33 | 33 | AAG | 0 | 3 | 0.596535 | 2.25847 | 0      | 1.3283 | 1.32834 | 0.495  | 14.1008  |
|    | 34 | CAG | 3 | 4 | 0.593786 | 1.88538 | 5.0523 | 2.1216 | -2.9307 | 0.9387 | -31.111  |
|    | 35 | ACC | 1 | 2 | 1        | 2       | 1      | 1      | 0       | 0.7407 | 0        |
|    | 36 | TAC | 0 | 0 | 0.580584 | 2       | 0      | 0      | 0       | 0      | 0        |
|    | 37 | AAG | 0 | 0 | 0.555986 | 2.27732 | 0      | 0      | 0       | 0      | 0        |
|    | 38 | GTA | 0 | 0 | 1        | 2       | 0      | 0      | 0       | 0      | 0        |
|    | 39 | GTA | 0 | 0 | 1        | 2       | 0      | 0      | 0       | 0      | 0        |
|    | 40 | CCT | 2 | 0 | 1        | 2       | 2      | 0      | -2      | 1      | -21.2308 |
|    | 41 | GTG | 0 | 0 | 1        | 2       | 0      | 0      | 0       | 0      | 0        |
|    | 42 | AGG | 0 | 0 | 0.862346 | 2.13765 | 0      | 0      | 0       | 0      | 0        |
|    | 43 | CCA | 0 | 0 | 1        | 2       | 0      | 0      | 0       | 0      | 0        |

|  |    |     |   |   |          |         |        |     |         |        |          |
|--|----|-----|---|---|----------|---------|--------|-----|---------|--------|----------|
|  | 44 | CCC | 0 | 0 | 1        | 2       | 0      | 0   | 0       | 0      | 0        |
|  | 45 | GCC | 0 | 0 | 1        | 2       | 0      | 0   | 0       | 0      | 0        |
|  | 46 | CTG | 1 | 0 | 1.57663  | 1.42337 | 0.6343 | 0   | -0.6343 | 1      | -6.73299 |
|  | 47 | TGT | 0 | 0 | 0.588602 | 2.25726 | 0      | 0   | 0       | 0      | 0        |
|  | 48 | GTG | 0 | 0 | 1        | 2       | 0      | 0   | 0       | 0      | 0        |
|  | 49 | TAC | 1 | 0 | 0.580638 | 2       | 1.7222 | 0   | -1.7222 | 1      | -18.2823 |
|  | 50 | CGG | 0 | 0 | 1.28935  | 1.71065 | 0      | 0   | 0       | 0      | 0        |
|  | 51 | TAT | 0 | 0 | 0.588602 | 2       | 0      | 0   | 0       | 0      | 0        |
|  | 52 | AAC | 0 | 0 | 0.580584 | 2.41942 | 0      | 0   | 0       | 0      | 0        |
|  | 53 | TGG | 0 | 0 | 0        | 1.88803 | 0      | 0   | 0       | 0      | 0        |
|  | 54 | CTC | 0 | 0 | 1        | 2       | 0      | 0   | 0       | 0      | 0        |
|  | 55 | AAT | 0 | 0 | 0.588602 | 2.4114  | 0      | 0   | 0       | 0      | 0        |
|  | 56 | TCG | 1 | 0 | 1        | 1.59582 | 1      | 0   | -1      | 1      | -10.6154 |
|  | 57 | GAC | 0 | 0 | 0.580584 | 2.41942 | 0      | 0   | 0       | 0      | 0        |
|  | 58 | AAG | 0 | 0 | 0.555986 | 2.27732 | 0      | 0   | 0       | 0      | 0        |
|  | 59 | ACC | 0 | 0 | 1        | 2       | 0      | 0   | 0       | 0      | 0        |
|  | 60 | AAT | 0 | 0 | 0.588602 | 2.4114  | 0      | 0   | 0       | 0      | 0        |
|  | 61 | ATC | 0 | 0 | 0.869933 | 2.13007 | 0      | 0   | 0       | 0      | 0        |
|  | 62 | GTG | 0 | 0 | 1        | 2       | 0      | 0   | 0       | 0      | 0        |
|  | 63 | GTG | 0 | 1 | 1        | 2       | 0      | 0.5 | 0.5     | 0.6667 | 5.3077   |
|  | 64 | GGT | 0 | 0 | 1        | 2       | 0      | 0   | 0       | 0      | 0        |
|  | 65 | AAC | 0 | 0 | 0.580584 | 2.41942 | 0      | 0   | 0       | 0      | 0        |
|  | 66 | ACC | 0 | 0 | 1        | 2       | 0      | 0   | 0       | 0      | 0        |
|  | 67 | CCT | 0 | 0 | 1        | 2       | 0      | 0   | 0       | 0      | 0        |
|  | 68 | CGG | 2 | 0 | 1.28541  | 1.69072 | 1.5559 | 0   | -1.5559 | 1      | -16.5168 |

|  |    |     |   |   |          |         |   |        |         |        |          |
|--|----|-----|---|---|----------|---------|---|--------|---------|--------|----------|
|  | 69 | ATT | 0 | 0 | 0.742743 | 2.25726 | 0 | 0      | 0       | 0      | 0        |
|  | 70 | GAT | 0 | 0 | 0.588602 | 2.4114  | 0 | 0      | 0       | 0      | 0        |
|  | 71 | CTG | 0 | 0 | 1.58058  | 1.41942 | 0 | 0      | 0       | 0      | 0        |
|  | 72 | ATT | 0 | 0 | 0.742743 | 2.25726 | 0 | 0      | 0       | 0      | 0        |
|  | 73 | ACC | 0 | 0 | 1        | 2       | 0 | 0      | 0       | 0      | 0        |
|  | 74 | TGC | 0 | 0 | 0.580584 | 2.13007 | 0 | 0      | 0       | 0      | 0        |
|  | 75 | TTT | 0 | 1 | 0.606629 | 2.3793  | 0 | 0.4203 | 0.42029 | 0.7968 | 4.46157  |
|  | 76 | GCA | 0 | 0 | 1        | 2       | 0 | 0      | 0       | 0      | 0        |
|  | 77 | GCG | 0 | 0 | 1        | 2       | 0 | 0      | 0       | 0      | 0        |
|  | 78 | GGT | 1 | 0 | 1        | 2       | 1 | 0      | -1      | 1      | -10.6154 |
|  | 79 | AAG | 0 | 0 | 0.555986 | 2.27732 | 0 | 0      | 0       | 0      | 0        |
|  | 80 | GCC | 0 | 0 | 1        | 2       | 0 | 0      | 0       | 0      | 0        |
|  | 81 | GAT | 0 | 0 | 0.588602 | 2.4114  | 0 | 0      | 0       | 0      | 0        |
|  | 82 | AAT | 0 | 0 | 0.588602 | 2.4114  | 0 | 0      | 0       | 0      | 0        |
|  | 83 | AAT | 0 | 0 | 0.588602 | 2.4114  | 0 | 0      | 0       | 0      | 0        |
|  | 84 | CGG | 0 | 0 | 1.28935  | 1.71065 | 0 | 0      | 0       | 0      | 0        |
|  | 85 | CAT | 0 | 0 | 0.588602 | 2.4114  | 0 | 0      | 0       | 0      | 0        |
|  | 86 | ACA | 0 | 0 | 1        | 2       | 0 | 0      | 0       | 0      | 0        |
|  | 87 | AAT | 0 | 0 | 0.588602 | 2.4114  | 0 | 0      | 0       | 0      | 0        |
|  | 88 | CAG | 0 | 0 | 0.555986 | 1.86343 | 0 | 0      | 0       | 0      | 0        |
|  | 89 | ACC | 0 | 0 | 1        | 2       | 0 | 0      | 0       | 0      | 0        |
|  | 90 | ATC | 0 | 2 | 0.872594 | 2.12741 | 0 | 0.9401 | 0.94011 | 0.5029 | 9.97967  |
|  | 91 | CTC | 0 | 0 | 1        | 2       | 0 | 0      | 0       | 0      | 0        |
|  | 92 | TAC | 0 | 0 | 0.580584 | 2       | 0 | 0      | 0       | 0      | 0        |
|  | 93 | AAG | 0 | 0 | 0.555986 | 2.27732 | 0 | 0      | 0       | 0      | 0        |

|  |     |     |   |   |          |         |        |   |         |   |          |
|--|-----|-----|---|---|----------|---------|--------|---|---------|---|----------|
|  | 94  | TTT | 0 | 0 | 0.588602 | 2.4114  | 0      | 0 | 0       | 0 | 0        |
|  | 95  | AAC | 0 | 0 | 0.580584 | 2.41942 | 0      | 0 | 0       | 0 | 0        |
|  | 96  | CTG | 3 | 0 | 1.58058  | 1.41942 | 1.898  | 0 | -1.898  | 1 | -20.1484 |
|  | 97  | CAG | 0 | 0 | 0.555986 | 1.86343 | 0      | 0 | 0       | 0 | 0        |
|  | 98  | GGG | 0 | 0 | 1        | 2       | 0      | 0 | 0       | 0 | 0        |
|  | 99  | ACC | 0 | 0 | 1        | 2       | 0      | 0 | 0       | 0 | 0        |
|  | 100 | TGC | 1 | 0 | 0.587663 | 2.24236 | 1.7017 | 0 | -1.7017 | 1 | -18.0638 |
|  | 101 | TAC | 0 | 0 | 0.580584 | 2       | 0      | 0 | 0       | 0 | 0        |
|  | 102 | GTG | 0 | 0 | 1        | 2       | 0      | 0 | 0       | 0 | 0        |
|  | 103 | TCG | 0 | 0 | 1        | 1.71065 | 0      | 0 | 0       | 0 | 0        |
|  | 104 | GAC | 0 | 0 | 0.580584 | 2.41942 | 0      | 0 | 0       | 0 | 0        |
|  | 105 | TCC | 2 | 0 | 1        | 2       | 2      | 0 | -2      | 1 | -21.2308 |
|  | 106 | TCC | 1 | 0 | 1        | 1.70477 | 1      | 0 | -1      | 1 | -10.6154 |
|  | 107 | TGT | 0 | 0 | 0.588602 | 2.25726 | 0      | 0 | 0       | 0 | 0        |
|  | 108 | ATG | 0 | 0 | 0        | 3       | 0      | 0 | 0       | 0 | 0        |
|  | 109 | TTC | 1 | 0 | 0.580858 | 2.41914 | 1.7216 | 0 | -1.7216 | 1 | -18.2754 |
|  | 110 | ATA | 0 | 0 | 0.473058 | 2.52694 | 0      | 0 | 0       | 0 | 0        |
|  | 111 | ACC | 0 | 0 | 1        | 2       | 0      | 0 | 0       | 0 | 0        |
|  | 112 | CCA | 0 | 0 | 1        | 2       | 0      | 0 | 0       | 0 | 0        |
|  | 113 | ATC | 0 | 0 | 0.869933 | 2.13007 | 0      | 0 | 0       | 0 | 0        |
|  | 114 | AGG | 0 | 0 | 0.862346 | 2.13765 | 0      | 0 | 0       | 0 | 0        |
|  | 115 | GTT | 0 | 0 | 1        | 2       | 0      | 0 | 0       | 0 | 0        |
|  | 116 | TAT | 0 | 0 | 0.588602 | 2       | 0      | 0 | 0       | 0 | 0        |
|  | 117 | CAC | 0 | 0 | 0.580584 | 2.41942 | 0      | 0 | 0       | 0 | 0        |
|  | 118 | TGG | 0 | 0 | 0        | 1.88803 | 0      | 0 | 0       | 0 | 0        |



|     |     |     |   |   |          |         |        |     |         |        |          |
|-----|-----|-----|---|---|----------|---------|--------|-----|---------|--------|----------|
|     | 119 | TTG | 1 | 0 | 1.15055  | 1.69742 | 0.8691 | 0   | -0.8691 | 1      | -9.22636 |
|     | 120 | GTC | 0 | 0 | 1        | 2       | 0      | 0   | 0       | 0      | 0        |
|     | 121 | TAT | 0 | 0 | 0.588602 | 2       | 0      | 0   | 0       | 0      | 0        |
|     | 122 | GAT | 0 | 0 | 0.588602 | 2.4114  | 0      | 0   | 0       | 0      | 0        |
|     | 123 | GCA | 1 | 0 | 1        | 2       | 1      | 0   | -1      | 1      | -10.6154 |
|     | 124 | GAG | 0 | 0 | 0.555986 | 2.15047 | 0      | 0   | 0       | 0      | 0        |
|     | 125 | CCG | 0 | 0 | 1        | 2       | 0      | 0   | 0       | 0      | 0        |
|     | 126 | AAA | 1 | 0 | 0.552584 | 2.28072 | 1.8097 | 0   | -1.8097 | 1      | -19.2105 |
|     | 127 | CAG | 0 | 0 | 0.555986 | 1.86343 | 0      | 0   | 0       | 0      | 0        |
|     | 128 | GCT | 0 | 0 | 1        | 2       | 0      | 0   | 0       | 0      | 0        |
|     | 129 | ACG | 0 | 0 | 1        | 2       | 0      | 0   | 0       | 0      | 0        |
|     | 130 | CCT | 0 | 0 | 1        | 2       | 0      | 0   | 0       | 0      | 0        |
|     | 131 | GAC | 0 | 0 | 0.580584 | 2.41942 | 0      | 0   | 0       | 0      | 0        |
|     | 132 | TCC | 0 | 0 | 1        | 2       | 0      | 0   | 0       | 0      | 0        |
|     | 133 | ACT | 0 | 0 | 1        | 2       | 0      | 0   | 0       | 0      | 0        |
|     | 134 | GAC | 0 | 0 | 0.580584 | 2.41942 | 0      | 0   | 0       | 0      | 0        |
|     | 135 | ATA | 2 | 0 | 0.822578 | 2.17742 | 2.4314 | 0   | -2.4314 | 1      | -25.8101 |
|     | 136 | TTT | 0 | 0 | 0.588602 | 2.4114  | 0      | 0   | 0       | 0      | 0        |
| 137 | 137 | ACG | 0 | 1 | 1        | 2       | 0      | 0.5 | 0.5     | 0.6667 | 5.3077   |
|     | 138 | ATG | 0 | 0 | 0        | 3       | 0      | 0   | 0       | 0      | 0        |
|     | 139 | CCG | 2 | 0 | 1        | 2       | 2      | 0   | -2      | 1      | -21.2308 |
|     | 140 | TGG | 0 | 0 | 0        | 1.88803 | 0      | 0   | 0       | 0      | 0        |
|     | 141 | AAT | 0 | 0 | 0.588602 | 2.4114  | 0      | 0   | 0       | 0      | 0        |
|     | 142 | CTC | 4 | 0 | 1.30208  | 1.69792 | 3.072  | 0   | -3.072  | 1      | -32.6106 |
|     | 143 | CTG | 0 | 0 | 1.58058  | 1.41942 | 0      | 0   | 0       | 0      | 0        |

|  |     |     |   |   |           |         |        |        |         |        |          |
|--|-----|-----|---|---|-----------|---------|--------|--------|---------|--------|----------|
|  | 144 | CCG | 0 | 0 | 1         | 2       | 0      | 0      | 0       | 0      | 0        |
|  | 145 | AGT | 0 | 0 | 0.588602  | 2.4114  | 0      | 0      | 0       | 0      | 0        |
|  | 146 | TCA | 0 | 0 | 1         | 1.58058 | 0      | 0      | 0       | 0      | 0        |
|  | 147 | TGG | 0 | 0 | 0         | 1.88803 | 0      | 0      | 0       | 0      | 0        |
|  | 148 | ACT | 0 | 0 | 1         | 2       | 0      | 0      | 0       | 0      | 0        |
|  | 149 | GTG | 0 | 0 | 1         | 2       | 0      | 0      | 0       | 0      | 0        |
|  | 150 | CAG | 1 | 0 | 0.554989  | 1.86443 | 1.8018 | 0      | -1.8018 | 1      | -19.1272 |
|  | 151 | AGG | 0 | 0 | 0.862346  | 2.13765 | 0      | 0      | 0       | 0      | 0        |
|  | 152 | GCT | 0 | 0 | 1         | 2       | 0      | 0      | 0       | 0      | 0        |
|  | 153 | TGG | 0 | 1 | 0.0136271 | 1.88955 | 0      | 0.5292 | 0.52923 | 0.9928 | 5.61794  |
|  | 154 | TCG | 0 | 0 | 1         | 1.71065 | 0      | 0      | 0       | 0      | 0        |
|  | 155 | CAT | 0 | 0 | 0.588602  | 2.4114  | 0      | 0      | 0       | 0      | 0        |
|  | 156 | CGG | 0 | 0 | 1.28935   | 1.71065 | 0      | 0      | 0       | 0      | 0        |
|  | 157 | TTC | 0 | 0 | 0.580584  | 2.41942 | 0      | 0      | 0       | 0      | 0        |
|  | 158 | GTG | 0 | 0 | 1         | 2       | 0      | 0      | 0       | 0      | 0        |
|  | 159 | GTG | 0 | 0 | 1         | 2       | 0      | 0      | 0       | 0      | 0        |
|  | 160 | AAG | 0 | 0 | 0.555986  | 2.27732 | 0      | 0      | 0       | 0      | 0        |
|  | 161 | AGG | 0 | 0 | 0.862346  | 2.13765 | 0      | 0      | 0       | 0      | 0        |
|  | 162 | AAG | 0 | 0 | 0.555986  | 2.27732 | 0      | 0      | 0       | 0      | 0        |
|  | 163 | TGG | 0 | 0 | 0         | 1.88803 | 0      | 0      | 0       | 0      | 0        |
|  | 164 | TGC | 0 | 0 | 0.580584  | 2.13007 | 0      | 0      | 0       | 0      | 0        |
|  | 165 | GTG | 0 | 0 | 1         | 2       | 0      | 0      | 0       | 0      | 0        |
|  | 166 | AAC | 0 | 0 | 0.580584  | 2.41942 | 0      | 0      | 0       | 0      | 0        |
|  | 167 | CTG | 0 | 0 | 1.58058   | 1.41942 | 0      | 0      | 0       | 0      | 0        |
|  | 168 | GTC | 0 | 0 | 1         | 2       | 0      | 0      | 0       | 0      | 0        |

|     |     |     |   |   |          |         |       |        |         |        |          |
|-----|-----|-----|---|---|----------|---------|-------|--------|---------|--------|----------|
|     | 169 | TCC | 0 | 0 | 1        | 2       | 0     | 0      | 0       | 0      | 0        |
|     | 170 | GAT | 0 | 0 | 0.588602 | 2.4114  | 0     | 0      | 0       | 0      | 0        |
|     | 171 | GGA | 0 | 0 | 1        | 1.70645 | 0     | 0      | 0       | 0      | 0        |
|     | 172 | AGG | 0 | 0 | 0.862346 | 2.13765 | 0     | 0      | 0       | 0      | 0        |
|     | 173 | AAG | 0 | 0 | 0.555986 | 2.27732 | 0     | 0      | 0       | 0      | 0        |
|     | 174 | GTT | 0 | 0 | 1        | 2       | 0     | 0      | 0       | 0      | 0        |
|     | 175 | GGA | 1 | 0 | 1        | 1.71046 | 1     | 0      | -1      | 1      | -10.6154 |
|     | 176 | TCC | 0 | 0 | 1        | 2       | 0     | 0      | 0       | 0      | 0        |
|     | 177 | AAG | 0 | 1 | 0.555986 | 2.2745  | 0     | 0.4397 | 0.43966 | 0.8036 | 4.66714  |
|     | 178 | ACG | 0 | 0 | 1        | 2       | 0     | 0      | 0       | 0      | 0        |
|     | 179 | GTG | 0 | 0 | 1        | 2       | 0     | 0      | 0       | 0      | 0        |
|     | 180 | GAC | 0 | 0 | 0.580584 | 2.41942 | 0     | 0      | 0       | 0      | 0        |
|     | 181 | TCC | 0 | 0 | 1        | 2       | 0     | 0      | 0       | 0      | 0        |
|     | 182 | CGC | 1 | 0 | 1        | 2       | 1     | 0      | -1      | 1      | -10.6154 |
|     | 183 | TAC | 0 | 0 | 0.580584 | 2       | 0     | 0      | 0       | 0      | 0        |
|     | 184 | AAC | 0 | 0 | 0.580584 | 2.41942 | 0     | 0      | 0       | 0      | 0        |
|     | 185 | TAC | 0 | 0 | 0.580584 | 2       | 0     | 0      | 0       | 0      | 0        |
|     | 186 | GTA | 0 | 0 | 1        | 2       | 0     | 0      | 0       | 0      | 0        |
|     | 187 | GTT | 1 | 0 | 1        | 2       | 1     | 0      | -1      | 1      | -10.6154 |
|     | 188 | GGG | 0 | 0 | 1        | 2       | 0     | 0      | 0       | 0      | 0        |
|     | 189 | AAG | 0 | 0 | 0.555986 | 2.27732 | 0     | 0      | 0       | 0      | 0        |
| 190 | 190 | AAT | 0 | 1 | 0.587483 | 2.4068  | 0     | 0.4155 | 0.41549 | 0.8038 | 4.4106   |
| 191 | 191 | ATT | 2 | 1 | 0.826118 | 2.17388 | 2.421 | 0.46   | -1.961  | 0.9791 | -20.8163 |
| 192 | 192 | GTT | 0 | 1 | 0.991171 | 2.00883 | 0     | 0.4978 | 0.4978  | 0.6696 | 5.28438  |
|     | 193 | GAC | 0 | 0 | 0.580584 | 2.41942 | 0     | 0      | 0       | 0      | 0        |

|  |     |     |   |   |          |         |        |   |         |   |          |
|--|-----|-----|---|---|----------|---------|--------|---|---------|---|----------|
|  | 194 | GCC | 0 | 0 | 1        | 2       | 0      | 0 | 0       | 0 | 0        |
|  | 195 | TCC | 0 | 0 | 1        | 2       | 0      | 0 | 0       | 0 | 0        |
|  | 196 | AAG | 0 | 0 | 0.555986 | 2.27732 | 0      | 0 | 0       | 0 | 0        |
|  | 197 | TTC | 1 | 0 | 0.580913 | 2.41909 | 1.7214 | 0 | -1.7214 | 1 | -18.2737 |
|  | 198 | GTC | 1 | 0 | 1        | 2       | 1      | 0 | -1      | 1 | -10.6154 |
|  | 199 | AAG | 1 | 0 | 0.55559  | 2.27771 | 1.7999 | 0 | -1.7999 | 1 | -19.1065 |
|  | 200 | GGT | 0 | 0 | 1        | 2       | 0      | 0 | 0       | 0 | 0        |
|  | 201 | TTG | 1 | 0 | 1.13823  | 1.65134 | 0.8786 | 0 | -0.8786 | 1 | -9.32621 |
|  | 202 | CGC | 0 | 0 | 1        | 2       | 0      | 0 | 0       | 0 | 0        |
|  | 203 | GTG | 0 | 0 | 1        | 2       | 0      | 0 | 0       | 0 | 0        |
|  | 204 | ACG | 0 | 0 | 1        | 2       | 0      | 0 | 0       | 0 | 0        |
|  | 205 | ACG | 0 | 0 | 1        | 2       | 0      | 0 | 0       | 0 | 0        |
|  | 206 | GAG | 0 | 0 | 0.555986 | 2.15047 | 0      | 0 | 0       | 0 | 0        |
|  | 207 | TGG | 0 | 0 | 0        | 1.88803 | 0      | 0 | 0       | 0 | 0        |
|  | 208 | ATG | 0 | 0 | 0        | 3       | 0      | 0 | 0       | 0 | 0        |
|  | 209 | AAC | 0 | 0 | 0.580584 | 2.41942 | 0      | 0 | 0       | 0 | 0        |
|  | 210 | ACG | 0 | 0 | 1        | 2       | 0      | 0 | 0       | 0 | 0        |
|  | 211 | GGT | 0 | 0 | 1        | 2       | 0      | 0 | 0       | 0 | 0        |
|  | 212 | GAC | 0 | 0 | 0.580584 | 2.41942 | 0      | 0 | 0       | 0 | 0        |
|  | 213 | GGC | 0 | 0 | 1        | 2       | 0      | 0 | 0       | 0 | 0        |
|  | 214 | AAG | 0 | 0 | 0.555986 | 2.27732 | 0      | 0 | 0       | 0 | 0        |
|  | 215 | ATA | 0 | 0 | 0.473058 | 2.52694 | 0      | 0 | 0       | 0 | 0        |
|  | 216 | GGC | 0 | 0 | 1        | 2       | 0      | 0 | 0       | 0 | 0        |
|  | 217 | GAT | 0 | 0 | 0.588602 | 2.4114  | 0      | 0 | 0       | 0 | 0        |
|  | 218 | ATT | 0 | 0 | 0.742743 | 2.25726 | 0      | 0 | 0       | 0 | 0        |

|     |     |     |   |   |          |         |        |        |         |        |          |
|-----|-----|-----|---|---|----------|---------|--------|--------|---------|--------|----------|
|     | 219 | AAG | 0 | 0 | 0.555986 | 2.27732 | 0      | 0      | 0       | 0      | 0        |
|     | 220 | AAG | 0 | 1 | 0.557102 | 2.2819  | 0      | 0.4382 | 0.43823 | 0.8038 | 4.652    |
|     | 221 | GGT | 0 | 0 | 1        | 2       | 0      | 0      | 0       | 0      | 0        |
|     | 222 | GCC | 0 | 0 | 1        | 2       | 0      | 0      | 0       | 0      | 0        |
|     | 223 | CTG | 0 | 0 | 1.58058  | 1.41942 | 0      | 0      | 0       | 0      | 0        |
|     | 224 | TAT | 1 | 0 | 0.585695 | 2       | 1.7074 | 0      | -1.7074 | 1      | -18.1245 |
|     | 225 | TTA | 1 | 0 | 1.52611  | 1.4257  | 0.6553 | 0      | -0.6553 | 1      | -6.95586 |
|     | 226 | GTA | 0 | 0 | 1        | 2       | 0      | 0      | 0       | 0      | 0        |
|     | 227 | ACC | 0 | 0 | 1        | 2       | 0      | 0      | 0       | 0      | 0        |
|     | 228 | TGT | 0 | 0 | 0.588602 | 2.25726 | 0      | 0      | 0       | 0      | 0        |
|     | 229 | ACT | 0 | 0 | 1        | 2       | 0      | 0      | 0       | 0      | 0        |
|     | 230 | CGT | 0 | 0 | 1        | 2       | 0      | 0      | 0       | 0      | 0        |
|     | 231 | GGA | 0 | 0 | 1        | 1.70645 | 0      | 0      | 0       | 0      | 0        |
|     | 232 | GGT | 1 | 0 | 1        | 1.93577 | 1      | 0      | -1      | 1      | -10.6154 |
| 233 | 233 | ATA | 1 | 1 | 0.828792 | 2.17121 | 1.2066 | 0.4606 | -0.746  | 0.9237 | -7.91911 |
|     | 234 | ACT | 0 | 1 | 1        | 2       | 0      | 0.5    | 0.5     | 0.6667 | 5.3077   |
|     | 235 | GGG | 2 | 0 | 1        | 1.80506 | 2      | 0      | -2      | 1      | -21.2308 |
|     | 236 | GAC | 0 | 0 | 0.580584 | 2.41942 | 0      | 0      | 0       | 0      | 0        |
|     | 237 | AGT | 0 | 0 | 0.588602 | 2.4114  | 0      | 0      | 0       | 0      | 0        |
|     | 238 | TCC | 0 | 1 | 1        | 2       | 0      | 0.5    | 0.5     | 0.6667 | 5.3077   |
|     | 239 | TCC | 0 | 0 | 1        | 2       | 0      | 0      | 0       | 0      | 0        |
|     | 240 | ATT | 0 | 0 | 0.742743 | 2.25726 | 0      | 0      | 0       | 0      | 0        |
|     | 241 | TCA | 0 | 0 | 1        | 1.58058 | 0      | 0      | 0       | 0      | 0        |
|     | 242 | TTC | 0 | 0 | 0.580584 | 2.41942 | 0      | 0      | 0       | 0      | 0        |
|     | 243 | GAA | 0 | 0 | 0.526942 | 2.17951 | 0      | 0      | 0       | 0      | 0        |

|  |     |     |   |   |          |         |   |        |         |        |         |
|--|-----|-----|---|---|----------|---------|---|--------|---------|--------|---------|
|  | 244 | GTT | 0 | 0 | 1        | 2       | 0 | 0      | 0       | 0      | 0       |
|  | 245 | GTA | 0 | 0 | 1        | 2       | 0 | 0      | 0       | 0      | 0       |
|  | 246 | TGT | 0 | 0 | 0.588602 | 2.25726 | 0 | 0      | 0       | 0      | 0       |
|  | 247 | GCC | 0 | 0 | 1        | 2       | 0 | 0      | 0       | 0      | 0       |
|  | 248 | TAT | 0 | 0 | 0.588602 | 2       | 0 | 0      | 0       | 0      | 0       |
|  | 249 | ACG | 0 | 0 | 1        | 2       | 0 | 0      | 0       | 0      | 0       |
|  | 250 | CAC | 0 | 0 | 0.580584 | 2.41942 | 0 | 0      | 0       | 0      | 0       |
|  | 251 | GCG | 0 | 0 | 1        | 2       | 0 | 0      | 0       | 0      | 0       |
|  | 252 | TGT | 0 | 1 | 0.568466 | 2.24463 | 0 | 0.4455 | 0.44551 | 0.7979 | 4.72926 |
|  | 253 | TAC | 0 | 0 | 0.580584 | 2       | 0 | 0      | 0       | 0      | 0       |
|  | 254 | TTC | 0 | 0 | 0.580584 | 2.41942 | 0 | 0      | 0       | 0      | 0       |
|  | 255 | AAA | 0 | 0 | 0.526942 | 2.30636 | 0 | 0      | 0       | 0      | 0       |
|  | 256 | TCC | 0 | 0 | 1        | 2       | 0 | 0      | 0       | 0      | 0       |
|  | 257 | ATT | 0 | 0 | 0.742743 | 2.25726 | 0 | 0      | 0       | 0      | 0       |
|  | 258 | GGG | 0 | 0 | 1        | 2       | 0 | 0      | 0       | 0      | 0       |
|  | 259 | ATT | 0 | 0 | 0.742743 | 2.25726 | 0 | 0      | 0       | 0      | 0       |
|  | 260 | CAA | 0 | 0 | 0.526942 | 1.89247 | 0 | 0      | 0       | 0      | 0       |

F.

| Coevolutionary sites of intra-protein of BDV-CP and BDV-Rep | Codon# | Triplet | Syn (s) | Nonsyn (n) | Syn sites (S) | Nonsyn sites (N) | $d_S$  | $d_N$  | $d_N - d_S$ | P-value | Normalized $d_N - d_S$ |
|-------------------------------------------------------------|--------|---------|---------|------------|---------------|------------------|--------|--------|-------------|---------|------------------------|
|                                                             | 1      | ATG     | 0       | 0          | 0             | 3                | 0      | 0      | 0           | 0       | 0                      |
|                                                             | 2      | GCT     | 1       | 0          | 1             | 2                | 1      | 0      | -1          | 1       | -7.0526                |
|                                                             | 3      | TCT     | 0       | 0          | 1             | 2                | 0      | 0      | 0           | 0       | 0                      |
|                                                             | 4      | TCA     | 0       | 1          | 1             | 1.65492          | 0      | 0.6043 | 0.60426     | 0.6233  | 4.26159                |
|                                                             | 5      | TCT     | 0       | 0          | 1             | 2                | 0      | 0      | 0           | 0       | 0                      |
|                                                             | 6      | GCA     | 0       | 0          | 1             | 2                | 0      | 0      | 0           | 0       | 0                      |
|                                                             | 7      | CCC     | 0       | 0          | 1             | 2                | 0      | 0      | 0           | 0       | 0                      |
|                                                             | 8      | AGG     | 0       | 0          | 0.729575      | 2.27042          | 0      | 0      | 0           | 0       | 0                      |
|                                                             | 9      | TTC     | 0       | 0          | 0.583919      | 2.41608          | 0      | 0      | 0           | 0       | 0                      |
|                                                             | 10     | CGT     | 0       | 0          | 1             | 2                | 0      | 0      | 0           | 0       | 0                      |
|                                                             | 11     | GTC     | 0       | 0          | 1             | 2                | 0      | 0      | 0           | 0       | 0                      |
|                                                             | 12     | TAT     | 0       | 0          | 0.368245      | 2                | 0      | 0      | 0           | 0       | 0                      |
|                                                             | 13     | TCG     | 1       | 0          | 1             | 1.95195          | 1      | 0      | -1          | 1       | -7.0526                |
|                                                             | 14     | AAA     | 0       | 0          | 0.378273      | 2.1926           | 0      | 0      | 0           | 0       | 0                      |
|                                                             | 15     | TAC     | 0       | 0          | 0.583919      | 2                | 0      | 0      | 0           | 0       | 0                      |
|                                                             | 16     | CTC     | 1       | 0          | 1.02577       | 1.97423          | 0.9749 | 0      | -0.9749     | 1       | -6.8754                |

|    |    |     |   |   |          |         |        |        |         |        |          |
|----|----|-----|---|---|----------|---------|--------|--------|---------|--------|----------|
|    | 17 | TTC | 0 | 0 | 0.583919 | 2.41608 | 0      | 0      | 0       | 0      | 0        |
|    | 18 | CTA | 0 | 0 | 1.58392  | 1.41608 | 0      | 0      | 0       | 0      | 0        |
|    | 19 | ACA | 0 | 0 | 1        | 2       | 0      | 0      | 0       | 0      | 0        |
|    | 20 | TAT | 0 | 0 | 0.368245 | 2       | 0      | 0      | 0       | 0      | 0        |
|    | 21 | CCT | 0 | 0 | 1        | 2       | 0      | 0      | 0       | 0      | 0        |
|    | 22 | CAA | 0 | 0 | 0.378273 | 2.03781 | 0      | 0      | 0       | 0      | 0        |
|    | 23 | TGC | 0 | 0 | 0.583919 | 2.13799 | 0      | 0      | 0       | 0      | 0        |
|    | 24 | ATC | 0 | 0 | 0.86201  | 2.13799 | 0      | 0      | 0       | 0      | 0        |
|    | 25 | CTT | 1 | 0 | 1.48303  | 1.51697 | 0.6743 | 0      | -0.6743 | 1      | -4.75553 |
|    | 26 | GAA | 1 | 0 | 0.509555 | 2.15723 | 1.9625 | 0      | -1.9625 | 1      | -13.8407 |
|    | 27 | CCA | 0 | 0 | 1        | 2       | 0      | 0      | 0       | 0      | 0        |
|    | 28 | CAG | 0 | 0 | 0.536975 | 1.87911 | 0      | 0      | 0       | 0      | 0        |
|    | 29 | TAC | 0 | 0 | 0.583919 | 2       | 0      | 0      | 0       | 0      | 0        |
|    | 30 | GCC | 0 | 0 | 1        | 2       | 0      | 0      | 0       | 0      | 0        |
|    | 31 | TTG | 0 | 0 | 0.90522  | 1.68641 | 0      | 0      | 0       | 0      | 0        |
| 32 | 32 | GAG | 0 | 1 | 0.575808 | 2.36662 | 0      | 0.4225 | 0.42254 | 0.8043 | 2.98003  |
|    | 33 | TCT | 0 | 0 | 1        | 2       | 0      | 0      | 0       | 0      | 0        |
|    | 34 | CTT | 0 | 0 | 1        | 2       | 0      | 0      | 0       | 0      | 0        |
|    | 35 | CGC | 0 | 0 | 1        | 2       | 0      | 0      | 0       | 0      | 0        |
|    | 36 | ACT | 0 | 0 | 1        | 2       | 0      | 0      | 0       | 0      | 0        |
|    | 37 | CTC | 0 | 0 | 1        | 2       | 0      | 0      | 0       | 0      | 0        |
|    | 38 | TTG | 0 | 0 | 0.90522  | 1.68641 | 0      | 0      | 0       | 0      | 0        |
|    | 39 | GCA | 1 | 0 | 1        | 2       | 1      | 0      | -1      | 1      | -7.0526  |
|    | 40 | AAA | 1 | 1 | 0.383013 | 2.19077 | 2.6109 | 0.4565 | -2.1544 | 0.9779 | -15.1942 |
|    | 41 | TAT | 1 | 0 | 0.371178 | 2       | 2.6941 | 0      | -2.6941 | 1      | -19.0006 |



|  |    |     |   |   |          |         |        |        |         |        |          |
|--|----|-----|---|---|----------|---------|--------|--------|---------|--------|----------|
|  | 42 | GAG | 1 | 0 | 0.405693 | 2.26109 | 2.4649 | 0      | -2.4649 | 1      | -17.3841 |
|  | 43 | CCT | 0 | 0 | 1        | 2       | 0      | 0      | 0       | 0      | 0        |
|  | 44 | CTC | 1 | 0 | 1.48303  | 1.51697 | 0.6743 | 0      | -0.6743 | 1      | -4.75553 |
|  | 45 | TAC | 0 | 0 | 0.583919 | 2       | 0      | 0      | 0       | 0      | 0        |
|  | 46 | ATC | 1 | 0 | 0.663241 | 2.33676 | 1.5078 | 0      | -1.5078 | 1      | -10.6335 |
|  | 47 | GCT | 0 | 0 | 1        | 2       | 0      | 0      | 0       | 0      | 0        |
|  | 48 | GCA | 1 | 0 | 1        | 2       | 1      | 0      | -1      | 1      | -7.0526  |
|  | 49 | GTT | 0 | 0 | 1        | 2       | 0      | 0      | 0       | 0      | 0        |
|  | 50 | CGA | 2 | 0 | 0.818443 | 2.08643 | 2.4437 | 0      | -2.4437 | 1      | -17.2342 |
|  | 51 | GAG | 1 | 0 | 0.405693 | 2.26109 | 2.4649 | 0      | -2.4649 | 1      | -17.3841 |
|  | 52 | CTT | 1 | 0 | 1        | 2       | 1      | 0      | -1      | 1      | -7.0526  |
|  | 53 | CAC | 0 | 0 | 0.583919 | 2.41608 | 0      | 0      | 0       | 0      | 0        |
|  | 54 | GAA | 0 | 0 | 0.378273 | 2.28851 | 0      | 0      | 0       | 0      | 0        |
|  | 55 | GAT | 0 | 1 | 0.368245 | 2.63175 | 0      | 0.38   | 0.37998 | 0.8773 | 2.67981  |
|  | 56 | GGA | 0 | 0 | 1        | 1.66678 | 0      | 0      | 0       | 0      | 0        |
|  | 57 | TCA | 0 | 0 | 1        | 1.58392 | 0      | 0      | 0       | 0      | 0        |
|  | 58 | CCA | 0 | 0 | 1        | 2       | 0      | 0      | 0       | 0      | 0        |
|  | 59 | CAT | 0 | 0 | 0.368245 | 2.63175 | 0      | 0      | 0       | 0      | 0        |
|  | 60 | CTG | 1 | 0 | 1.58392  | 1.41608 | 0.6313 | 0      | -0.6313 | 1      | -4.45263 |
|  | 61 | CAC | 0 | 0 | 0.583919 | 2.41608 | 0      | 0      | 0       | 0      | 0        |
|  | 62 | GTA | 0 | 0 | 1        | 2       | 0      | 0      | 0       | 0      | 0        |
|  | 63 | CTC | 0 | 1 | 0.997316 | 2.00268 | 0      | 0.4993 | 0.49933 | 0.6676 | 3.52158  |
|  | 64 | GTG | 0 | 1 | 0.980546 | 2.01945 | 0      | 0.4952 | 0.49518 | 0.6732 | 3.49233  |
|  | 65 | CAA | 0 | 0 | 0.378273 | 2.03781 | 0      | 0      | 0       | 0      | 0        |
|  | 66 | AAC | 0 | 1 | 0.583598 | 2.41347 | 0      | 0.4143 | 0.41434 | 0.8053 | 2.92218  |

|    |    |     |     |     |          |         |        |        |         |        |          |
|----|----|-----|-----|-----|----------|---------|--------|--------|---------|--------|----------|
|    | 67 | AAG | 0   | 0   | 0.536975 | 2.0339  | 0      | 0      | 0       | 0      | 0        |
|    | 68 | CTT | 0   | 0   | 1        | 2       | 0      | 0      | 0       | 0      | 0        |
|    | 69 | CGT | 0   | 0   | 1        | 2       | 0      | 0      | 0       | 0      | 0        |
|    | 70 | GCT | 0   | 0   | 1        | 2       | 0      | 0      | 0       | 0      | 0        |
|    | 71 | TCG | 1   | 0   | 1        | 1.95195 | 1      | 0      | -1      | 1      | -7.0526  |
|    | 72 | ATC | 0   | 0   | 0.86201  | 2.13799 | 0      | 0      | 0       | 0      | 0        |
|    | 73 | ACC | 0   | 0   | 1        | 2       | 0      | 0      | 0       | 0      | 0        |
|    | 74 | AAT | 0   | 0   | 0.368245 | 2.63175 | 0      | 0      | 0       | 0      | 0        |
|    | 75 | CCC | 0   | 0   | 1        | 2       | 0      | 0      | 0       | 0      | 0        |
|    | 76 | AAC | 1   | 0   | 0.405508 | 2.59449 | 2.466  | 0      | -2.466  | 1      | -17.392  |
|    | 77 | GCC | 1   | 0   | 1        | 2       | 1      | 0      | -1      | 1      | -7.0526  |
|    | 78 | CTA | 1   | 0   | 1.10089  | 1.89911 | 0.9084 | 0      | -0.9084 | 1      | -6.4063  |
|    | 79 | AAC | 0   | 0   | 0.583919 | 2.41608 | 0      | 0      | 0       | 0      | 0        |
| 80 | 80 | CTT | 0   | 1   | 0.815212 | 2.18479 | 0      | 0.4577 | 0.45771 | 0.7283 | 3.22805  |
| 81 | 81 | TGT | 0   | 1   | 0.89085  | 2.03859 | 0      | 0.4905 | 0.49053 | 0.6959 | 3.45954  |
|    | 82 | ATG | 0   | 0   | 0        | 3       | 0      | 0      | 0       | 0      | 0        |
| 83 | 83 | GAC | 0   | 1   | 0.583919 | 2.41608 | 0      | 0.4139 | 0.41389 | 0.8054 | 2.91903  |
|    | 84 | ACC | 2   | 0   | 1        | 2       | 2      | 0      | -2      | 1      | -14.1052 |
|    | 85 | TCT | 1   | 0   | 1        | 1.71255 | 1      | 0      | -1      | 1      | -7.0526  |
|    | 86 | CCA | 0   | 0   | 1        | 2       | 0      | 0      | 0       | 0      | 0        |
|    | 87 | TTT | 0   | 0   | 0.368245 | 2.63175 | 0      | 0      | 0       | 0      | 0        |
|    | 88 | TCT | 2   | 1   | 1        | 1.66051 | 2      | 0.6022 | -1.3978 | 0.9469 | -9.85795 |
| 89 | 89 | ATA | 0.5 | 1.5 | 0.431865 | 2.54464 | 1.1578 | 0.5895 | -0.5683 | 0.8549 | -4.00797 |
|    | 90 | TTC | 1   | 0   | 0.405508 | 2.59449 | 2.466  | 0      | -2.466  | 1      | -17.392  |
|    | 91 | CAT | 0   | 0   | 0.368245 | 2.63175 | 0      | 0      | 0       | 0      | 0        |

|  |     |     |   |   |          |         |        |        |         |        |          |
|--|-----|-----|---|---|----------|---------|--------|--------|---------|--------|----------|
|  | 92  | CCT | 0 | 0 | 1        | 2       | 0      | 0      | 0       | 0      | 0        |
|  | 93  | AAT | 1 | 0 | 0.546656 | 2.45334 | 1.8293 | 0      | -1.8293 | 1      | -12.9014 |
|  | 94  | ATT | 0 | 0 | 0.776618 | 2.22338 | 0      | 0      | 0       | 0      | 0        |
|  | 95  | CAA | 0 | 0 | 0.378273 | 2.03781 | 0      | 0      | 0       | 0      | 0        |
|  | 96  | GCT | 0 | 0 | 1        | 2       | 0      | 0      | 0       | 0      | 0        |
|  | 97  | GCC | 0 | 0 | 1        | 2       | 0      | 0      | 0       | 0      | 0        |
|  | 98  | AAA | 1 | 0 | 0.37935  | 2.19152 | 2.6361 | 0      | -2.6361 | 1      | -18.5913 |
|  | 99  | GAT | 1 | 0 | 0.546656 | 2.45334 | 1.8293 | 0      | -1.8293 | 1      | -12.9014 |
|  | 100 | TGC | 0 | 0 | 0.583919 | 2.13799 | 0      | 0      | 0       | 0      | 0        |
|  | 101 | AAC | 0 | 0 | 0.583919 | 2.41608 | 0      | 0      | 0       | 0      | 0        |
|  | 102 | CAA | 0 | 0 | 0.378273 | 2.03781 | 0      | 0      | 0       | 0      | 0        |
|  | 103 | GTT | 0 | 0 | 1        | 2       | 0      | 0      | 0       | 0      | 0        |
|  | 104 | CGT | 0 | 0 | 1        | 2       | 0      | 0      | 0       | 0      | 0        |
|  | 105 | GAT | 0 | 0 | 0.368245 | 2.63175 | 0      | 0      | 0       | 0      | 0        |
|  | 106 | TAC | 0 | 0 | 0.583919 | 2       | 0      | 0      | 0       | 0      | 0        |
|  | 107 | ATC | 0 | 0 | 0.86201  | 2.13799 | 0      | 0      | 0       | 0      | 0        |
|  | 108 | ACG | 0 | 2 | 0.176163 | 2.82384 | 0      | 0.7083 | 0.70826 | 0.886  | 4.99505  |
|  | 109 | AAG | 0 | 0 | 0.536975 | 2.0339  | 0      | 0      | 0       | 0      | 0        |
|  | 110 | GAG | 0 | 0 | 0.536975 | 2.12981 | 0      | 0      | 0       | 0      | 0        |
|  | 111 | GTT | 0 | 0 | 1        | 2       | 0      | 0      | 0       | 0      | 0        |
|  | 112 | GAC | 0 | 0 | 0.583919 | 2.41608 | 0      | 0      | 0       | 0      | 0        |
|  | 113 | TCC | 0 | 1 | 0.996737 | 2.00326 | 0      | 0.4992 | 0.49919 | 0.6678 | 3.52056  |
|  | 114 | GAT | 0 | 0 | 0.368245 | 2.63175 | 0      | 0      | 0       | 0      | 0        |
|  | 115 | GTC | 0 | 0 | 1        | 2       | 0      | 0      | 0       | 0      | 0        |
|  | 116 | AAC | 0 | 0 | 0.583919 | 2.41608 | 0      | 0      | 0       | 0      | 0        |

|     |     |     |        |         |          |         |        |        |         |        |          |
|-----|-----|-----|--------|---------|----------|---------|--------|--------|---------|--------|----------|
|     | 117 | ACG | 0      | 0       | 1        | 2       | 0      | 0      | 0       | 0      | 0        |
|     | 118 | GCT | 0      | 0       | 1        | 2       | 0      | 0      | 0       | 0      | 0        |
|     | 119 | GAG | 0      | 0       | 0.536975 | 2.12981 | 0      | 0      | 0       | 0      | 0        |
|     | 120 | TGG | 0      | 0       | 0        | 1.92605 | 0      | 0      | 0       | 0      | 0        |
|     | 121 | GGA | 0      | 0       | 1        | 1.66678 | 0      | 0      | 0       | 0      | 0        |
|     | 122 | ACA | 0      | 0       | 1        | 2       | 0      | 0      | 0       | 0      | 0        |
|     | 123 | TTC | 0      | 0       | 0.583919 | 2.41608 | 0      | 0      | 0       | 0      | 0        |
| 124 | 124 | ATA | 0      | 1       | 0.934644 | 2.06536 | 0      | 0.4842 | 0.48418 | 0.6885 | 3.41472  |
|     | 125 | GCA | 0      | 0       | 1        | 2       | 0      | 0      | 0       | 0      | 0        |
|     | 126 | GTT | 0      | 0       | 1        | 2       | 0      | 0      | 0       | 0      | 0        |
|     | 127 | ACC | 0      | 0       | 1        | 2       | 0      | 0      | 0       | 0      | 0        |
|     | 128 | ACT | 0      | 0       | 1        | 2       | 0      | 0      | 0       | 0      | 0        |
|     | 129 | CCG | 0      | 0       | 1        | 2       | 0      | 0      | 0       | 0      | 0        |
|     | 130 | GGT | 0      | 0       | 1        | 2       | 0      | 0      | 0       | 0      | 0        |
|     | 131 | CGT | 0      | 0       | 1        | 2       | 0      | 0      | 0       | 0      | 0        |
|     | 132 | AAA | 0      | 0       | 0.378273 | 2.1926  | 0      | 0      | 0       | 0      | 0        |
|     | 133 | GAC | 0      | 0       | 0.583919 | 2.41608 | 0      | 0      | 0       | 0      | 0        |
|     | 134 | CGA | 2      | 2       | 1.15903  | 1.38829 | 1.7256 | 1.4406 | -0.285  | 0.7518 | -2.00971 |
|     | 135 | GAC | 1      | 2       | 0.576916 | 2.39328 | 1.7334 | 0.8357 | -0.8977 | 0.9015 | -6.33099 |
|     | 136 | GCG | 0.6667 | 2.33333 | 0.9434   | 2.03708 | 0.7067 | 1.1454 | 0.43877 | 0.615  | 3.09447  |
|     | 137 | GAT | 0      | 2       | 0.404181 | 2.55988 | 0      | 0.7813 | 0.78129 | 0.7459 | 5.5101   |
|     | 138 | ATG | 0      | 2       | 0.137561 | 2.83921 | 0      | 0.7044 | 0.70442 | 0.9097 | 4.96801  |
|     | 139 | AAA | 0.25   | 2.75    | 0.412011 | 2.24176 | 0.6068 | 1.2267 | 0.61994 | 0.6859 | 4.37218  |
|     | 140 | CAG | 1.5    | 2.5     | 0.568313 | 1.97505 | 2.6394 | 1.2658 | -1.3736 | 0.8725 | -9.68746 |
|     | 141 | ATC | 1      | 1       | 0.785161 | 2.21484 | 1.2736 | 0.4515 | -0.8221 | 0.9315 | -5.79812 |

|  |     |     |      |      |          |         |        |        |         |        |           |
|--|-----|-----|------|------|----------|---------|--------|--------|---------|--------|-----------|
|  | 142 | ATT | 0    | 1    | 0.70693  | 2.29307 | 0      | 0.4361 | 0.4361  | 0.7644 | 3.07562   |
|  | 143 | GAG | 0.25 | 2.75 | 0.559143 | 2.17075 | 0.4471 | 1.2668 | 0.81973 | 0.5999 | 5.78124   |
|  | 144 | TCG | 0.5  | 1.5  | 0.922737 | 1.83922 | 0.5419 | 0.8156 | 0.2737  | 0.6659 | 1.93029   |
|  | 145 | AGT | 0    | 2    | 0.391475 | 2.5853  | 0      | 0.7736 | 0.77361 | 0.7543 | 5.45594   |
|  | 146 | ACC | 1    | 2    | 0.923984 | 2.07602 | 1.0823 | 0.9634 | -0.1189 | 0.7739 | -0.838455 |
|  | 147 | TCA | 1.5  | 1.5  | 0.922737 | 1.83768 | 1.6256 | 0.8162 | -0.8094 | 0.8511 | -5.70803  |
|  | 148 | AGA | 0.25 | 2.75 | 0.555312 | 2.10322 | 0.4502 | 1.3075 | 0.85732 | 0.5932 | 6.04635   |
|  | 149 | GAG | 0.25 | 2.75 | 0.559143 | 2.17075 | 0.4471 | 1.2668 | 0.81973 | 0.5999 | 5.78124   |
|  | 150 | GAA | 0.25 | 2.75 | 0.437679 | 2.28745 | 0.5712 | 1.2022 | 0.63102 | 0.6763 | 4.45033   |
|  | 151 | TTT | 0    | 0    | 0.368245 | 2.63175 | 0      | 0      | 0       | 0      | 0         |
|  | 152 | CTC | 1    | 1    | 0.90446  | 2.09554 | 1.1056 | 0.4772 | -0.6284 | 0.9091 | -4.43205  |
|  | 153 | AGC | 1    | 2    | 0.566638 | 2.41384 | 1.7648 | 0.8286 | -0.9362 | 0.9053 | -6.60292  |
|  | 154 | ATG | 0    | 0    | 0        | 3       | 0      | 0      | 0       | 0      | 0         |
|  | 155 | GTC | 0    | 0    | 1        | 2       | 0      | 0      | 0       | 0      | 0         |
|  | 156 | TGC | 0    | 0    | 0.583919 | 2.13799 | 0      | 0      | 0       | 0      | 0         |
|  | 157 | CAT | 0    | 0    | 0.368245 | 2.63175 | 0      | 0      | 0       | 0      | 0         |
|  | 158 | CGT | 0    | 0    | 1        | 2       | 0      | 0      | 0       | 0      | 0         |
|  | 159 | TTT | 0    | 0    | 0.368245 | 2.63175 | 0      | 0      | 0       | 0      | 0         |
|  | 160 | CCG | 1    | 0    | 1        | 2       | 1      | 0      | -1      | 1      | -7.0526   |
|  | 161 | TTT | 1    | 1    | 0.397156 | 2.60284 | 2.5179 | 0.3842 | -2.1337 | 0.9825 | -15.0482  |
|  | 162 | GAA | 0.5  | 1.5  | 0.406635 | 2.2784  | 1.2296 | 0.6584 | -0.5713 | 0.8486 | -4.0288   |
|  | 163 | TGG | 0    | 0    | 0        | 1.92605 | 0      | 0      | 0       | 0      | 0         |
|  | 164 | TCT | 1    | 0    | 1        | 2       | 1      | 0      | -1      | 1      | -7.0526   |
|  | 165 | ATC | 0    | 2    | 0.86957  | 2.13043 | 0      | 0.9388 | 0.93878 | 0.5043 | 6.62083   |
|  | 166 | CGT | 0    | 0    | 1        | 2       | 0      | 0      | 0       | 0      | 0         |

|     |     |     |   |   |          |         |        |        |         |        |          |
|-----|-----|-----|---|---|----------|---------|--------|--------|---------|--------|----------|
|     | 167 | CTG | 1 | 0 | 1.5363   | 1.4637  | 0.6509 | 0      | -0.6509 | 1      | -4.59064 |
|     | 168 | AAA | 0 | 0 | 0.378273 | 2.1926  | 0      | 0      | 0       | 0      | 0        |
|     | 169 | GAC | 0 | 1 | 0.589582 | 2.41042 | 0      | 0.4149 | 0.41487 | 0.8035 | 2.92588  |
|     | 170 | TTC | 0 | 1 | 0.586743 | 2.41326 | 0      | 0.4144 | 0.41438 | 0.8044 | 2.92244  |
|     | 171 | GAG | 1 | 0 | 0.405693 | 2.26109 | 2.4649 | 0      | -2.4649 | 1      | -17.3841 |
|     | 172 | TAC | 0 | 0 | 0.583919 | 2       | 0      | 0      | 0       | 0      | 0        |
|     | 173 | ACG | 1 | 0 | 1        | 2       | 1      | 0      | -1      | 1      | -7.0526  |
|     | 174 | GCA | 0 | 0 | 1        | 2       | 0      | 0      | 0       | 0      | 0        |
|     | 175 | CGC | 0 | 0 | 1        | 2       | 0      | 0      | 0       | 0      | 0        |
|     | 176 | CAC | 1 | 0 | 0.582455 | 2.41755 | 1.7169 | 0      | -1.7169 | 1      | -12.1084 |
|     | 177 | TTA | 1 | 0 | 1.43924  | 1.45161 | 0.6948 | 0      | -0.6948 | 1      | -4.90023 |
|     | 178 | TTC | 0 | 0 | 0.583919 | 2.41608 | 0      | 0      | 0       | 0      | 0        |
|     | 179 | CCA | 0 | 0 | 1        | 2       | 0      | 0      | 0       | 0      | 0        |
|     | 180 | GAC | 0 | 0 | 0.583919 | 2.41608 | 0      | 0      | 0       | 0      | 0        |
|     | 181 | CCA | 0 | 0 | 1        | 2       | 0      | 0      | 0       | 0      | 0        |
|     | 182 | GTT | 0 | 0 | 1        | 2       | 0      | 0      | 0       | 0      | 0        |
| 183 | 183 | AAC | 0 | 2 | 0.585899 | 2.4141  | 0      | 0.8285 | 0.82847 | 0.6475 | 5.84284  |
|     | 184 | ACT | 1 | 0 | 1        | 2       | 1      | 0      | -1      | 1      | -7.0526  |
|     | 185 | TAC | 0 | 0 | 0.583919 | 2       | 0      | 0      | 0       | 0      | 0        |
|     | 186 | ACA | 0 | 1 | 1        | 2       | 0      | 0.5    | 0.5     | 0.6667 | 3.5263   |
|     | 187 | CCT | 0 | 0 | 1        | 2       | 0      | 0      | 0       | 0      | 0        |
|     | 188 | GAG | 1 | 0 | 0.533193 | 2.13359 | 1.8755 | 0      | -1.8755 | 1      | -13.2271 |
|     | 189 | TTT | 0 | 0 | 0.368245 | 2.63175 | 0      | 0      | 0       | 0      | 0        |
|     | 190 | CCT | 1 | 0 | 1        | 2       | 1      | 0      | -1      | 1      | -7.0526  |
|     | 191 | ATC | 0 | 0 | 0.86201  | 2.13799 | 0      | 0      | 0       | 0      | 0        |

|  |     |     |   |   |            |         |       |        |         |        |          |
|--|-----|-----|---|---|------------|---------|-------|--------|---------|--------|----------|
|  | 192 | GAG | 0 | 0 | 0.536975   | 2.12981 | 0     | 0      | 0       | 0      | 0        |
|  | 193 | TCC | 0 | 0 | 1          | 2       | 0     | 0      | 0       | 0      | 0        |
|  | 194 | CTC | 0 | 0 | 1          | 2       | 0     | 0      | 0       | 0      | 0        |
|  | 195 | ATG | 0 | 1 | 0.00845381 | 2.99155 | 0     | 0.3343 | 0.33428 | 0.9972 | 2.35751  |
|  | 196 | TGT | 0 | 0 | 0.368245   | 2.22338 | 0     | 0      | 0       | 0      | 0        |
|  | 197 | CAT | 0 | 1 | 0.372557   | 2.62744 | 0     | 0.3806 | 0.3806  | 0.8758 | 2.68421  |
|  | 198 | GAG | 0 | 0 | 0.536975   | 2.12981 | 0     | 0      | 0       | 0      | 0        |
|  | 199 | ACC | 0 | 0 | 1          | 2       | 0     | 0      | 0       | 0      | 0        |
|  | 200 | ATT | 0 | 0 | 0.776618   | 2.22338 | 0     | 0      | 0       | 0      | 0        |
|  | 201 | GAA | 0 | 0 | 0.378273   | 2.28851 | 0     | 0      | 0       | 0      | 0        |
|  | 202 | AGC | 0 | 0 | 0.583919   | 2.41608 | 0     | 0      | 0       | 0      | 0        |
|  | 203 | TGG | 0 | 0 | 0          | 1.92605 | 0     | 0      | 0       | 0      | 0        |
|  | 204 | AAA | 0 | 0 | 0.378273   | 2.1926  | 0     | 0      | 0       | 0      | 0        |
|  | 205 | AAT | 0 | 1 | 0.385024   | 2.61498 | 0     | 0.3824 | 0.38241 | 0.8717 | 2.69701  |
|  | 206 | GAA | 0 | 3 | 0.376965   | 2.3333  | 0     | 1.2857 | 1.28573 | 0.6381 | 9.06777  |
|  | 207 | CAT | 0 | 0 | 0.368245   | 2.63175 | 0     | 0      | 0       | 0      | 0        |
|  | 208 | CTA | 2 | 0 | 1.45457    | 1.54543 | 1.375 | 0      | -1.375  | 1      | -9.69717 |
|  | 209 | TAC | 0 | 0 | 0.583919   | 2       | 0     | 0      | 0       | 0      | 0        |
|  | 210 | TCC | 0 | 0 | 1          | 2       | 0     | 0      | 0       | 0      | 0        |
|  | 211 | GAG | 0 | 0 | 0.536975   | 2.12981 | 0     | 0      | 0       | 0      | 0        |
|  | 212 | TCA | 0 | 0 | 1          | 1.58392 | 0     | 0      | 0       | 0      | 0        |
|  | 213 | CCG | 0 | 0 | 1          | 2       | 0     | 0      | 0       | 0      | 0        |
|  | 214 | GGA | 0 | 0 | 1          | 1.66678 | 0     | 0      | 0       | 0      | 0        |
|  | 215 | CGG | 1 | 0 | 1.27063    | 1.72937 | 0.787 | 0      | -0.787  | 1      | -5.5505  |
|  | 216 | CAT | 0 | 0 | 0.368245   | 2.63175 | 0     | 0      | 0       | 0      | 0        |

|  |     |     |   |   |          |         |        |        |         |       |          |
|--|-----|-----|---|---|----------|---------|--------|--------|---------|-------|----------|
|  | 217 | AAG | 0 | 0 | 0.536975 | 2.0339  | 0      | 0      | 0       | 0     | 0        |
|  | 218 | TCC | 0 | 0 | 1        | 2       | 0      | 0      | 0       | 0     | 0        |
|  | 219 | ATC | 1 | 2 | 0.843505 | 2.1451  | 1.1855 | 0.9324 | -0.2532 | 0.806 | -1.78551 |
|  | 220 | TAC | 0 | 0 | 0.583919 | 2       | 0      | 0      | 0       | 0     | 0        |
|  | 221 | ATC | 0 | 0 | 0.86201  | 2.13799 | 0      | 0      | 0       | 0     | 0        |
|  | 222 | TGC | 0 | 0 | 0.583919 | 2.13799 | 0      | 0      | 0       | 0     | 0        |
|  | 223 | GGT | 0 | 0 | 1        | 2       | 0      | 0      | 0       | 0     | 0        |
|  | 224 | CCG | 0 | 0 | 1        | 2       | 0      | 0      | 0       | 0     | 0        |
|  | 225 | ACA | 0 | 0 | 1        | 2       | 0      | 0      | 0       | 0     | 0        |
|  | 226 | AGA | 0 | 0 | 0.570874 | 2       | 0      | 0      | 0       | 0     | 0        |
|  | 227 | ACA | 0 | 0 | 1        | 2       | 0      | 0      | 0       | 0     | 0        |
|  | 228 | GGA | 0 | 0 | 1        | 1.66678 | 0      | 0      | 0       | 0     | 0        |
|  | 229 | AAG | 1 | 0 | 0.530454 | 2.04042 | 1.8852 | 0      | -1.8852 | 1     | -13.2954 |
|  | 230 | ACT | 0 | 0 | 1        | 2       | 0      | 0      | 0       | 0     | 0        |
|  | 231 | TCC | 0 | 0 | 1        | 2       | 0      | 0      | 0       | 0     | 0        |
|  | 232 | TGG | 0 | 0 | 0        | 1.92605 | 0      | 0      | 0       | 0     | 0        |
|  | 233 | GCA | 0 | 0 | 1        | 2       | 0      | 0      | 0       | 0     | 0        |
|  | 234 | AGA | 0 | 0 | 0.570874 | 2       | 0      | 0      | 0       | 0     | 0        |
|  | 235 | TCT | 0 | 0 | 1        | 2       | 0      | 0      | 0       | 0     | 0        |
|  | 236 | CTA | 0 | 0 | 1.58392  | 1.41608 | 0      | 0      | 0       | 0     | 0        |
|  | 237 | GGG | 0 | 0 | 1        | 2       | 0      | 0      | 0       | 0     | 0        |
|  | 238 | ATC | 0 | 0 | 0.86201  | 2.13799 | 0      | 0      | 0       | 0     | 0        |
|  | 239 | CAC | 0 | 0 | 0.583919 | 2.41608 | 0      | 0      | 0       | 0     | 0        |
|  | 240 | AAC | 0 | 0 | 0.583919 | 2.41608 | 0      | 0      | 0       | 0     | 0        |
|  | 241 | TAC | 0 | 0 | 0.583919 | 2       | 0      | 0      | 0       | 0     | 0        |



|  |     |     |   |   |          |         |   |        |         |        |         |
|--|-----|-----|---|---|----------|---------|---|--------|---------|--------|---------|
|  | 242 | TAC | 0 | 0 | 0.583919 | 2       | 0 | 0      | 0       | 0      | 0       |
|  | 243 | AAC | 0 | 0 | 0.583919 | 2.41608 | 0 | 0      | 0       | 0      | 0       |
|  | 244 | AGC | 0 | 1 | 0.586744 | 2.41326 | 0 | 0.4144 | 0.41438 | 0.8044 | 2.92244 |
|  | 245 | CTA | 0 | 0 | 1.58392  | 1.41608 | 0 | 0      | 0       | 0      | 0       |
|  | 246 | GCT | 1 | 1 | 1        | 2       | 1 | 0.5    | -0.5    | 0.8889 | -3.5263 |
|  | 247 | GAT | 0 | 0 | 0.368245 | 2.63175 | 0 | 0      | 0       | 0      | 0       |
|  | 248 | TTC | 0 | 1 | 0.583919 | 2.40617 | 0 | 0.4156 | 0.4156  | 0.8047 | 2.93106 |
|  | 249 | ACG | 0 | 0 | 1        | 2       | 0 | 0      | 0       | 0      | 0       |
|  | 250 | ACC | 0 | 0 | 1        | 2       | 0 | 0      | 0       | 0      | 0       |
|  | 251 | TAT | 0 | 0 | 0.368245 | 2       | 0 | 0      | 0       | 0      | 0       |
|  | 252 | GAC | 0 | 0 | 0.583919 | 2.41608 | 0 | 0      | 0       | 0      | 0       |
|  | 253 | GTC | 0 | 0 | 1        | 2       | 0 | 0      | 0       | 0      | 0       |
|  | 254 | AAC | 0 | 0 | 0.583919 | 2.41608 | 0 | 0      | 0       | 0      | 0       |
|  | 255 | GCC | 1 | 0 | 1        | 2       | 1 | 0      | -1      | 1      | -7.0526 |
|  | 256 | AAG | 0 | 0 | 0.536975 | 2.0339  | 0 | 0      | 0       | 0      | 0       |
|  | 257 | TAC | 0 | 0 | 0.583919 | 2       | 0 | 0      | 0       | 0      | 0       |
|  | 258 | AAC | 0 | 0 | 0.583919 | 2.41608 | 0 | 0      | 0       | 0      | 0       |
|  | 259 | ATA | 0 | 0 | 0.621727 | 2.37827 | 0 | 0      | 0       | 0      | 0       |
|  | 260 | ATT | 0 | 0 | 0.776618 | 2.22338 | 0 | 0      | 0       | 0      | 0       |
|  | 261 | GAC | 0 | 0 | 0.583919 | 2.41608 | 0 | 0      | 0       | 0      | 0       |
|  | 262 | GAC | 0 | 0 | 0.583919 | 2.41608 | 0 | 0      | 0       | 0      | 0       |
|  | 263 | ATT | 0 | 0 | 0.776618 | 2.22338 | 0 | 0      | 0       | 0      | 0       |
|  | 264 | CCA | 0 | 0 | 1        | 2       | 0 | 0      | 0       | 0      | 0       |
|  | 265 | TTC | 0 | 0 | 0.583919 | 2.41608 | 0 | 0      | 0       | 0      | 0       |
|  | 266 | AAG | 0 | 1 | 0.537453 | 2.0378  | 0 | 0.4907 | 0.49073 | 0.7913 | 3.4609  |

|  |     |     |   |   |          |         |        |        |         |        |          |
|--|-----|-----|---|---|----------|---------|--------|--------|---------|--------|----------|
|  | 267 | TTC | 0 | 1 | 0.588161 | 2.41184 | 0      | 0.4146 | 0.41462 | 0.8039 | 2.92416  |
|  | 268 | ACG | 0 | 0 | 1        | 2       | 0      | 0      | 0       | 0      | 0        |
|  | 269 | CCA | 0 | 0 | 1        | 2       | 0      | 0      | 0       | 0      | 0        |
|  | 270 | AAC | 0 | 0 | 0.583919 | 2.41608 | 0      | 0      | 0       | 0      | 0        |
|  | 271 | TGG | 0 | 0 | 0        | 1.92605 | 0      | 0      | 0       | 0      | 0        |
|  | 272 | AAG | 0 | 0 | 0.536975 | 2.0339  | 0      | 0      | 0       | 0      | 0        |
|  | 273 | TGC | 0 | 0 | 0.583919 | 2.13799 | 0      | 0      | 0       | 0      | 0        |
|  | 274 | TTC | 0 | 0 | 0.583919 | 2.41608 | 0      | 0      | 0       | 0      | 0        |
|  | 275 | GTC | 0 | 0 | 1        | 2       | 0      | 0      | 0       | 0      | 0        |
|  | 276 | GGG | 1 | 0 | 1        | 1.99206 | 1      | 0      | -1      | 1      | -7.0526  |
|  | 277 | GCT | 0 | 0 | 1        | 2       | 0      | 0      | 0       | 0      | 0        |
|  | 278 | CAG | 0 | 0 | 0.536975 | 1.87911 | 0      | 0      | 0       | 0      | 0        |
|  | 279 | CGT | 1 | 0 | 1.00663  | 1.97946 | 0.9934 | 0      | -0.9934 | 1      | -7.00617 |
|  | 280 | GAC | 0 | 0 | 0.583919 | 2.41608 | 0      | 0      | 0       | 0      | 0        |
|  | 281 | TTC | 0 | 0 | 0.583919 | 2.41608 | 0      | 0      | 0       | 0      | 0        |
|  | 282 | ACC | 0 | 1 | 1        | 2       | 0      | 0.5    | 0.5     | 0.6667 | 3.5263   |
|  | 283 | GTC | 0 | 0 | 1        | 2       | 0      | 0      | 0       | 0      | 0        |
|  | 284 | AAT | 0 | 0 | 0.368245 | 2.63175 | 0      | 0      | 0       | 0      | 0        |
|  | 285 | CCT | 0 | 0 | 1        | 2       | 0      | 0      | 0       | 0      | 0        |
|  | 286 | AAG | 0 | 0 | 0.536975 | 2.0339  | 0      | 0      | 0       | 0      | 0        |
|  | 287 | TAC | 0 | 0 | 0.583919 | 2       | 0      | 0      | 0       | 0      | 0        |
|  | 288 | GGG | 1 | 0 | 1        | 1.9966  | 1      | 0      | -1      | 1      | -7.0526  |
|  | 289 | AAG | 0 | 0 | 0.536975 | 2.0339  | 0      | 0      | 0       | 0      | 0        |
|  | 290 | CGA | 0 | 0 | 1.27809  | 1.13799 | 0      | 0      | 0       | 0      | 0        |
|  | 291 | AAA | 0 | 0 | 0.378273 | 2.1926  | 0      | 0      | 0       | 0      | 0        |

|  |     |     |   |   |          |         |   |        |         |        |         |
|--|-----|-----|---|---|----------|---------|---|--------|---------|--------|---------|
|  | 292 | ATG | 0 | 0 | 0        | 3       | 0 | 0      | 0       | 0      | 0       |
|  | 293 | ATA | 0 | 0 | 0.621727 | 2.37827 | 0 | 0      | 0       | 0      | 0       |
|  | 294 | CGG | 0 | 0 | 1.27809  | 1.72191 | 0 | 0      | 0       | 0      | 0       |
|  | 295 | GGT | 0 | 0 | 1        | 2       | 0 | 0      | 0       | 0      | 0       |
|  | 296 | GGT | 0 | 0 | 1        | 2       | 0 | 0      | 0       | 0      | 0       |
|  | 297 | ATA | 0 | 0 | 0.621727 | 2.37827 | 0 | 0      | 0       | 0      | 0       |
|  | 298 | CCT | 0 | 0 | 1        | 2       | 0 | 0      | 0       | 0      | 0       |
|  | 299 | TGC | 0 | 0 | 0.583919 | 2.13799 | 0 | 0      | 0       | 0      | 0       |
|  | 300 | ATC | 0 | 0 | 0.86201  | 2.13799 | 0 | 0      | 0       | 0      | 0       |
|  | 301 | ATT | 0 | 0 | 0.776618 | 2.22338 | 0 | 0      | 0       | 0      | 0       |
|  | 302 | TTA | 0 | 0 | 0.746518 | 1.62173 | 0 | 0      | 0       | 0      | 0       |
|  | 303 | GTT | 0 | 0 | 1        | 2       | 0 | 0      | 0       | 0      | 0       |
|  | 304 | AAC | 0 | 0 | 0.583919 | 2.41608 | 0 | 0      | 0       | 0      | 0       |
|  | 305 | CCA | 0 | 0 | 1        | 2       | 0 | 0      | 0       | 0      | 0       |
|  | 306 | GAC | 0 | 0 | 0.583919 | 2.41608 | 0 | 0      | 0       | 0      | 0       |
|  | 307 | GAA | 0 | 0 | 0.378273 | 2.28851 | 0 | 0      | 0       | 0      | 0       |
|  | 308 | GAT | 0 | 0 | 0.368245 | 2.63175 | 0 | 0      | 0       | 0      | 0       |
|  | 309 | TGG | 0 | 0 | 0        | 1.92605 | 0 | 0      | 0       | 0      | 0       |
|  | 310 | CTC | 0 | 0 | 1        | 2       | 0 | 0      | 0       | 0      | 0       |
|  | 311 | GAG | 0 | 1 | 0.536975 | 2.03497 | 0 | 0.4914 | 0.49141 | 0.7912 | 3.46571 |
|  | 312 | GAT | 0 | 0 | 0.368245 | 2.63175 | 0 | 0      | 0       | 0      | 0       |
|  | 313 | ATG | 0 | 0 | 0        | 3       | 0 | 0      | 0       | 0      | 0       |
|  | 314 | ACT | 0 | 0 | 1        | 2       | 0 | 0      | 0       | 0      | 0       |
|  | 315 | CCT | 0 | 0 | 1        | 2       | 0 | 0      | 0       | 0      | 0       |
|  | 316 | GAA | 0 | 0 | 0.378273 | 2.28851 | 0 | 0      | 0       | 0      | 0       |

|  |     |     |   |   |          |         |   |        |         |        |         |
|--|-----|-----|---|---|----------|---------|---|--------|---------|--------|---------|
|  | 317 | CAG | 0 | 0 | 0.536975 | 1.87911 | 0 | 0      | 0       | 0      | 0       |
|  | 318 | TCG | 0 | 0 | 1        | 1.72191 | 0 | 0      | 0       | 0      | 0       |
|  | 319 | GAT | 0 | 0 | 0.368245 | 2.63175 | 0 | 0      | 0       | 0      | 0       |
|  | 320 | TAC | 0 | 0 | 0.583919 | 2       | 0 | 0      | 0       | 0      | 0       |
|  | 321 | ATG | 0 | 0 | 0        | 3       | 0 | 0      | 0       | 0      | 0       |
|  | 322 | TAC | 0 | 0 | 0.583919 | 2       | 0 | 0      | 0       | 0      | 0       |
|  | 323 | TCT | 0 | 0 | 1        | 2       | 0 | 0      | 0       | 0      | 0       |
|  | 324 | AAC | 0 | 0 | 0.583919 | 2.41608 | 0 | 0      | 0       | 0      | 0       |
|  | 325 | GCT | 0 | 0 | 1        | 2       | 0 | 0      | 0       | 0      | 0       |
|  | 326 | GTG | 0 | 0 | 1        | 2       | 0 | 0      | 0       | 0      | 0       |
|  | 327 | ATA | 0 | 0 | 0.621727 | 2.37827 | 0 | 0      | 0       | 0      | 0       |
|  | 328 | CAT | 0 | 0 | 0.368245 | 2.63175 | 0 | 0      | 0       | 0      | 0       |
|  | 329 | TAT | 0 | 0 | 0.368245 | 2       | 0 | 0      | 0       | 0      | 0       |
|  | 330 | ATG | 0 | 0 | 0        | 3       | 0 | 0      | 0       | 0      | 0       |
|  | 331 | TAT | 0 | 0 | 0.368245 | 2       | 0 | 0      | 0       | 0      | 0       |
|  | 332 | GAG | 0 | 0 | 0.536975 | 2.12981 | 0 | 0      | 0       | 0      | 0       |
|  | 333 | GGT | 0 | 0 | 1        | 2       | 0 | 0      | 0       | 0      | 0       |
|  | 334 | GAA | 0 | 0 | 0.378273 | 2.28851 | 0 | 0      | 0       | 0      | 0       |
|  | 335 | TCA | 0 | 0 | 1        | 1.58392 | 0 | 0      | 0       | 0      | 0       |
|  | 336 | TTC | 0 | 0 | 0.583919 | 2.41608 | 0 | 0      | 0       | 0      | 0       |
|  | 337 | TTC | 0 | 0 | 0.583919 | 2.41608 | 0 | 0      | 0       | 0      | 0       |
|  | 338 | GCC | 0 | 0 | 1        | 2       | 0 | 0      | 0       | 0      | 0       |
|  | 339 | TTC | 0 | 0 | 0.583919 | 2.41608 | 0 | 0      | 0       | 0      | 0       |
|  | 340 | GGC | 0 | 0 | 1        | 2       | 0 | 0      | 0       | 0      | 0       |
|  | 341 | GAA | 0 | 1 | 0.380381 | 2.2864  | 0 | 0.4374 | 0.43737 | 0.8574 | 3.08458 |

|  |     |     |   |   |          |         |   |   |   |   |   |
|--|-----|-----|---|---|----------|---------|---|---|---|---|---|
|  | 342 | AAT | 0 | 0 | 0.368245 | 2.63175 | 0 | 0 | 0 | 0 | 0 |
|  | 343 | GTC | 0 | 0 | 1        | 2       | 0 | 0 | 0 | 0 | 0 |
|  | 344 | ACT | 0 | 0 | 1        | 2       | 0 | 0 | 0 | 0 | 0 |
|  | 345 | GCT | 0 | 0 | 1        | 2       | 0 | 0 | 0 | 0 | 0 |
|  | 346 | TCG | 0 | 0 | 1        | 1.72191 | 0 | 0 | 0 | 0 | 0 |
|  | 347 | CAG | 0 | 0 | 0.536975 | 1.87911 | 0 | 0 | 0 | 0 | 0 |

G.

| Coevolutionary sites of inter-protein of BDV-CP and BDV-Rep A | Coevolutionary sites of intra-protein | Codon# | Triplet | Syn (s) | Nonsyn (n) | Syn sites (S) | Nonsyn sites (N) | $d_S$  | $d_N$  | $d_N - d_S$ | P-value | Normalized $d_N - d_S$ |
|---------------------------------------------------------------|---------------------------------------|--------|---------|---------|------------|---------------|------------------|--------|--------|-------------|---------|------------------------|
|                                                               |                                       | 1      | ATG     | 0       | 0          | 0             | 3                | 0      | 0      | 0           | 0       | 0                      |
| 2                                                             |                                       | 2      | GCT     | 1       | 0          | 1             | 2                | 1      | 0      | -1          | 1       | -5.59999               |
|                                                               |                                       | 3      | TCT     | 0       | 0          | 1             | 2                | 0      | 0      | 0           | 0       | 0                      |
|                                                               |                                       | 4      | TCA     | 0       | 1          | 1             | 1.65767          | 0      | 0.6033 | 0.60326     | 0.6237  | 3.37823                |
|                                                               |                                       | 5      | TCT     | 0       | 0          | 1             | 2                | 0      | 0      | 0           | 0       | 0                      |
| 6                                                             |                                       | 6      | GCA     | 0       | 0          | 1             | 2                | 0      | 0      | 0           | 0       | 0                      |
|                                                               |                                       | 7      | CCC     | 0       | 0          | 1             | 2                | 0      | 0      | 0           | 0       | 0                      |
|                                                               |                                       | 8      | AGG     | 0       | 0          | 0.750493      | 2.24951          | 0      | 0      | 0           | 0       | 0                      |
|                                                               |                                       | 9      | TTC     | 0       | 0          | 0.582451      | 2.41755          | 0      | 0      | 0           | 0       | 0                      |
|                                                               |                                       | 10     | CGT     | 0       | 0          | 1             | 2                | 0      | 0      | 0           | 0       | 0                      |
|                                                               |                                       | 11     | GTC     | 0       | 0          | 1             | 2                | 0      | 0      | 0           | 0       | 0                      |
|                                                               |                                       | 12     | TAT     | 0       | 0          | 0.390699      | 2                | 0      | 0      | 0           | 0       | 0                      |
|                                                               |                                       | 13     | TCG     | 1       | 0          | 1             | 1.95333          | 1      | 0      | -1          | 1       | -5.59999               |
|                                                               |                                       | 14     | AAA     | 0       | 0          | 0.397158      | 2.20753          | 0      | 0      | 0           | 0       | 0                      |
|                                                               |                                       | 15     | TAC     | 0       | 0          | 0.582451      | 2                | 0      | 0      | 0           | 0       | 0                      |
|                                                               |                                       | 16     | CTC     | 1       | 0          | 1.02064       | 1.97936          | 0.9798 | 0      | -0.9798     | 1       | -5.48672               |
|                                                               |                                       | 17     | TTC     | 0       | 0          | 0.582451      | 2.41755          | 0      | 0      | 0           | 0       | 0                      |

|    |    |    |     |   |   |          |         |        |        |         |        |          |
|----|----|----|-----|---|---|----------|---------|--------|--------|---------|--------|----------|
|    |    | 18 | CTA | 0 | 0 | 1.58245  | 1.41755 | 0      | 0      | 0       | 0      | 0        |
|    |    | 19 | ACA | 0 | 0 | 1        | 2       | 0      | 0      | 0       | 0      | 0        |
|    |    | 20 | TAT | 0 | 0 | 0.390699 | 2       | 0      | 0      | 0       | 0      | 0        |
|    |    | 21 | CCT | 0 | 0 | 1        | 2       | 0      | 0      | 0       | 0      | 0        |
|    |    | 22 | CAA | 0 | 0 | 0.397158 | 2.02039 | 0      | 0      | 0       | 0      | 0        |
|    |    | 23 | TGC | 0 | 0 | 0.582451 | 2.13813 | 0      | 0      | 0       | 0      | 0        |
| 24 |    | 24 | ATC | 0 | 0 | 0.861875 | 2.13813 | 0      | 0      | 0       | 0      | 0        |
|    |    | 25 | CTT | 1 | 0 | 1.48517  | 1.51483 | 0.6733 | 0      | -0.6733 | 1      | -3.7706  |
|    |    | 26 | GAA | 1 | 0 | 0.518611 | 2.15601 | 1.9282 | 0      | -1.9282 | 1      | -10.7981 |
|    |    | 27 | CCA | 0 | 0 | 1        | 2       | 0      | 0      | 0       | 0      | 0        |
|    |    | 28 | CAG | 0 | 0 | 0.542963 | 1.87459 | 0      | 0      | 0       | 0      | 0        |
| 29 |    | 29 | TAC | 0 | 0 | 0.582451 | 2       | 0      | 0      | 0       | 0      | 0        |
|    |    | 30 | GCC | 0 | 0 | 1        | 2       | 0      | 0      | 0       | 0      | 0        |
|    |    | 31 | TTG | 0 | 0 | 0.933662 | 1.68601 | 0      | 0      | 0       | 0      | 0        |
| 32 | 32 | 32 | GAG | 0 | 1 | 0.575856 | 2.3698  | 0      | 0.422  | 0.42198 | 0.8045 | 2.36306  |
|    |    | 33 | TCT | 0 | 0 | 1        | 2       | 0      | 0      | 0       | 0      | 0        |
|    |    | 34 | CTT | 0 | 0 | 1        | 2       | 0      | 0      | 0       | 0      | 0        |
|    |    | 35 | CGC | 0 | 0 | 1        | 2       | 0      | 0      | 0       | 0      | 0        |
|    |    | 36 | ACT | 0 | 0 | 1        | 2       | 0      | 0      | 0       | 0      | 0        |
|    |    | 37 | CTC | 0 | 0 | 1        | 2       | 0      | 0      | 0       | 0      | 0        |
|    |    | 38 | TTG | 0 | 0 | 0.933662 | 1.68601 | 0      | 0      | 0       | 0      | 0        |
| 39 |    | 39 | GCA | 1 | 0 | 1        | 2       | 1      | 0      | -1      | 1      | -5.59999 |
|    |    | 40 | AAA | 1 | 1 | 0.401704 | 2.20579 | 2.4894 | 0.4534 | -2.036  | 0.9763 | -11.4018 |
|    |    | 41 | TAT | 1 | 0 | 0.393422 | 2       | 2.5418 | 0      | -2.5418 | 1      | -14.234  |
|    |    | 42 | GAG | 1 | 0 | 0.42151  | 2.25311 | 2.3724 | 0      | -2.3724 | 1      | -13.2855 |

|  |  |    |     |   |   |          |         |        |        |         |        |          |
|--|--|----|-----|---|---|----------|---------|--------|--------|---------|--------|----------|
|  |  | 43 | CCT | 0 | 0 | 1        | 2       | 0      | 0      | 0       | 0      | 0        |
|  |  | 44 | CTC | 1 | 0 | 1.48517  | 1.51483 | 0.6733 | 0      | -0.6733 | 1      | -3.7706  |
|  |  | 45 | TAC | 0 | 0 | 0.582451 | 2       | 0      | 0      | 0       | 0      | 0        |
|  |  | 46 | ATC | 1 | 0 | 0.646106 | 2.35389 | 1.5477 | 0      | -1.5477 | 1      | -8.66729 |
|  |  | 47 | GCT | 0 | 0 | 1        | 2       | 0      | 0      | 0       | 0      | 0        |
|  |  | 48 | GCA | 1 | 0 | 1        | 2       | 1      | 0      | -1      | 1      | -5.59999 |
|  |  | 49 | GTT | 0 | 0 | 1        | 2       | 0      | 0      | 0       | 0      | 0        |
|  |  | 50 | CGA | 2 | 0 | 0.833134 | 2.0769  | 2.4006 | 0      | -2.4006 | 1      | -13.4432 |
|  |  | 51 | GAG | 1 | 0 | 0.42151  | 2.25311 | 2.3724 | 0      | -2.3724 | 1      | -13.2855 |
|  |  | 52 | CTT | 1 | 0 | 1        | 2       | 1      | 0      | -1      | 1      | -5.59999 |
|  |  | 53 | CAC | 0 | 0 | 0.582451 | 2.41755 | 0      | 0      | 0       | 0      | 0        |
|  |  | 54 | GAA | 0 | 0 | 0.397158 | 2.27746 | 0      | 0      | 0       | 0      | 0        |
|  |  | 55 | GAT | 0 | 1 | 0.390699 | 2.6093  | 0      | 0.3832 | 0.38324 | 0.8698 | 2.14616  |
|  |  | 56 | GGA | 0 | 0 | 1        | 1.67462 | 0      | 0      | 0       | 0      | 0        |
|  |  | 57 | TCA | 0 | 0 | 1        | 1.58245 | 0      | 0      | 0       | 0      | 0        |
|  |  | 58 | CCA | 0 | 0 | 1        | 2       | 0      | 0      | 0       | 0      | 0        |
|  |  | 59 | CAT | 0 | 0 | 0.390699 | 2.6093  | 0      | 0      | 0       | 0      | 0        |
|  |  | 60 | CTG | 1 | 0 | 1.58245  | 1.41755 | 0.6319 | 0      | -0.6319 | 1      | -3.53881 |
|  |  | 61 | CAC | 0 | 0 | 0.582451 | 2.41755 | 0      | 0      | 0       | 0      | 0        |
|  |  | 62 | GTA | 0 | 0 | 1        | 2       | 0      | 0      | 0       | 0      | 0        |
|  |  | 63 | CTC | 0 | 1 | 0.997074 | 2.00293 | 0      | 0.4993 | 0.49927 | 0.6676 | 2.7959   |
|  |  | 64 | GTG | 0 | 1 | 0.978816 | 2.02118 | 0      | 0.4948 | 0.49476 | 0.6737 | 2.77065  |
|  |  | 65 | CAA | 0 | 0 | 0.397158 | 2.02039 | 0      | 0      | 0       | 0      | 0        |
|  |  | 66 | AAC | 0 | 1 | 0.582031 | 2.41376 | 0      | 0.4143 | 0.41429 | 0.8057 | 2.32002  |
|  |  | 67 | AAG | 0 | 0 | 0.542963 | 2.06172 | 0      | 0      | 0       | 0      | 0        |



|  |    |    |     |     |     |          |         |        |        |         |        |          |
|--|----|----|-----|-----|-----|----------|---------|--------|--------|---------|--------|----------|
|  |    | 68 | CTT | 0   | 0   | 1        | 2       | 0      | 0      | 0       | 0      | 0        |
|  |    | 69 | CGT | 0   | 0   | 1        | 2       | 0      | 0      | 0       | 0      | 0        |
|  |    | 70 | GCT | 0   | 0   | 1        | 2       | 0      | 0      | 0       | 0      | 0        |
|  |    | 71 | TCG | 1   | 0   | 1        | 1.95333 | 1      | 0      | -1      | 1      | -5.59999 |
|  |    | 72 | ATC | 0   | 0   | 0.861875 | 2.13813 | 0      | 0      | 0       | 0      | 0        |
|  |    | 73 | ACC | 0   | 0   | 1        | 2       | 0      | 0      | 0       | 0      | 0        |
|  |    | 74 | AAT | 0   | 0   | 0.390699 | 2.6093  | 0      | 0      | 0       | 0      | 0        |
|  |    | 75 | CCC | 0   | 0   | 1        | 2       | 0      | 0      | 0       | 0      | 0        |
|  |    | 76 | AAC | 1   | 0   | 0.422726 | 2.57727 | 2.3656 | 0      | -2.3656 | 1      | -13.2473 |
|  |    | 77 | GCC | 1   | 0   | 1        | 2       | 1      | 0      | -1      | 1      | -5.59999 |
|  |    | 78 | CTA | 1   | 0   | 1.09728  | 1.90272 | 0.9113 | 0      | -0.9113 | 1      | -5.10351 |
|  |    | 79 | AAC | 0   | 0   | 0.582451 | 2.41755 | 0      | 0      | 0       | 0      | 0        |
|  | 80 | 80 | CTT | 0   | 1   | 0.809266 | 2.19073 | 0      | 0.4565 | 0.45647 | 0.7302 | 2.55621  |
|  | 81 | 81 | TGT | 0   | 1   | 0.898235 | 2.03824 | 0      | 0.4906 | 0.49062 | 0.6941 | 2.74746  |
|  |    | 82 | ATG | 0   | 0   | 0        | 3       | 0      | 0      | 0       | 0      | 0        |
|  | 83 | 83 | GAC | 0   | 1   | 0.582451 | 2.41755 | 0      | 0.4136 | 0.41364 | 0.8059 | 2.31639  |
|  |    | 84 | ACC | 2   | 0   | 1        | 2       | 2      | 0      | -2      | 1      | -11.2    |
|  |    | 85 | TCT | 1   | 0   | 1        | 1.71167 | 1      | 0      | -1      | 1      | -5.59999 |
|  |    | 86 | CCA | 0   | 0   | 1        | 2       | 0      | 0      | 0       | 0      | 0        |
|  |    | 87 | TTT | 0   | 0   | 0.390699 | 2.6093  | 0      | 0      | 0       | 0      | 0        |
|  |    | 88 | TCT | 2   | 1   | 1        | 1.65711 | 2      | 0.6035 | -1.3965 | 0.9467 | -7.8206  |
|  | 89 | 89 | ATA | 0.5 | 1.5 | 0.448238 | 2.52794 | 1.1155 | 0.5934 | -0.5221 | 0.8494 | -2.92381 |
|  |    | 90 | TTC | 1   | 0   | 0.422726 | 2.57727 | 2.3656 | 0      | -2.3656 | 1      | -13.2473 |
|  |    | 91 | CAT | 0   | 0   | 0.390699 | 2.6093  | 0      | 0      | 0       | 0      | 0        |
|  |    | 92 | CCT | 0   | 0   | 1        | 2       | 0      | 0      | 0       | 0      | 0        |

|     |  |     |     |   |   |          |         |        |        |         |        |          |
|-----|--|-----|-----|---|---|----------|---------|--------|--------|---------|--------|----------|
|     |  | 93  | AAT | 1 | 0 | 0.550425 | 2.44958 | 1.8168 | 0      | -1.8168 | 1      | -10.1739 |
|     |  | 94  | ATT | 0 | 0 | 0.771022 | 2.22898 | 0      | 0      | 0       | 0      | 0        |
|     |  | 95  | CAA | 0 | 0 | 0.397158 | 2.02039 | 0      | 0      | 0       | 0      | 0        |
|     |  | 96  | GCT | 0 | 0 | 1        | 2       | 0      | 0      | 0       | 0      | 0        |
|     |  | 97  | GCC | 0 | 0 | 1        | 2       | 0      | 0      | 0       | 0      | 0        |
|     |  | 98  | AAA | 1 | 0 | 0.398709 | 2.20598 | 2.5081 | 0      | -2.5081 | 1      | -14.0453 |
|     |  | 99  | GAT | 1 | 0 | 0.550425 | 2.44958 | 1.8168 | 0      | -1.8168 | 1      | -10.1739 |
|     |  | 100 | TGC | 0 | 0 | 0.582451 | 2.13813 | 0      | 0      | 0       | 0      | 0        |
|     |  | 101 | AAC | 0 | 0 | 0.582451 | 2.41755 | 0      | 0      | 0       | 0      | 0        |
|     |  | 102 | CAA | 0 | 0 | 0.397158 | 2.02039 | 0      | 0      | 0       | 0      | 0        |
|     |  | 103 | GTT | 0 | 0 | 1        | 2       | 0      | 0      | 0       | 0      | 0        |
|     |  | 104 | CGT | 0 | 0 | 1        | 2       | 0      | 0      | 0       | 0      | 0        |
|     |  | 105 | GAT | 0 | 0 | 0.390699 | 2.6093  | 0      | 0      | 0       | 0      | 0        |
|     |  | 106 | TAC | 0 | 0 | 0.582451 | 2       | 0      | 0      | 0       | 0      | 0        |
|     |  | 107 | ATC | 0 | 0 | 0.861875 | 2.13813 | 0      | 0      | 0       | 0      | 0        |
| 108 |  | 108 | ACG | 0 | 2 | 0.170562 | 2.82944 | 0      | 0.7069 | 0.70685 | 0.8895 | 3.95837  |
| 109 |  | 109 | AAG | 0 | 0 | 0.542963 | 2.06172 | 0      | 0      | 0       | 0      | 0        |
|     |  | 110 | GAG | 0 | 0 | 0.542963 | 2.13166 | 0      | 0      | 0       | 0      | 0        |
|     |  | 111 | GTT | 0 | 0 | 1        | 2       | 0      | 0      | 0       | 0      | 0        |
|     |  | 112 | GAC | 0 | 0 | 0.582451 | 2.41755 | 0      | 0      | 0       | 0      | 0        |
|     |  | 113 | TCC | 0 | 1 | 0.996906 | 2.00309 | 0      | 0.4992 | 0.49923 | 0.6677 | 2.79567  |
|     |  | 114 | GAT | 0 | 0 | 0.390699 | 2.6093  | 0      | 0      | 0       | 0      | 0        |
|     |  | 115 | GTC | 0 | 0 | 1        | 2       | 0      | 0      | 0       | 0      | 0        |
|     |  | 116 | AAC | 0 | 0 | 0.582451 | 2.41755 | 0      | 0      | 0       | 0      | 0        |
|     |  | 117 | ACG | 0 | 0 | 1        | 2       | 0      | 0      | 0       | 0      | 0        |

|     |     |     |     |        |         |          |         |        |        |         |        |          |
|-----|-----|-----|-----|--------|---------|----------|---------|--------|--------|---------|--------|----------|
|     |     | 118 | GCT | 0      | 0       | 1        | 2       | 0      | 0      | 0       | 0      | 0        |
|     |     | 119 | GAG | 0      | 0       | 0.542963 | 2.13166 | 0      | 0      | 0       | 0      | 0        |
|     |     | 120 | TGG | 0      | 0       | 0        | 1.91407 | 0      | 0      | 0       | 0      | 0        |
|     |     | 121 | GGA | 0      | 0       | 1        | 1.67462 | 0      | 0      | 0       | 0      | 0        |
|     |     | 122 | ACA | 0      | 0       | 1        | 2       | 0      | 0      | 0       | 0      | 0        |
|     |     | 123 | TTC | 0      | 0       | 0.582451 | 2.41755 | 0      | 0      | 0       | 0      | 0        |
|     | 124 | 124 | ATA | 0      | 1       | 0.933667 | 2.06633 | 0      | 0.4839 | 0.48395 | 0.6888 | 2.71011  |
|     |     | 125 | GCA | 0      | 0       | 1        | 2       | 0      | 0      | 0       | 0      | 0        |
|     |     | 126 | GTT | 0      | 0       | 1        | 2       | 0      | 0      | 0       | 0      | 0        |
|     |     | 127 | ACC | 0      | 0       | 1        | 2       | 0      | 0      | 0       | 0      | 0        |
|     |     | 128 | ACT | 0      | 0       | 1        | 2       | 0      | 0      | 0       | 0      | 0        |
|     |     | 129 | CCG | 0      | 0       | 1        | 2       | 0      | 0      | 0       | 0      | 0        |
|     |     | 130 | GGT | 0      | 0       | 1        | 2       | 0      | 0      | 0       | 0      | 0        |
|     |     | 131 | CGT | 0      | 0       | 1        | 2       | 0      | 0      | 0       | 0      | 0        |
| 132 |     | 132 | AAA | 0      | 0       | 0.397158 | 2.20753 | 0      | 0      | 0       | 0      | 0        |
|     |     | 133 | GAC | 0      | 0       | 0.582451 | 2.41755 | 0      | 0      | 0       | 0      | 0        |
|     |     | 134 | CGA | 2      | 2       | 1.15677  | 1.4     | 1.729  | 1.4286 | -0.3004 | 0.7553 | -1.68213 |
|     |     | 135 | GAC | 1      | 2       | 0.578738 | 2.39043 | 1.7279 | 0.8367 | -0.8912 | 0.9008 | -4.99086 |
|     |     | 136 | GCG | 0.6667 | 2.33333 | 0.943128 | 2.03706 | 0.7069 | 1.1454 | 0.43857 | 0.6151 | 2.456    |
|     |     | 137 | GAT | 0      | 2       | 0.427286 | 2.53613 | 0      | 0.7886 | 0.7886  | 0.7324 | 4.41617  |
|     |     | 138 | ATG | 0      | 2       | 0.149283 | 2.82788 | 0      | 0.7072 | 0.70724 | 0.9022 | 3.96055  |
|     |     | 139 | AAA | 0.25   | 2.75    | 0.431038 | 2.25303 | 0.58   | 1.2206 | 0.64058 | 0.6763 | 3.58726  |
|     |     | 140 | CAG | 2.5    | 2.5     | 0.587342 | 1.96531 | 4.2565 | 1.2721 | -2.9844 | 0.9525 | -16.7126 |
|     |     | 141 | ATC | 1      | 1       | 0.783055 | 2.21694 | 1.2771 | 0.4511 | -0.826  | 0.9319 | -4.62547 |
|     |     | 142 | ATT | 0      | 1       | 0.70251  | 2.29749 | 0      | 0.4353 | 0.43526 | 0.7658 | 2.43744  |

|     |  |     |     |      |      |          |         |        |        |         |        |          |
|-----|--|-----|-----|------|------|----------|---------|--------|--------|---------|--------|----------|
|     |  | 143 | GAG | 0.25 | 2.75 | 0.568926 | 2.17133 | 0.4394 | 1.2665 | 0.82708 | 0.5953 | 4.63163  |
|     |  | 144 | TCG | 0.5  | 1.5  | 0.922843 | 1.84201 | 0.5418 | 0.8143 | 0.27252 | 0.6662 | 1.52613  |
|     |  | 145 | AGT | 0    | 2    | 0.413537 | 2.56363 | 0      | 0.7801 | 0.78015 | 0.7415 | 4.3688   |
| 146 |  | 146 | ACC | 1    | 2    | 0.921562 | 2.07844 | 1.0851 | 0.9623 | -0.1229 | 0.7749 | -0.68798 |
|     |  | 147 | TCA | 1.5  | 1.5  | 0.922843 | 1.8415  | 1.6254 | 0.8146 | -0.8109 | 0.8514 | -4.54081 |
|     |  | 148 | AGA | 0.25 | 2.75 | 0.582491 | 2.10673 | 0.4292 | 1.3053 | 0.87615 | 0.5805 | 4.90642  |
|     |  | 149 | GAG | 0.25 | 2.75 | 0.568926 | 2.17133 | 0.4394 | 1.2665 | 0.82708 | 0.5953 | 4.63163  |
|     |  | 150 | GAA | 0.25 | 2.75 | 0.459236 | 2.27587 | 0.5444 | 1.2083 | 0.66395 | 0.6633 | 3.7181   |
|     |  | 151 | TTT | 0    | 0    | 0.390699 | 2.6093  | 0      | 0      | 0       | 0      | 0        |
|     |  | 152 | CTC | 1    | 1    | 0.901754 | 2.09825 | 1.109  | 0.4766 | -0.6324 | 0.9096 | -3.54122 |
|     |  | 153 | AGC | 1    | 2    | 0.567717 | 2.41248 | 1.7614 | 0.829  | -0.9324 | 0.905  | -5.22153 |
|     |  | 154 | ATG | 0    | 0    | 0        | 3       | 0      | 0      | 0       | 0      | 0        |
|     |  | 155 | GTC | 0    | 0    | 1        | 2       | 0      | 0      | 0       | 0      | 0        |
|     |  | 156 | TGC | 0    | 0    | 0.582451 | 2.13813 | 0      | 0      | 0       | 0      | 0        |
| 157 |  | 157 | CAT | 0    | 0    | 0.390699 | 2.6093  | 0      | 0      | 0       | 0      | 0        |
|     |  | 158 | CGT | 0    | 0    | 1        | 2       | 0      | 0      | 0       | 0      | 0        |
|     |  | 159 | TTT | 0    | 0    | 0.390699 | 2.6093  | 0      | 0      | 0       | 0      | 0        |
|     |  | 160 | CCG | 1    | 0    | 1        | 2       | 1      | 0      | -1      | 1      | -5.59999 |
|     |  | 161 | TTT | 1    | 1    | 0.419618 | 2.58038 | 2.3831 | 0.3875 | -1.9956 | 0.9804 | -11.1752 |
|     |  | 162 | GAA | 0.5  | 1.5  | 0.425707 | 2.26755 | 1.1745 | 0.6615 | -0.513  | 0.8419 | -2.87285 |
|     |  | 163 | TGG | 0    | 0    | 0        | 1.91407 | 0      | 0      | 0       | 0      | 0        |
|     |  | 164 | TCT | 1    | 0    | 1        | 2       | 1      | 0      | -1      | 1      | -5.59999 |
|     |  | 165 | ATC | 0    | 2    | 0.869786 | 2.13021 | 0      | 0.9389 | 0.93887 | 0.5042 | 5.25767  |
|     |  | 166 | CGT | 0    | 0    | 1        | 2       | 0      | 0      | 0       | 0      | 0        |
|     |  | 167 | CTG | 1    | 0    | 1.54319  | 1.45681 | 0.648  | 0      | -0.648  | 1      | -3.62884 |

|     |     |     |     |   |   |          |         |        |        |         |        |          |
|-----|-----|-----|-----|---|---|----------|---------|--------|--------|---------|--------|----------|
|     |     | 168 | AAA | 0 | 0 | 0.397158 | 2.20753 | 0      | 0      | 0       | 0      | 0        |
|     |     | 169 | GAC | 0 | 1 | 0.586898 | 2.4131  | 0      | 0.4144 | 0.4144  | 0.8044 | 2.32066  |
|     |     | 170 | TTC | 0 | 1 | 0.586891 | 2.41311 | 0      | 0.4144 | 0.4144  | 0.8044 | 2.32065  |
|     |     | 171 | GAG | 1 | 0 | 0.42151  | 2.25311 | 2.3724 | 0      | -2.3724 | 1      | -13.2855 |
|     |     | 172 | TAC | 0 | 0 | 0.582451 | 2       | 0      | 0      | 0       | 0      | 0        |
|     |     | 173 | ACG | 1 | 0 | 1        | 2       | 1      | 0      | -1      | 1      | -5.59999 |
|     |     | 174 | GCA | 0 | 0 | 1        | 2       | 0      | 0      | 0       | 0      | 0        |
|     |     | 175 | CGC | 0 | 0 | 1        | 2       | 0      | 0      | 0       | 0      | 0        |
|     |     | 176 | CAC | 1 | 0 | 0.581773 | 2.41823 | 1.7189 | 0      | -1.7189 | 1      | -9.62573 |
|     |     | 177 | TTA | 1 | 0 | 1.44974  | 1.4485  | 0.6898 | 0      | -0.6898 | 1      | -3.86276 |
| 178 |     | 178 | TTC | 0 | 0 | 0.582451 | 2.41755 | 0      | 0      | 0       | 0      | 0        |
|     |     | 179 | CCA | 0 | 0 | 1        | 2       | 0      | 0      | 0       | 0      | 0        |
|     |     | 180 | GAC | 0 | 0 | 0.582451 | 2.41755 | 0      | 0      | 0       | 0      | 0        |
|     |     | 181 | CCA | 0 | 0 | 1        | 2       | 0      | 0      | 0       | 0      | 0        |
|     |     | 182 | GTT | 0 | 0 | 1        | 2       | 0      | 0      | 0       | 0      | 0        |
|     | 183 | 183 | AAC | 0 | 2 | 0.584838 | 2.41516 | 0      | 0.8281 | 0.8281  | 0.6481 | 4.63736  |
|     |     | 184 | ACT | 1 | 0 | 1        | 2       | 1      | 0      | -1      | 1      | -5.59999 |
|     |     | 185 | TAC | 0 | 0 | 0.582451 | 2       | 0      | 0      | 0       | 0      | 0        |
|     |     | 186 | ACA | 0 | 1 | 1        | 2       | 0      | 0.5    | 0.5     | 0.6667 | 2.79999  |
|     |     | 187 | CCT | 0 | 0 | 1        | 2       | 0      | 0      | 0       | 0      | 0        |
|     |     | 188 | GAG | 1 | 0 | 0.541413 | 2.13321 | 1.847  | 0      | -1.847  | 1      | -10.3433 |
|     |     | 189 | TTT | 0 | 0 | 0.390699 | 2.6093  | 0      | 0      | 0       | 0      | 0        |
|     |     | 190 | CCT | 1 | 0 | 1        | 2       | 1      | 0      | -1      | 1      | -5.59999 |
|     |     | 191 | ATC | 0 | 0 | 0.861875 | 2.13813 | 0      | 0      | 0       | 0      | 0        |
|     |     | 192 | GAG | 0 | 0 | 0.542963 | 2.13166 | 0      | 0      | 0       | 0      | 0        |

|  |  |     |     |   |   |            |         |        |        |         |        |          |
|--|--|-----|-----|---|---|------------|---------|--------|--------|---------|--------|----------|
|  |  | 193 | TCC | 0 | 0 | 1          | 2       | 0      | 0      | 0       | 0      | 0        |
|  |  | 194 | CTC | 0 | 0 | 1          | 2       | 0      | 0      | 0       | 0      | 0        |
|  |  | 195 | ATG | 0 | 1 | 0.00856171 | 2.99144 | 0      | 0.3343 | 0.33429 | 0.9971 | 1.872    |
|  |  | 196 | TGT | 0 | 0 | 0.390699   | 2.22898 | 0      | 0      | 0       | 0      | 0        |
|  |  | 197 | CAT | 0 | 1 | 0.397183   | 2.60282 | 0      | 0.3842 | 0.3842  | 0.8676 | 2.15151  |
|  |  | 198 | GAG | 0 | 0 | 0.542963   | 2.13166 | 0      | 0      | 0       | 0      | 0        |
|  |  | 199 | ACC | 0 | 0 | 1          | 2       | 0      | 0      | 0       | 0      | 0        |
|  |  | 200 | ATT | 0 | 0 | 0.771022   | 2.22898 | 0      | 0      | 0       | 0      | 0        |
|  |  | 201 | GAA | 0 | 0 | 0.397158   | 2.27746 | 0      | 0      | 0       | 0      | 0        |
|  |  | 202 | AGC | 0 | 0 | 0.582451   | 2.41755 | 0      | 0      | 0       | 0      | 0        |
|  |  | 203 | TGG | 0 | 0 | 0          | 1.91407 | 0      | 0      | 0       | 0      | 0        |
|  |  | 204 | AAA | 0 | 0 | 0.397158   | 2.20753 | 0      | 0      | 0       | 0      | 0        |
|  |  | 205 | AAT | 0 | 1 | 0.407036   | 2.59296 | 0      | 0.3857 | 0.38566 | 0.8643 | 2.15969  |
|  |  | 206 | GAA | 0 | 2 | 0.396074   | 2.33315 | 0      | 0.8572 | 0.85721 | 0.7308 | 4.80036  |
|  |  | 207 | CAT | 0 | 0 | 0.390699   | 2.6093  | 0      | 0      | 0       | 0      | 0        |
|  |  | 208 | CTA | 2 | 0 | 1.44363    | 1.55637 | 1.3854 | 0      | -1.3854 | 1      | -7.75823 |
|  |  | 209 | TAC | 0 | 0 | 0.582451   | 2       | 0      | 0      | 0       | 0      | 0        |
|  |  | 210 | TCC | 0 | 0 | 1          | 2       | 0      | 0      | 0       | 0      | 0        |
|  |  | 211 | GTA | 0 | 0 | 1          | 2       | 0      | 0      | 0       | 0      | 0        |
|  |  | 212 | AGC | 0 | 0 | 0.582451   | 2.41755 | 0      | 0      | 0       | 0      | 0        |
|  |  | 213 | CTC | 0 | 0 | 1          | 2       | 0      | 0      | 0       | 0      | 0        |
|  |  | 214 | GAA | 0 | 0 | 0.397158   | 2.27746 | 0      | 0      | 0       | 0      | 0        |
|  |  | 215 | TCA | 0 | 0 | 1          | 1.58245 | 0      | 0      | 0       | 0      | 0        |
|  |  | 216 | TAC | 1 | 0 | 0.581773   | 2       | 1.7189 | 0      | -1.7189 | 1      | -9.62573 |
|  |  | 217 | ATC | 0 | 0 | 0.861875   | 2.13813 | 0      | 0      | 0       | 0      | 0        |

|     |  |     |     |   |   |          |         |        |        |         |        |          |
|-----|--|-----|-----|---|---|----------|---------|--------|--------|---------|--------|----------|
|     |  | 218 | CTT | 0 | 0 | 1        | 2       | 0      | 0      | 0       | 0      | 0        |
|     |  | 219 | TGT | 0 | 0 | 0.390699 | 2.22898 | 0      | 0      | 0       | 0      | 0        |
|     |  | 220 | ACT | 0 | 0 | 1        | 2       | 0      | 0      | 0       | 0      | 0        |
|     |  | 221 | TCC | 1 | 0 | 1        | 1.96596 | 1      | 0      | -1      | 1      | -5.59999 |
|     |  | 222 | ACT | 0 | 0 | 1        | 2       | 0      | 0      | 0       | 0      | 0        |
|     |  | 223 | CCT | 0 | 0 | 1        | 2       | 0      | 0      | 0       | 0      | 0        |
|     |  | 224 | GCG | 0 | 0 | 1        | 2       | 0      | 0      | 0       | 0      | 0        |
|     |  | 225 | GAT | 0 | 0 | 0.390699 | 2.6093  | 0      | 0      | 0       | 0      | 0        |
|     |  | 226 | AAG | 0 | 1 | 0.542963 | 2.06197 | 0      | 0.485  | 0.48497 | 0.7916 | 2.71584  |
|     |  | 227 | GCC | 0 | 0 | 1        | 2       | 0      | 0      | 0       | 0      | 0        |
|     |  | 228 | GTA | 1 | 0 | 1        | 2       | 1      | 0      | -1      | 1      | -5.59999 |
|     |  | 229 | ACT | 0 | 0 | 1        | 2       | 0      | 0      | 0       | 0      | 0        |
|     |  | 230 | GAT | 0 | 0 | 0.390699 | 2.6093  | 0      | 0      | 0       | 0      | 0        |
|     |  | 231 | TTA | 1 | 0 | 0.791475 | 1.60491 | 1.2635 | 0      | -1.2635 | 1      | -7.07538 |
|     |  | 232 | GAG | 0 | 1 | 0.542963 | 2.12984 | 0      | 0.4695 | 0.46952 | 0.7969 | 2.6293   |
|     |  | 233 | TGG | 0 | 0 | 0        | 1.91407 | 0      | 0      | 0       | 0      | 0        |
|     |  | 234 | ATG | 0 | 0 | 0        | 3       | 0      | 0      | 0       | 0      | 0        |
|     |  | 235 | GAC | 0 | 0 | 0.582451 | 2.41755 | 0      | 0      | 0       | 0      | 0        |
|     |  | 236 | GAT | 0 | 0 | 0.390699 | 2.6093  | 0      | 0      | 0       | 0      | 0        |
|     |  | 237 | TAT | 0 | 0 | 0.390699 | 2       | 0      | 0      | 0       | 0      | 0        |
|     |  | 238 | TCC | 0 | 0 | 1        | 2       | 0      | 0      | 0       | 0      | 0        |
|     |  | 239 | AGG | 0 | 0 | 0.750493 | 2.24951 | 0      | 0      | 0       | 0      | 0        |
| 240 |  | 240 | AGT | 0 | 0 | 0.390699 | 2.6093  | 0      | 0      | 0       | 0      | 0        |
|     |  | 241 | CAC | 0 | 0 | 0.582451 | 2.41755 | 0      | 0      | 0       | 0      | 0        |
|     |  | 242 | CGG | 0 | 0 | 1.27942  | 1.72058 | 0      | 0      | 0       | 0      | 0        |

|  |  |     |     |   |   |          |         |   |        |         |        |          |
|--|--|-----|-----|---|---|----------|---------|---|--------|---------|--------|----------|
|  |  | 243 | GAC | 0 | 1 | 0.580478 | 2.41606 | 0 | 0.4139 | 0.4139  | 0.8063 | 2.31782  |
|  |  | 244 | GGC | 0 | 0 | 1        | 2       | 0 | 0      | 0       | 0      | 0        |
|  |  | 245 | ATA | 0 | 0 | 0.602842 | 2.39716 | 0 | 0      | 0       | 0      | 0        |
|  |  | 246 | AGT | 0 | 0 | 0.390699 | 2.6093  | 0 | 0      | 0       | 0      | 0        |
|  |  | 247 | CCA | 1 | 0 | 1        | 2       | 1 | 0      | -1      | 1      | -5.59999 |
|  |  | 248 | TCT | 0 | 2 | 0.99351  | 2       | 0 | 1      | 1       | 0.4464 | 5.59999  |
|  |  | 249 | ACA | 0 | 0 | 1        | 2       | 0 | 0      | 0       | 0      | 0        |
|  |  | 250 | TCT | 0 | 0 | 1        | 2       | 0 | 0      | 0       | 0      | 0        |
|  |  | 251 | GCG | 0 | 0 | 1        | 2       | 0 | 0      | 0       | 0      | 0        |
|  |  | 252 | GTC | 0 | 0 | 1        | 2       | 0 | 0      | 0       | 0      | 0        |
|  |  | 253 | CGA | 0 | 0 | 1.27942  | 1.13813 | 0 | 0      | 0       | 0      | 0        |
|  |  | 254 | CAA | 0 | 0 | 0.397158 | 2.02039 | 0 | 0      | 0       | 0      | 0        |
|  |  | 255 | GAA | 0 | 0 | 0.397158 | 2.27746 | 0 | 0      | 0       | 0      | 0        |
|  |  | 256 | CAG | 0 | 0 | 0.542963 | 1.87459 | 0 | 0      | 0       | 0      | 0        |
|  |  | 257 | GAA | 0 | 0 | 0.397158 | 2.27746 | 0 | 0      | 0       | 0      | 0        |
|  |  | 258 | AGA | 0 | 1 | 0.595773 | 2.00891 | 0 | 0.4978 | 0.49778 | 0.7713 | 2.78757  |
|  |  | 259 | CTT | 0 | 0 | 1        | 2       | 0 | 0      | 0       | 0      | 0        |
|  |  | 260 | CCT | 0 | 0 | 1        | 2       | 0 | 0      | 0       | 0      | 0        |
|  |  | 261 | GGG | 0 | 0 | 1        | 2       | 0 | 0      | 0       | 0      | 0        |
|  |  | 262 | CAA | 0 | 0 | 0.397158 | 2.02039 | 0 | 0      | 0       | 0      | 0        |
|  |  | 263 | GAT | 0 | 0 | 0.390699 | 2.6093  | 0 | 0      | 0       | 0      | 0        |
|  |  | 264 | CTC | 0 | 0 | 1        | 2       | 0 | 0      | 0       | 0      | 0        |





**Supplementary Table S 6. The primers used in this study**

| <b>Primer name</b> | <b>Primer sequence ( 5'→3')</b> |
|--------------------|---------------------------------|
| 40F                | TGAGTGC GCGGAGGCTTTTGG          |
| 806R               | TCTGGCATTGCCTGTTTCGG            |
| 735F               | TCCGTT CATCGGTCCAGTCCG          |
| 1886R              | ACTCCGTAAGCCTCGAATCC            |
| 1828F              | TTGCGCTTGATCCGCAGGAG            |
| 118R               | AAGCTAAGGCATGGCACACATTTC        |
